# Supplementary material for: Synthesis of 1-methyleneindenes via palladium-catalyzed tandem reactions
Source: Royal Society of Chemistry journal article supplement (doi:10.1039/b909178e), 2009-01-01

# Synthesis of 1-methyleneindenes via palladium-catalyzed tandem reactions

Shengqing Ye,<sup>a</sup> Ke Gao,<sup>a</sup> Haibo Zhou,<sup>a</sup> Xiaodi Yang,<sup>c</sup> and Jie Wu<sup>\*,a,b</sup>

<sup>a</sup> Department of Chemistry, Fudan University, 220 Handan Road, Shanghai 200433, China <sup>b</sup> State Key Laboratory of Organometallic Chemistry, Shanghai Institute of Organic Chemistry, Chinese Academy of Sciences, 354 Fenglin Road, Shanghai 200032, China <sup>c</sup> Laboratory of Advanced Materials, Fudan University, 220 Handan Road, Shanghai 200433, China.

jie\_wu@fudan.edu.cn

## Supporting Information

1. General experimental methods (S2)
2. Condition screening, general experimental procedure and characterization data. (S2-S12).
3. <sup>1</sup>H and <sup>13</sup>C spectra of compound **2-4** (S13-S48).
4. The crystal structure and other crystallographic data of compound **4a** (S49-S51).

## General experimental methods:

All reactions were performed in reaction tubes under nitrogen atmosphere. Flash column chromatography was performed using silica gel (60-Å pore size, 32–63 µm, standard grade). Analytical thin-layer chromatography was performed using glass plates pre-coated with 0.25 mm 230–400 mesh silica gel impregnated with a fluorescent indicator (254 nm). Thin layer chromatography plates were visualized by exposure to ultraviolet light. Organic solutions were concentrated on rotary evaporators at ~20 Torr (house vacuum) at 25–35°C. Commercial reagents and solvents were used as received. Nuclear magnetic resonance (NMR) spectra are recorded in parts per million from internal tetramethylsilane on the δ scale.

**Table 1.** Initial Studies for Pd-Catalyzed Reaction of (*E*)-Ethyl 3-(2-(2-phenylethynyl)phenyl)acrylate **1a**

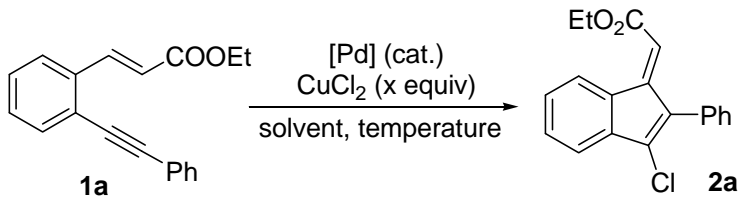

| entry | [Pd]                         | CuCl <sub>2</sub><br>(equiv) | Solvent / T<br>(°C) | time (h) | yield<br>(%) <sup>a</sup> |
|-------|------------------------------|------------------------------|---------------------|----------|---------------------------|
| 1     | PdCl <sub>2</sub> (10 mol %) | 2.0                          | DMAc / 120          | 6        | 40                        |
| 2     | PdCl <sub>2</sub> (10 mol %) | 2.0                          | DMAc / 80           | 6        | 41                        |
| 3     | PdCl <sub>2</sub> (10 mol %) | 2.0                          | DMAc / 50           | 72       | 40                        |
| 4     | PdCl <sub>2</sub> (10 mol %) | 2.0                          | DMAc / rt           | 72       | trace                     |
| 5     | PdCl <sub>2</sub> (10 mol %) | 2.0                          | toluene / 80        | 12       | trace                     |
| 6     | PdCl <sub>2</sub> (10 mol %) | 2.0                          | dioxane / 80        | 12       | 8                         |
| 7     | PdCl <sub>2</sub> (10 mol %) | 2.0                          | MeCN / 80           | 12       | 11                        |
| 8     | PdCl <sub>2</sub> (10 mol %) | 2.0                          | DCE / 80            | 12       | 25                        |
| 9     | PdCl <sub>2</sub> (10 mol %) | 2.0                          | THF / 80            | 12       | trace                     |
| 10    | PdCl <sub>2</sub> (10 mol %) | 2.0                          | DMF / 80            | 12       | 39                        |

|    |                                                              |     |           |    |    |
|----|--------------------------------------------------------------|-----|-----------|----|----|
| 11 | PdCl <sub>2</sub> (10 mol %)                                 | 2.0 | DME / 80  | 12 | 20 |
| 12 | PdCl <sub>2</sub> (10 mol %)                                 | 2.0 | NMP / 80  | 6  | 36 |
| 13 | PdCl <sub>2</sub> (10 mol %)                                 | 2.0 | DMSO / 80 | 12 | NR |
| 14 | PdCl <sub>2</sub> (10 mol %)                                 | 4.0 | DMAc / 80 | 3  | 57 |
| 15 | PdCl <sub>2</sub> (10 mol %)                                 | 6.0 | DMAc / 80 | 7  | 54 |
| 16 | -                                                            | 4.0 | DMAc / 80 | 24 | NR |
| 17 | PdCl <sub>2</sub> (5 mol %)                                  | 4.0 | DMAc / 80 | 5  | 58 |
| 18 | PdCl <sub>2</sub> (PPh <sub>3</sub> ) <sub>2</sub> (5 mol %) | 4.0 | DMAc / 80 | 24 | 53 |
| 19 | Pd(OAc) <sub>2</sub> (5 mol %)                               | 4.0 | DMAc / 80 | 3  | 66 |
| 20 | Pd(TFA) <sub>2</sub> (5 mol %)                               | 4.0 | DMAc / 80 | 3  | 57 |
| 21 | PdCl <sub>2</sub> (dppf) (5 mol %)                           | 4.0 | DMAc / 80 | 12 | 33 |
| 22 | Pd(OAc) <sub>2</sub> (2 mol %)                               | 4.0 | DMAc / 80 | 12 | 55 |

<sup>a</sup>Isolated yield based on (*E*)-ethyl 3-(2-alkynylphenyl)acrylate **1a**

**General procedure for Pd-catalyzed reaction of 2-alkenylphenylacetylene **1** in the presence of CuCl<sub>2</sub>.**

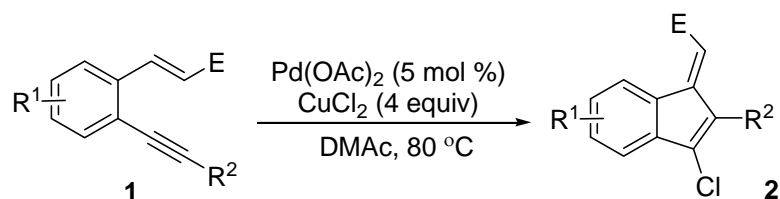

2-Alkenylphenylacetylene **1** (0.25 mmol) was added to a solution of Pd(OAc)<sub>2</sub> (0.0125 mmol, 5 mol %) and CuCl<sub>2</sub> (1 mmol, 4 equiv) in DMAc (1.0 mL). The solution was then stirred at 80 °C. After completion of reaction as indicated by TLC, the reaction was quenched with aqueous HCl (1.0 M), extracted with EtOAc (2x10 mL), dried by anhydrous Na<sub>2</sub>SO<sub>4</sub>. Evaporation of the solvent followed by purification on silica gel provided the product **2**.

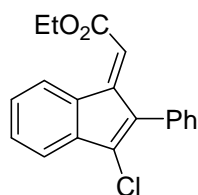

**(E)-Ethyl 2-(3-chloro-2-phenyl-1H-inden-1-ylidene)acetate (**2a**)**

Yield: 66% (51 mg), yellow oil.  $^1\text{H}$  NMR (400 MHz,  $\text{CDCl}_3$ )  $\delta$  1.31 (t,  $J = 7.1$  Hz, 3H ), 4.27 (q,  $J = 7.1$  Hz, 2H), 6.18 (s, 1H ), 7.31-7.49 (m, 8H ), 8.64 (d,  $J = 7.8$  Hz, 1H );  $^{13}\text{C}$  NMR (100 MHz,  $\text{CDCl}_3$ )  $\delta$  14.2, 60.9, 119.0, 120.5, 127.0, 128.1, 128.2, 128.4, 130.3, 130.5, 131.5, 131.7, 136.2, 137.6, 140.8, 149.4, 165.9; IR (KBr):  $\nu_{\text{max}}/\text{cm}^{-1}$  3060, 2979, 1713, 1619, 1449; MS (ESI):  $m/z$  311 ( $\text{M}^+ + 1$ ), 333 ( $\text{M}^+ + \text{Na}$ ); HRMS (ESI) calcd for  $\text{C}_{19}\text{H}_{15}\text{ClNaO}_2$  ( $\text{M} + \text{Na}^+$ ) 333.0658, found 333.0668.

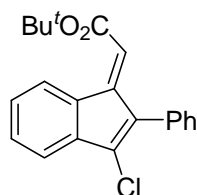

**(E)-tert-Butyl 2-(3-chloro-2-phenyl-1H-inden-1-ylidene)acetate (2b)**

Yield: 60% (51 mg), yellow oil.  $^1\text{H}$  NMR (400 MHz,  $\text{CDCl}_3$ )  $\delta$  1.53 (s, 9H ), 6.13 (s, 1H ), 7.30 - 7.50 (m, 8H ), 8.56 (d,  $J = 7.8$  Hz, 1H );  $^{13}\text{C}$  NMR (100 MHz,  $\text{CDCl}_3$ )  $\delta$  28.1, 81.6, 118.9, 122.7, 126.7, 127.9, 128.2, 128.3, 130.0, 130.5, 131.6, 131.9, 135.5, 137.6, 140.7, 147.7, 165.5; IR (KBr):  $\nu_{\text{max}}/\text{cm}^{-1}$  3060, 2974, 1713, 1445, 1367; MS (ESI):  $m/z$  339 ( $\text{M}^+ + 1$ ), 361 ( $\text{M}^+ + \text{Na}$ ); HRMS (ESI) calcd for  $\text{C}_{21}\text{H}_{19}\text{ClNaO}_2$  ( $\text{M} + \text{Na}^+$ ) 361.0971, found 361.1007.

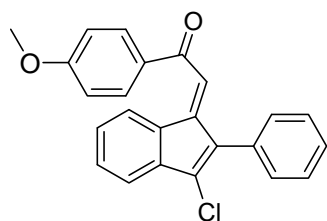

**(E)-2-(3-Chloro-2-phenyl-1H-inden-1-ylidene)-1-(4-methoxyphenyl)ethanone (2c)**

Yield: 90% (84 mg), red oil.  $^1\text{H}$  NMR (500 MHz,  $\text{CDCl}_3$ )  $\delta$  3.84 (s, 3H ), 6.91 (d,  $J = 8.9$  Hz, 2H ), 6.98 (s, 1H ), 7.19 (t,  $J = 7.3$  Hz, 1H ), 7.34 - 7.45 (m, 3H ), 7.48 - 7.52 (m, 4H ), 7.87 (d,  $J = 7.6$  Hz, 1H ), 7.94 (d,  $J = 8.9$  Hz, 2H );  $^{13}\text{C}$  NMR (125 MHz,  $\text{CDCl}_3$ )  $\delta$  55.5, 114.0, 119.0, 125.1, 127.3, 127.6, 128.2, 128.4, 129.7, 130.3, 130.4, 131.3, 131.8, 131.9, 135.0, 137.0, 140.6, 145.5, 164.1, 191.8; IR (KBr):  $\nu_{\text{max}}/\text{cm}^{-1}$  3056, 2924, 1658, 1596, 1444; MS (ESI):  $m/z$  373 ( $\text{M}^+ + 1$ ); HRMS (ESI) calcd for  $\text{C}_{24}\text{H}_{18}\text{ClO}_2$  ( $\text{M} + \text{H}^+$ ) 373.0995, found 373.1025.

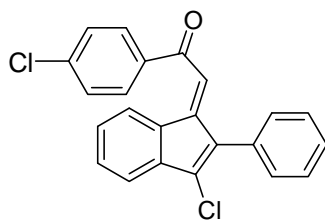

**(E)-2-(3-Chloro-2-phenyl-1H-inden-1-ylidene)-1-(4-chlorophenyl)ethanone (2d)**

Yield: 71% (67 mg), red oil.  $^1\text{H}$  NMR (500 MHz,  $\text{CDCl}_3$ )  $\delta$  6.96 (s, 1H ), 7.21 (t,  $J$  = 7.3 Hz, 1H ), 7.35 – 7.52 (m, 9H ), 7.86 (d,  $J$  = 8.6 Hz, 2H ), 7.96 (d,  $J$  = 7.6 Hz, 1H );  $^{13}\text{C}$  NMR (125 MHz,  $\text{CDCl}_3$ )  $\delta$  119.2, 125.3, 125.7, 127.9, 128.3, 128.5, 129.1, 130.1, 130.2, 130.4, 131.6, 131.7, 135.8, 136.1, 137.1, 140.1, 140.7, 147.3, 191.5; IR (KBr):  $\nu_{\text{max}}/\text{cm}^{-1}$  3056, 2928, 1666, 1593, 1445; MS (ESI):  $m/z$  377 ( $\text{M}^+ + 1$ ); HRMS (ESI) calcd for  $\text{C}_{23}\text{H}_{15}\text{ClO}_2$  ( $\text{M} + \text{H}^+$ ) 377.0500, found 377.0524.

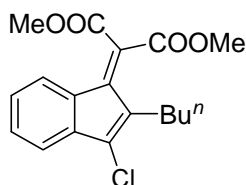

**Dimethyl 2-(2-butyl-3-chloro-1H-inden-1-ylidene)malonate (2e)**

Yield: 95% (79 mg), yellow oil.  $^1\text{H}$  NMR (500 MHz,  $\text{CDCl}_3$ )  $\delta$  0.93 (t,  $J$  = 7.6 Hz, 3H ), 1.33 – 1.38 (m, 2H ), 1.41 – 1.47 (m, 2H ), 2.49 (t,  $J$  = 7.6 Hz, 2H ), 3.88 (s, 3H ), 3.94 (s, 3H ), 7.14 (t,  $J$  = 7.6 Hz, 1H ), 7.22 (d,  $J$  = 7.6 Hz, 1H ), 7.29 (t,  $J$  = 7.6 Hz, 1H ), 7.43 (d,  $J$  = 7.6 Hz, 1H );  $^{13}\text{C}$  NMR (125 MHz,  $\text{CDCl}_3$ )  $\delta$  13.8, 22.8, 165.3, 25.7, 31.3, 52.9, 53.2, 118.7, 123.5, 127.2, 130.1, 132.7, 135.6, 139.9, 140.0, 143.2, 165.0; IR (KBr):  $\nu_{\text{max}}/\text{cm}^{-1}$  2951, 2874, 1724, 1600, 1460; MS (ESI):  $m/z$  335 ( $\text{M}^+ + 1$ ); HRMS (ESI) calcd for  $\text{C}_{18}\text{H}_{20}\text{ClO}_4$  ( $\text{M} + \text{H}^+$ ) 335.1050, found 335.1075.

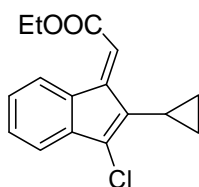

**(E)-Ethyl 2-(3-chloro-2-cyclopropyl-1H-inden-1-ylidene)acetate (2f)**

Yield: 54% (37 mg), yellow oil.  $^1\text{H}$  NMR (500 MHz,  $\text{CDCl}_3$ )  $\delta$  0.78 – 0.81 (m, 2H ), 0.96 – 1.00 (m, 2H ), 1.38 (t,  $J$  = 7.6 Hz, 3H ), 1.50 – 1.56 (m, 1H ), 4.32 (q,  $J$  = 7.6 Hz, 2H ), 6.70 (s, 1H ), 7.22 – 7.25 (m, 2H ), 7.31 (t,  $J$  = 7.3 Hz, 1H ), 8.52 (d,  $J$  = 7.3

Hz, 1H );  $^{13}\text{C}$  NMR (125 MHz,  $\text{CDCl}_3$ )  $\delta$  5.8, 6.2, 14.3, 60.8, 117.9, 118.4, 126.8, 127.7, 130.0, 131.5, 136.4, 137.0, 141.2, 150.1, 166.1; IR (KBr):  $\nu_{\text{max}}/\text{cm}^{-1}$  3072, 2975, 2940, 1717, 1631, 1449; MS (ESI):  $m/z$  275 ( $\text{M}^+ + 1$ ); HRMS (ESI) calcd for  $\text{C}_{16}\text{H}_{16}\text{ClO}_2$  ( $\text{M} + \text{H}^+$ ) 275.0839, found 275.0839.

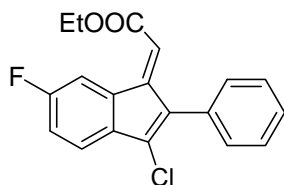

**(E)-Ethyl 2-(3-chloro-6-fluoro-2-phenyl-1H-inden-1-ylidene)acetate (2g)**

Yield: 55% (45 mg), red solid, melting point: 58.5-59.1 °C.  $^1\text{H}$  NMR (500 MHz,  $\text{CDCl}_3$ )  $\delta$  1.32 (t,  $J = 7.1$  Hz, 3H ), 4.28 (q,  $J = 7.1$  Hz, 2H ), 6.21 (s, 1H ), 7.09 (dt,  $J = 2.0, 8.3$  Hz, 1H ), 7.30 (dd,  $J = 5.0, 8.3$  Hz, 1H ), 7.35 – 7.36 (m, 2H ), 7.42 (t,  $J = 7.5$ , 1H ), 7.47 – 7.49 (m, 2H ), 8.49 (dd,  $J = 2.0, 7.8$  Hz, 1H );  $^{13}\text{C}$  NMR (125 MHz,  $\text{CDCl}_3$ )  $\delta$  14.1, 61.1, 115.7 (d,  $^2J_{\text{CF}} = 28.1$  Hz ), 116.3 (d,  $^2J_{\text{CF}} = 24.0$  Hz ), 119.7 (d,  $^3J_{\text{CF}} = 7.8$  Hz ), 121.4, 128.3, 128.4, 130.4, 131.5, 133.3 (d,  $^3J_{\text{CF}} = 9.9$  Hz ), 135.6, 136.8, 137.5, 148.7, 163.3 (d,  $^1J_{\text{CF}} = 243.7$  Hz ), 165.7; IR (KBr):  $\nu_{\text{max}}/\text{cm}^{-1}$  3107, 2975, 1717, 1584, 1460; MS (ESI):  $m/z$  329 ( $\text{M}^+ + 1$ ); HRMS (ESI) calcd for  $\text{C}_{19}\text{H}_{15}\text{ClFO}_2$  ( $\text{M} + \text{H}^+$ ) 329.0745, found 329.0742. Elem. Anal. Calcd for  $\text{C}_{19}\text{H}_{14}\text{ClFO}_2$ : C, 69.41; H, 4.29; Found: C, 69.46; H, 4.14.

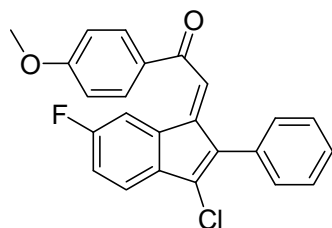

**(E)-2-(3-Chloro-6-fluoro-2-phenyl-1H-inden-1-ylidene)-1-(4-methoxyphenyl)ethanone (2h)**

Yield: 64% (63 mg), red solid, melting point: 124.1-124.5 °C.  $^1\text{H}$  NMR (400 MHz,  $\text{CDCl}_3$ )  $\delta$  3.84 (s, 3H ), 6.92 (d,  $J = 8.7$  Hz, 2H ), 7.04 (dt,  $J = 2.3, 8.7$  Hz, 1H ), 7.06 (s, 1H ), 7.30 (dd,  $J = 5.0, 8.3$  Hz, 1H ), 7.43 – 7.53 (m, 5H ), 7.76 (dd,  $J = 2.3, 9.6$  Hz, 1H ), 7.92 (d,  $J = 8.7$  Hz, 2H );  $^{13}\text{C}$  NMR (100 MHz,  $\text{CDCl}_3$ )  $\delta$  55.5, 113.6 (d,  $^2J_{\text{CF}} = 26.7$  Hz ), 114.0, 116.0 (d,  $^2J_{\text{CF}} = 22.9$  Hz ), 119.7 (d,  $^3J_{\text{CF}} = 8.6$  Hz ), 127.9, 128.3,

128.5, 130.3, 130.4, 131.3, 131.7, 133.6 (d,  $^3J_{CF} = 9.5$  Hz), 134.6, 136.5, 136.9, 145.1, 162.9 (d,  $^1J_{CF} = 245.0$  Hz), 164.1, 191.0; IR (KBr):  $\nu_{\max}/\text{cm}^{-1}$  3106, 2932, 2835, 1650, 1592, 1456; MS (ESI):  $m/z$  391 ( $M^+ + 1$ ); HRMS (ESI) calcd for  $\text{C}_{24}\text{H}_{17}\text{ClFO}_2$  ( $M + \text{H}^+$ ) 391.0901, found 391.0930. Elem. Anal. Calcd for  $\text{C}_{24}\text{H}_{16}\text{ClFO}_2$ : C, 73.75; H, 4.13; Found: C, 73.55; H, 3.97.

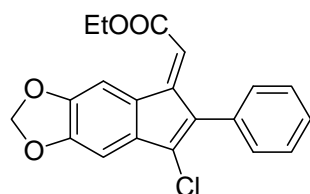

**(E)-Ethyl 2-(7-chloro-6-phenyl-5H-indeno[5,6-d][1,3]dioxol-5-ylidene)acetate (2i)**

Yield: 72% (64 mg), red oil.  $^1\text{H}$  NMR (500 MHz,  $\text{CDCl}_3$ )  $\delta$  1.30 (t,  $J = 7.1$  Hz, 3H), 4.25 (q,  $J = 7.1$  Hz, 2H), 6.01 (s, 2H), 6.09 (s, 1H), 6.86 (s, 1H), 7.33 – 7.34 (m, 2H), 7.39 (t,  $J = 7.3$  Hz, 1H), 7.44 – 7.47 (m, 2H), 8.30 (s, 1H);  $^{13}\text{C}$  NMR (125 MHz,  $\text{CDCl}_3$ )  $\delta$  14.1, 60.8, 100.8, 101.7, 109.2, 119.8, 125.4, 128.0, 128.3, 130.5, 131.7, 135.0, 136.5, 136.6, 147.6, 149.1, 165.9; IR (KBr):  $\nu_{\max}/\text{cm}^{-1}$  3115, 2986, 2924, 1716, 1588, 1460; MS (ESI):  $m/z$  355 ( $M^+ + 1$ ); HRMS (ESI) calcd for  $\text{C}_{20}\text{H}_{16}\text{ClO}_4$  ( $M + \text{H}^+$ ) 355.0737, found 355.0767.

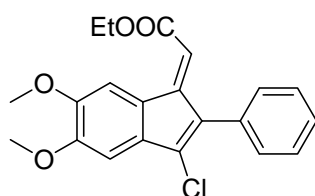

**(E)-Ethyl 2-(3-chloro-5,6-dimethoxy-2-phenyl-1H-inden-1-ylidene)acetate (2j)**

Yield: 78% (72 mg), red solid, melting point: 113.3-113.6 °C.  $^1\text{H}$  NMR (400 MHz,  $\text{CDCl}_3$ )  $\delta$  1.30 (t,  $J = 7.3$  Hz, 3H), 3.98 (s, 3H), 3.99 (s, 3H), 4.25 (q,  $J = 7.3$  Hz, 2H), 6.11 (s, 1H), 6.92 (s, 1H), 7.34 – 7.48 (m, 5H), 8.55 (s, 1H);  $^{13}\text{C}$  NMR (100 MHz,  $\text{CDCl}_3$ )  $\delta$  14.2, 56.1, 56.3, 60.7, 102.7, 112.1, 119.3, 123.9, 128.0, 128.2, 130.5, 131.8, 134.8, 135.5, 136.3, 148.5, 150.1, 150.7, 166.1; IR (KBr):  $\nu_{\max}/\text{cm}^{-1}$  3122, 3048, 2932, 2831, 1713, 1600, 1483; MS (ESI):  $m/z$  371 ( $M^+ + 1$ ); HRMS (ESI) calcd for  $\text{C}_{21}\text{H}_{20}\text{ClO}_4$  ( $M + \text{H}^+$ ) 371.1050, found 371.1076. Elem. Anal. Calcd for  $\text{C}_{21}\text{H}_{19}\text{ClO}_4$ : C, 68.02; H, 5.16; Found: C, 68.02; H, 4.96.

**General procedure for Pd-catalyzed reaction of 2-alkenylphenylacetylene **1** in the presence of CuBr<sub>2</sub>.**

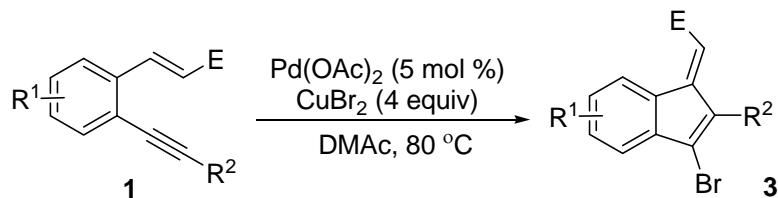

2-Alkenylphenylacetylene **1** (0.25 mmol) was added to a solution of Pd(OAc)<sub>2</sub> (0.0125 mmol, 5 mol %), and CuBr<sub>2</sub> (1 mmol, 4.0 equiv) in DMAc (1.0 mL). The solution was then stirred at 80 °C. After completion of reaction as indicated by TLC, the reaction was quenched with aqueous HCl (1.0 M), extracted with EtOAc (2 x 10 mL), dried by anhydrate Na<sub>2</sub>SO<sub>4</sub>. Evaporation of the solvent followed by purification on silica gel provided the product **3**.

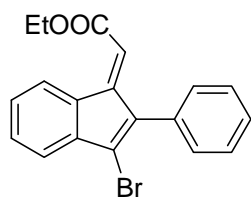

**(E)-Ethyl 2-(3-bromo-2-phenyl-1H-inden-1-ylidene)acetate (**3a**)**

Yield: 72% (64 mg), yellow oil. <sup>1</sup>H NMR (500 MHz, CDCl<sub>3</sub>) δ 1.31 (t, *J* = 7.1 Hz, 3H), 4.27 (q, *J* = 7.1 Hz, 2H), 6.17 (s, 1H), 7.30 – 7.48 (m, 8H), 8.61 (d, *J* = 7.6 Hz, 1H); <sup>13</sup>C NMR (125 MHz, CDCl<sub>3</sub>) δ 14.1, 60.9, 120.3, 120.5, 126.9, 127.4, 128.0, 128.2, 128.3, 130.3, 130.4, 131.7, 132.8, 141.2, 142.0, 149.9, 166.0; IR (KBr):  $\nu_{\max}/\text{cm}^{-1}$  3060, 2983, 1717, 1623, 1445; MS (ESI): *m/z* 355 (M<sup>+</sup>+1); HRMS (ESI) calcd for C<sub>19</sub>H<sub>16</sub>BrO<sub>2</sub> (M + H<sup>+</sup>) 355.0334, found 355.0344.

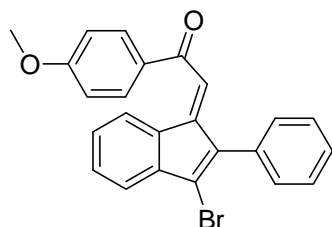

**(E)-2-(3-Bromo-2-phenyl-1H-inden-1-ylidene)-1-(4-methoxyphenyl)ethanone**

**(3b)**

Yield: 60% (63 mg), yellow oil. <sup>1</sup>H NMR (500 MHz, CDCl<sub>3</sub>) δ 3.84 (s, 3H), 6.92 (d,



$J = 8.9$  Hz, 2H ), 6.96 (s, 1H ), 7.16 – 7.19 (m, 1H ), 7.35 – 7.37 (m, 2H ), 7.43 – 7.52 (m, 5H ), 7.83 (d,  $J = 7.6$  Hz, 1H ), 7.93 (d,  $J = 7.3$  Hz, 2H );  $^{13}\text{C}$  NMR (125 MHz,  $\text{CDCl}_3$ )  $\delta$  55.5, 114.0, 120.3, 124.9, 126.1, 127.4, 127.6, 128.3, 128.4, 129.8, 130.4, 131.3, 132.1, 132.9, 140.6, 141.8, 146.0, 164.1, 191.8; IR (KBr):  $\nu_{\text{max}}/\text{cm}^{-1}$  3060, 2932, 2835, 1654, 1592, 1507; MS (ESI):  $m/z$  417 ( $\text{M}^+ + 1$ ); HRMS (ESI) calcd for  $\text{C}_{24}\text{H}_{18}\text{BrO}_2$  ( $\text{M} + \text{H}^+$ ) 417.0490, found 417.0515.

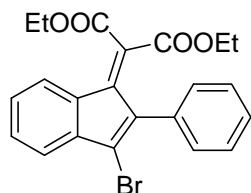

### Diethyl 2-(3-bromo-2-phenyl-1H-inden-1-ylidene)malonate (**3c**)

Yield: 84% (90 mg), yellow oil.  $^1\text{H}$  NMR (500 MHz,  $\text{CDCl}_3$ )  $\delta$  1.02 (t,  $J = 7.1$  Hz, 3H ), 1.34 (t,  $J = 7.1$  Hz, 3H ), 3.39 (q,  $J = 7.1$  Hz, 2H ), 4.41 (q,  $J = 7.1$  Hz, 2H ), 7.24 (t,  $J = 7.3$  Hz, 1H ), 7.33 – 7.41 (m, 7H ), 7.64 (d,  $J = 7.8$  Hz, 1H );  $^{13}\text{C}$  NMR (125 MHz,  $\text{CDCl}_3$ )  $\delta$  13.5, 13.8, 61.6, 62.3, 120.9, 123.7, 126.3, 127.7, 127.8, 127.9, 129.0, 130.3, 131.5, 132.9, 133.9, 138.7, 141.0, 143.9, 163.8, 164.7; IR (KBr):  $\nu_{\text{max}}/\text{cm}^{-1}$  3064, 2979, 1724, 1600, 1445; MS (ESI):  $m/z$  427 ( $\text{M}^+ + 1$ ); HRMS (ESI) calcd for  $\text{C}_{22}\text{H}_{20}\text{BrO}_4$  ( $\text{M} + \text{H}^+$ ) 427.0545, found 427.0562.

### General procedure for Pd-catalyzed cross couplings of 3-chloro-1-methyleneindene **2a** with arylboronic acids.

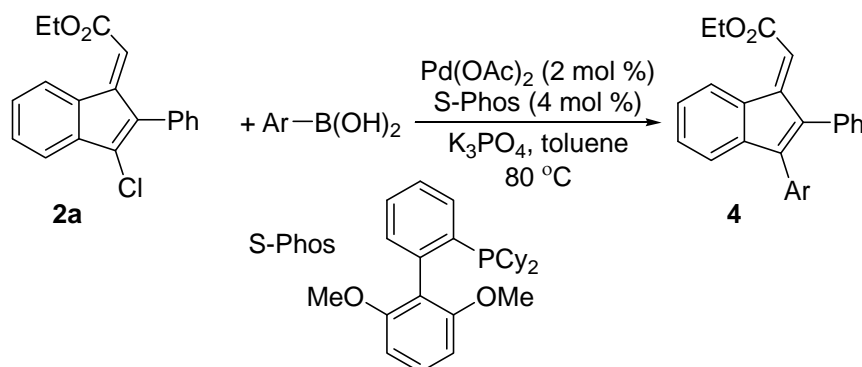

3-Chloro-1-methyleneindene **2a** (0.2 mmol) was added to a solution of arylboronic acids (0.3 mmol, 1.5 equiv),  $\text{Pd}(\text{OAc})_2$  (2 mol %), S-Phos (4 mol %), and  $\text{K}_3\text{PO}_4$  (0.4 mmol, 2equiv) in toluene (1 mL). The solution was then stirred at 80 °C. After

completion of reaction as indicated by TLC, the solvent was evaporated and the residue was purified on silica gel provided the desired product **4**.

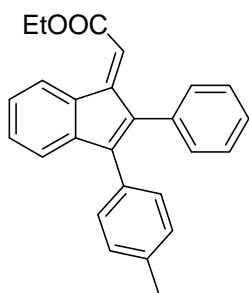

**(E)-Ethyl 2-(2-phenyl-3-p-tolyl-1H-inden-1-ylidene)acetate (4a)**

Yield: 92% (67 mg), yellow solid, melting point: 147.7-147.9 °C. <sup>1</sup>H NMR (500 MHz, CDCl<sub>3</sub>) δ 1.31 (t, *J* = 7.1 Hz, 3H ), 2.31 (s, 3H ), 4.27 (q, *J* = 7.1 Hz, 2H ), 6.16 (s, 1H ), 7.07 (d, *J* = 7.9 Hz, 2H ), 7.13 – 7.16 (m, 4H ), 7.25 – 7.31 (m, 6H ), 8.70 (d, *J* = 6.5 Hz, 1H ); <sup>13</sup>C NMR (125 MHz, CDCl<sub>3</sub>) δ 14.2, 21.3, 60.6, 119.8, 120.4, 126.9, 127.2, 127.3, 128.1, 128.9, 129.1, 129.7, 130.8, 130.9, 133.3, 134.2, 137.6, 139.0, 144.4, 144.9, 152.2, 166.4; IR (KBr):  $\nu_{\max}/\text{cm}^{-1}$  3052, 2917, 2854, 1716, 1611, 1452; MS (ESI): *m/z* 367 (M<sup>+</sup>+1); HRMS (ESI) calcd for C<sub>26</sub>H<sub>23</sub>O<sub>2</sub> (M + H<sup>+</sup>) 367.1698, found 367.1727. Elem. Anal. Calcd for C<sub>26</sub>H<sub>22</sub>O<sub>2</sub>: C, 85.22; H, 6.05; Found: C, 84.99; H, 5.99.

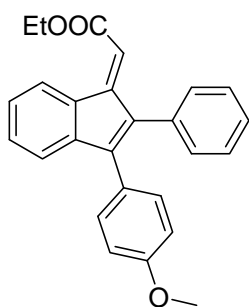

**(E)-Ethyl 2-(3-(4-methoxyphenyl)-2-phenyl-1H-inden-1-ylidene)acetate (4b)**

Yield: 70% (54 mg), yellow solid, melting point: 133.7-134.4 °C. <sup>1</sup>H NMR (500 MHz, CDCl<sub>3</sub>) δ 1.31 (t, *J* = 7.1 Hz, 3H ), 3.77 (s, 3H ), 4.27 (q, *J* = 7.1 Hz, 2H ), 6.16 (s, 1H ), 6.80 (d, *J* = 8.8 Hz, 2H ), 7.15 – 7.19 (m, 4H ), 7.26 – 7.32 (m, 6H ), 8.71 (d, *J* = 7.1 Hz, 1H ); <sup>13</sup>C NMR (125 MHz, CDCl<sub>3</sub>) δ 14.2, 55.1, 60.6, 113.7, 119.5, 120.4, 126.0, 126.9, 127.2, 127.3, 128.1, 129.7, 130.6, 131.0, 133.3, 134.2, 138.7, 144.4, 144.5, 152.2, 159.2, 166.5; IR (KBr):  $\nu_{\max}/\text{cm}^{-1}$  3056, 2959, 2835, 1709, 1608, 1507,

1449; MS (ESI):  $m/z$  383 ( $M^+ + 1$ ); HRMS (ESI) calcd for  $C_{26}H_{23}O_3$  ( $M + H^+$ ) 383.1647, found 383.1679. Elem. Anal. Calcd for  $C_{26}H_{22}O_3$ : C, 81.65; H, 5.80; Found: C, 81.48; H, 5.50.

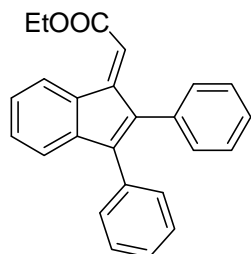

**(E)-Ethyl 2-(2,3-diphenyl-1H-inden-1-ylidene)acetate (4c)**

Yield: 99% (69.7 mg), yellow solid, melting point: 123.1-123.4 °C.  $^1H$  NMR (500 MHz,  $CDCl_3$ )  $\delta$  1.31 (t,  $J = 7.1$  Hz, 3H), 4.28 (q,  $J = 7.1$  Hz, 2H), 6.19 (s, 1H), 7.14 – 7.16 (m, 2H), 7.21 – 7.30 (m, 11H), 8.71 (d,  $J = 7.5$  Hz, 1H);  $^{13}C$  NMR (125 MHz,  $CDCl_3$ )  $\delta$  14.2, 60.7, 120.2, 120.4, 127.0, 127.3, 127.8, 128.1, 128.2, 129.2, 129.8, 130.9, 133.2, 133.8, 133.9, 139.4, 144.3, 144.9, 152.0, 166.4; IR (KBr):  $\nu_{max}/cm^{-1}$  3052, 2978, 1717, 1623, 1456; MS (ESI):  $m/z$  353 ( $M^+ + 1$ ); HRMS (ESI) calcd for  $C_{25}H_{21}O_2$  ( $M + H^+$ ) 353.1542, found 353.1563. Elem. Anal. Calcd for  $C_{25}H_{20}O_2$ : C, 85.20; H, 5.72; Found: C, 85.40; H, 5.51.

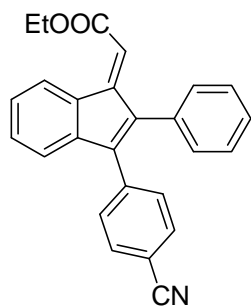

**(E)-Ethyl 2-(3-(4-cyanophenyl)-2-phenyl-1H-inden-1-ylidene)acetate (4d)**

Yield: 74% (56mg), yellow solid, melting point: 158.3-159.2 °C.  $^1H$  NMR (500 MHz,  $CDCl_3$ )  $\delta$  1.33 (t,  $J = 7.1$  Hz, 3H), 4.30 (q,  $J = 7.1$  Hz, 2H), 6.22 (s, 1H), 7.10 – 7.12 (m, 2H), 7.19 – 7.20 (m, 1H), 7.30 – 7.35 (m, 7H), 7.57 (d,  $J = 8.3$  Hz, 2H), 8.71 (d,  $J = 8.3$  Hz, 1H);  $^{13}C$  NMR (125 MHz,  $CDCl_3$ )  $\delta$  14.2, 60.9, 111.4, 118.6, 119.9, 121.6, 127.4, 127.6, 127.9, 128.4, 129.9, 130.0, 130.7, 132.0, 132.9, 133.0, 138.8, 141.1, 142.7, 143.2, 151.3, 166.1; IR (KBr):  $\nu_{max}/cm^{-1}$  3056, 2928, 2225, 1717, 1623, 1449; MS (ESI):  $m/z$  378 ( $M^+ + 1$ ), 400 ( $M^+ + Na$ ); HRMS (ESI) calcd for

$C_{26}H_{19}NNaO_2$  ( $M + Na^+$ ) 400.1313, found 400.1346. Elem. Anal. Calcd for  $C_{26}H_{19}NO_2$ : C, 82.74; H, 5.07; N, 3.71; Found: C, 82.80; H, 4.77; N, 3.77.

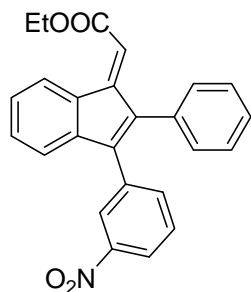

**(E)-Ethyl 2-(3-(3-nitrophenyl)-2-phenyl-1H-inden-1-ylidene)acetate (4e)**

Yield: 76% (61 mg), yellow solid, melting point: 167.7-167.9 °C.  $^1H$  NMR (500 MHz,  $CDCl_3$ )  $\delta$  1.33 (t,  $J = 7.1$  Hz, 3H), 4.30 (q,  $J = 7.1$  Hz, 2H), 6.22 (s, 1H), 7.14 – 7.15 (m, 2H), 7.22 (d,  $J = 8.3$  Hz, 1H), 7.31 – 7.36 (m, 5H), 7.44 (t,  $J = 7.8$  Hz, 1H), 7.51 (d,  $J = 8.3$  Hz, 1H), 8.12 (d,  $J = 8.5$  Hz, 1H), 8.17 (s, 1H), 8.73 (d,  $J = 6.5$  Hz, 1H);  $^{13}C$  NMR (125 MHz,  $CDCl_3$ )  $\delta$  14.2, 60.9, 119.8, 121.7, 122.6, 124.0, 127.5, 127.7, 128.0, 128.4, 129.2, 130.0, 130.7, 132.9, 133.0, 135.3, 135.7, 141.3, 142.1, 143.2, 148.2, 151.3, 166.1; IR (KBr):  $\nu_{max}/cm^{-1}$  3062, 2982, 1717, 1627, 1530, 1455; MS (ESI):  $m/z$  398 ( $M^+ + 1$ ); HRMS (ESI) calcd for  $C_{25}H_{20}NO_4$  ( $M + H^+$ ) 398.1392, found 398.1425. Elem. Anal. Calcd for  $C_{25}H_{19}NO_4$ : C, 75.55; H, 4.82; N, 3.52; Found: C, 75.66; H, 4.56; N, 3.49.



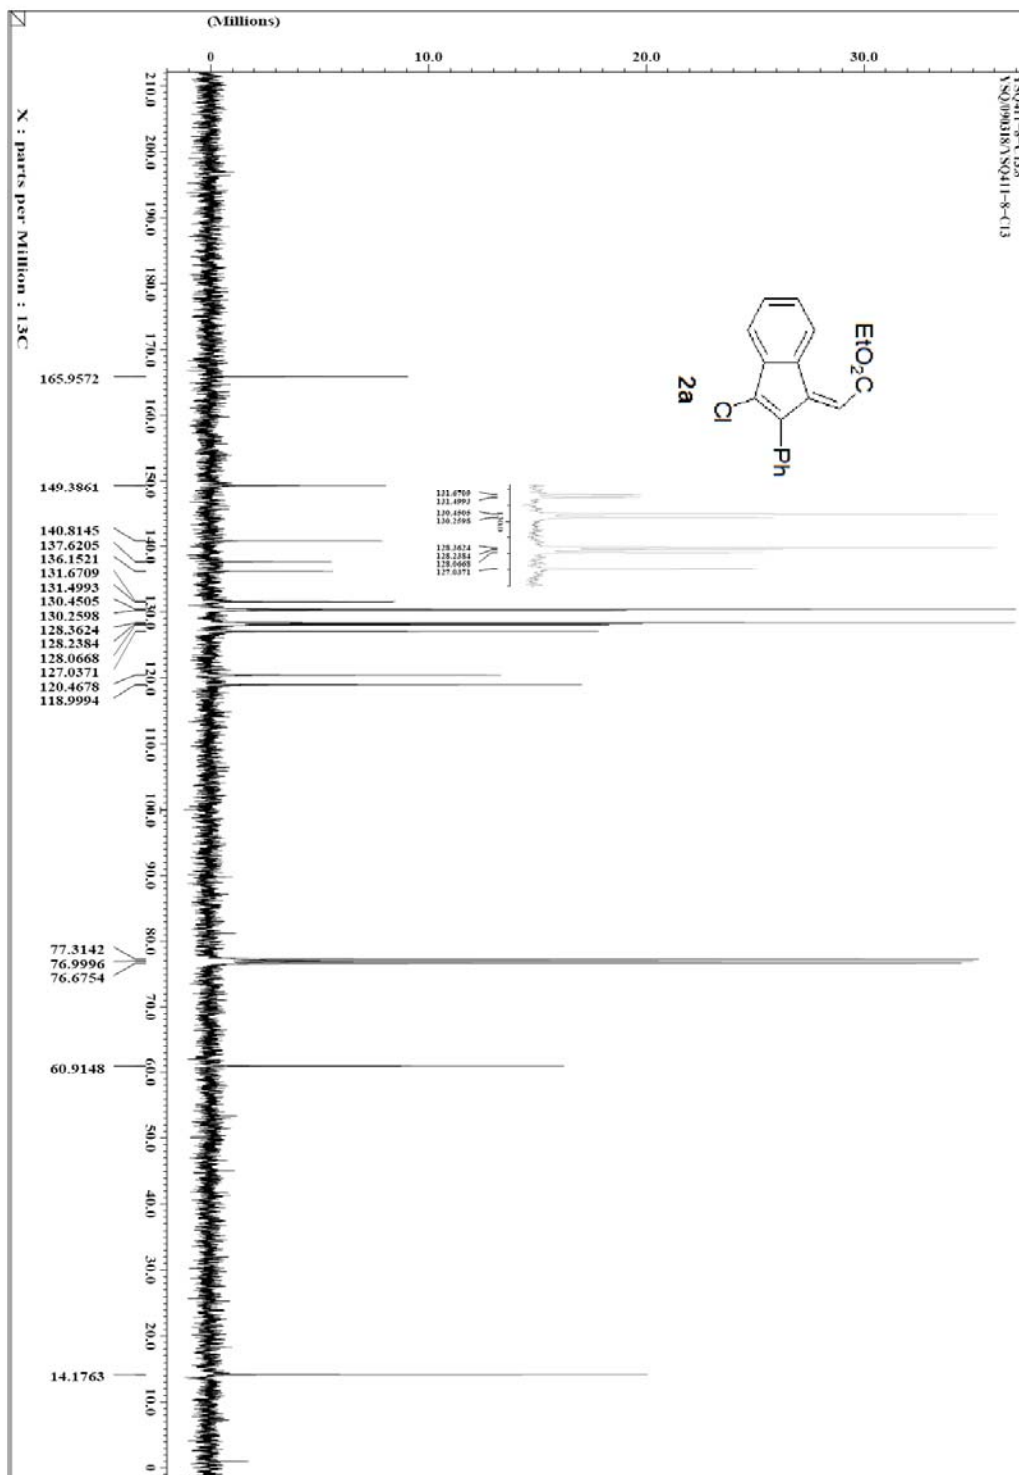

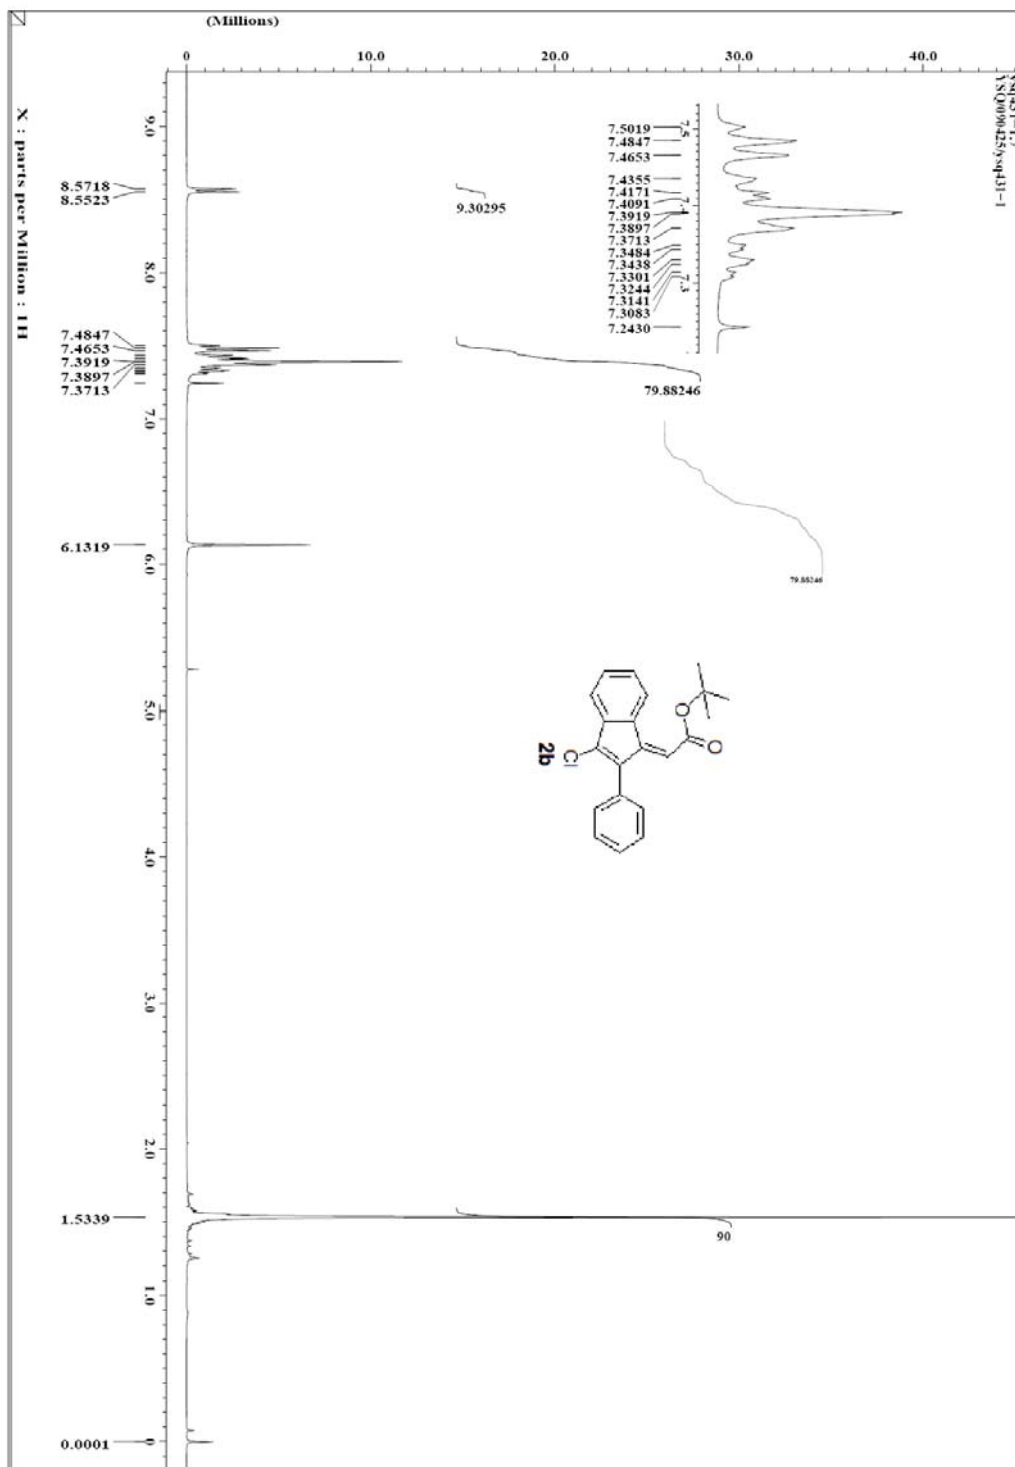

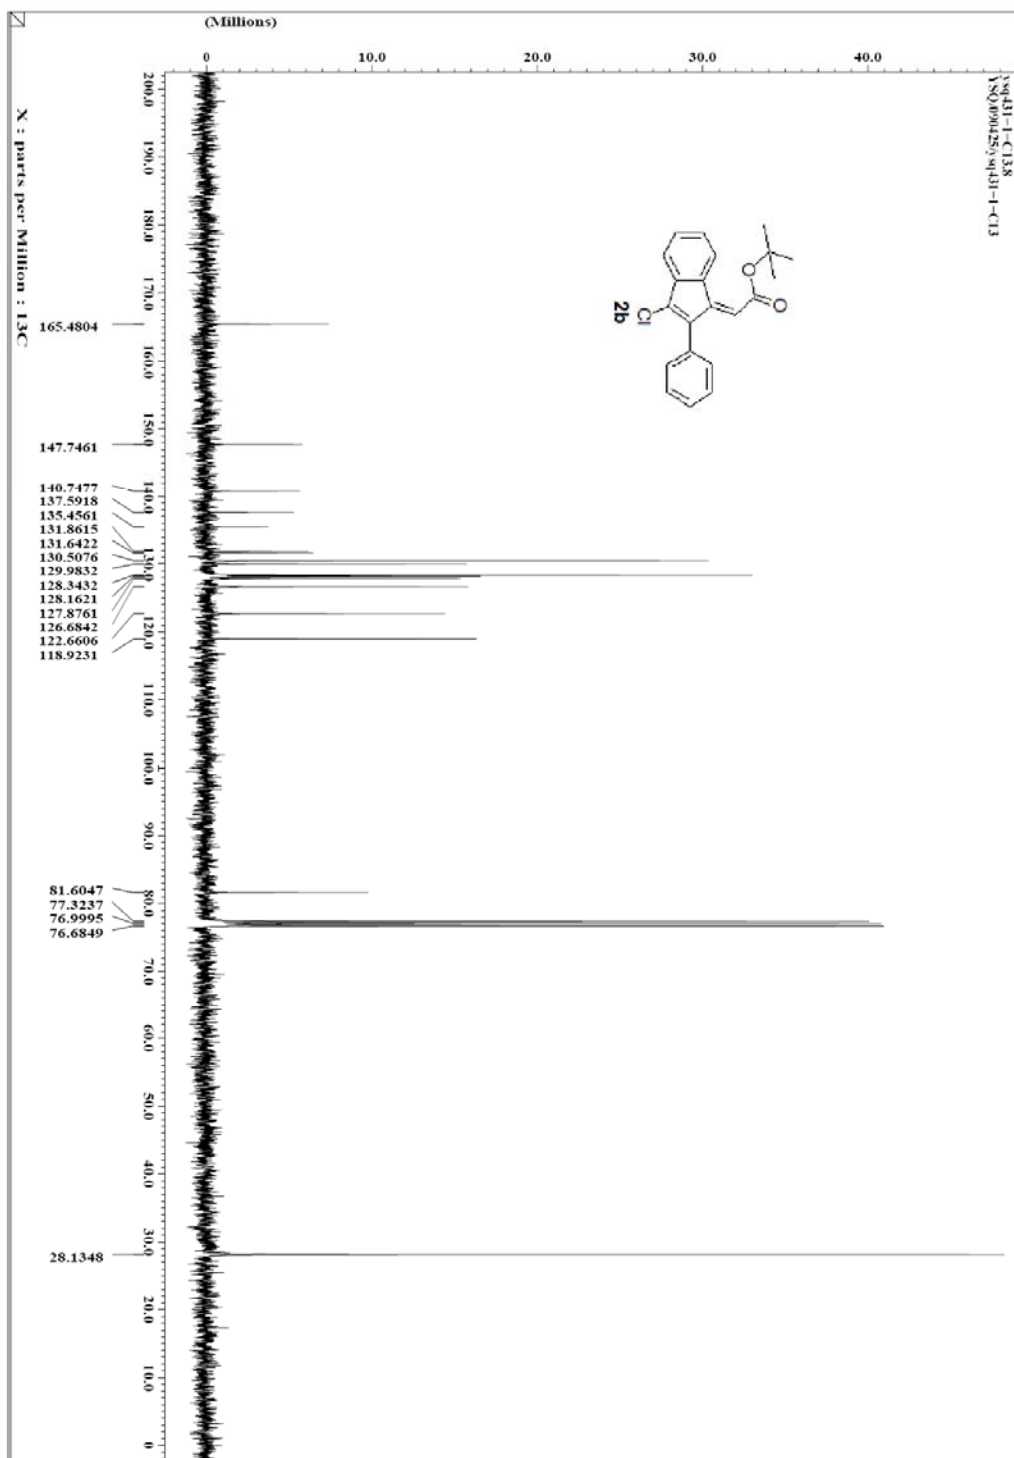



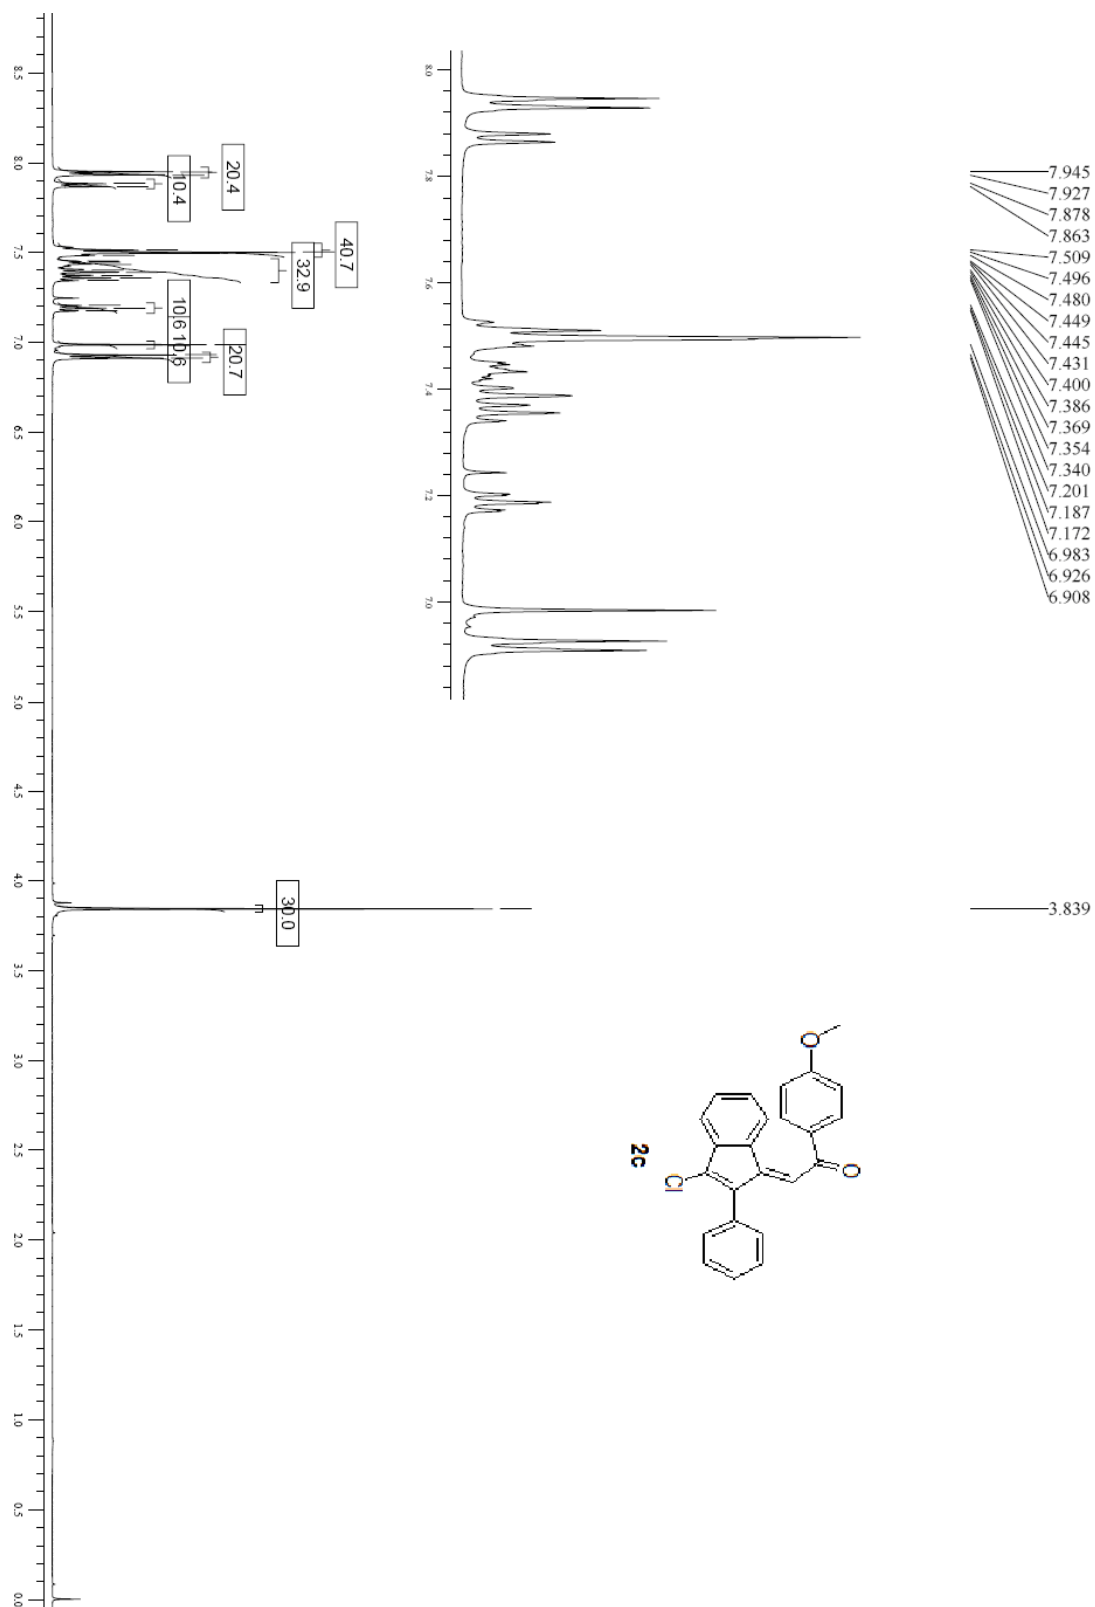

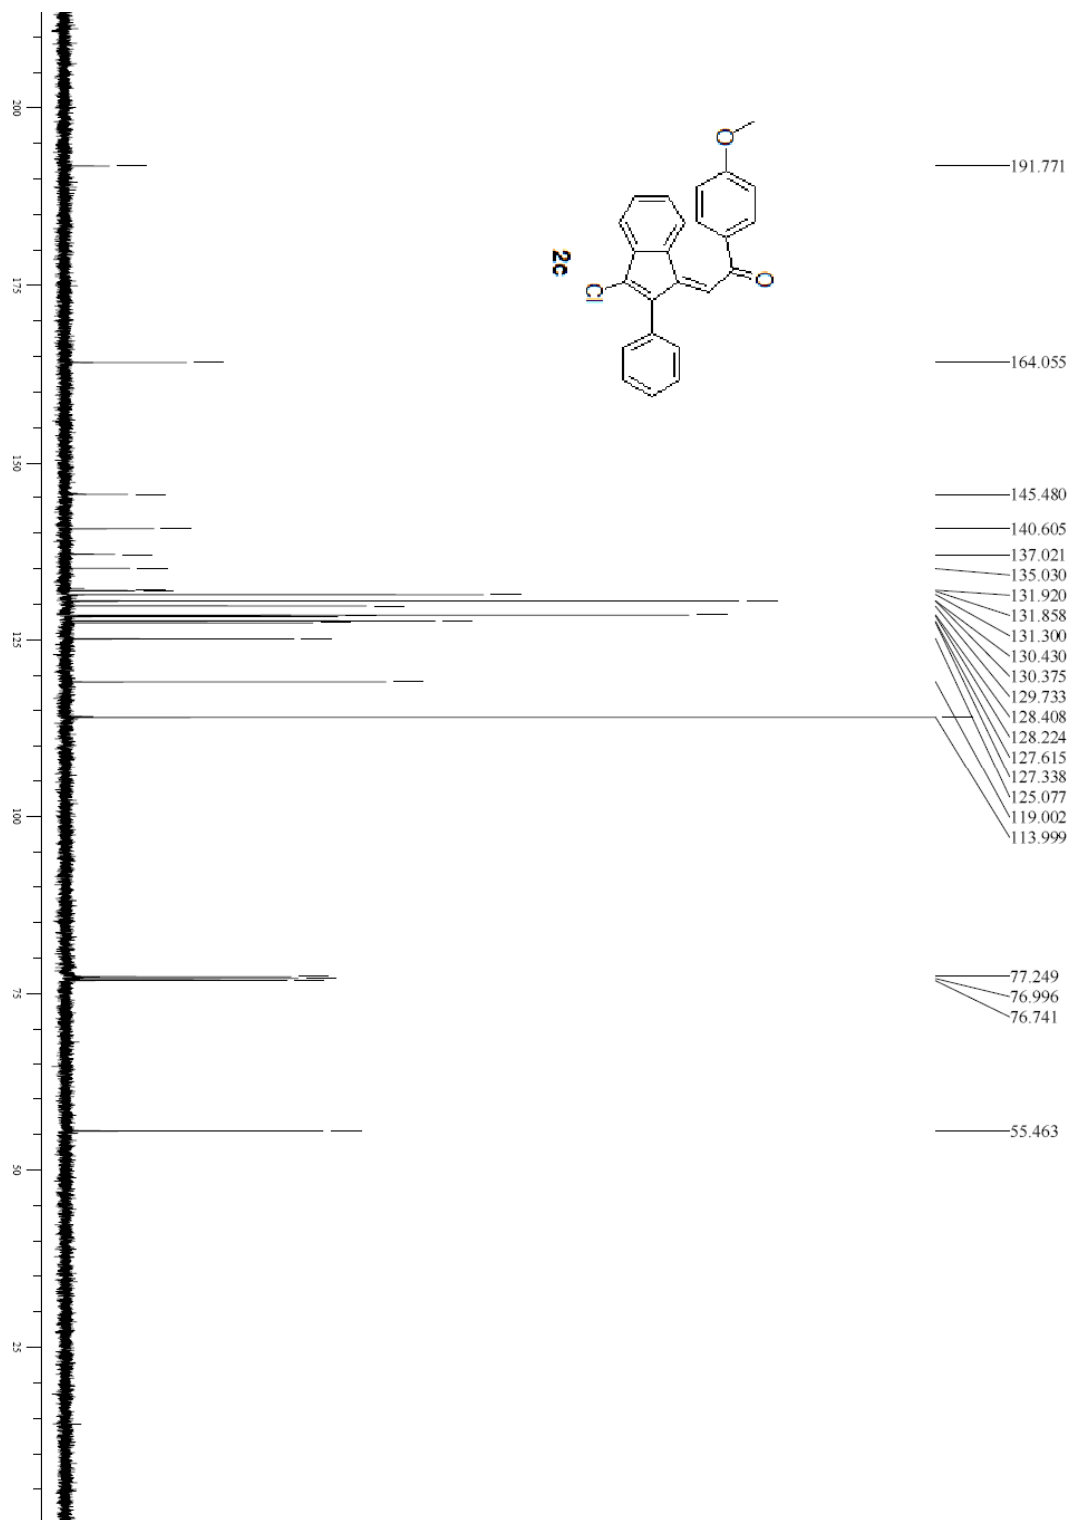

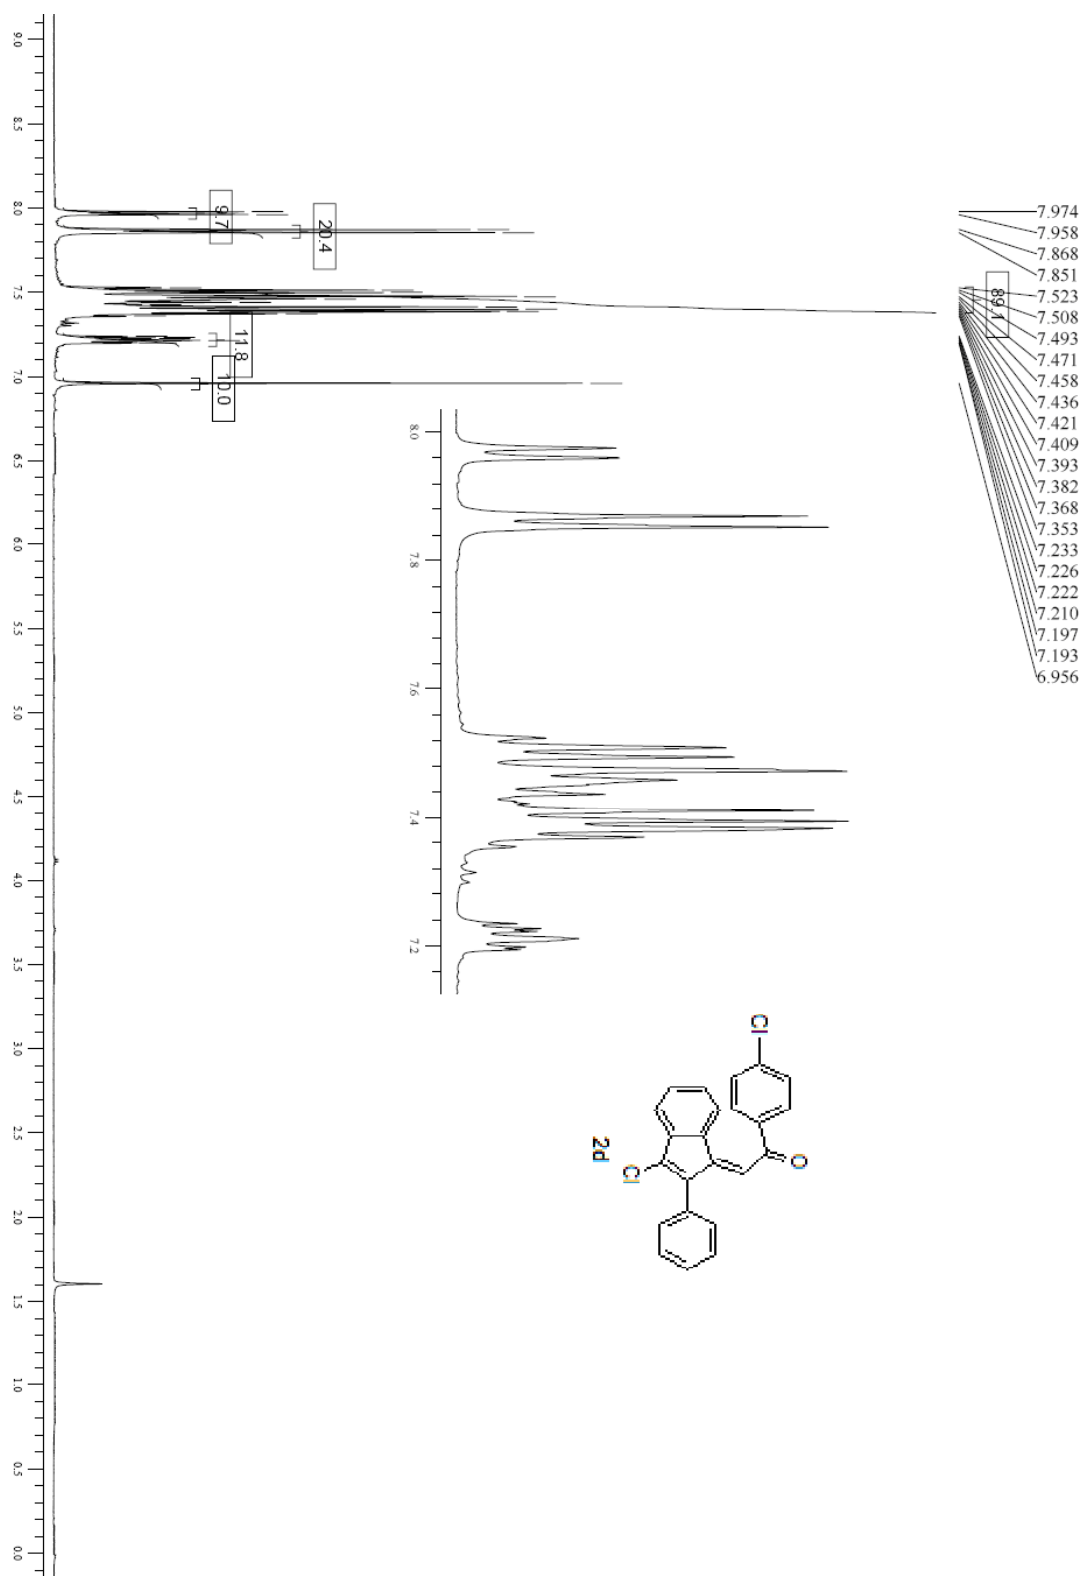

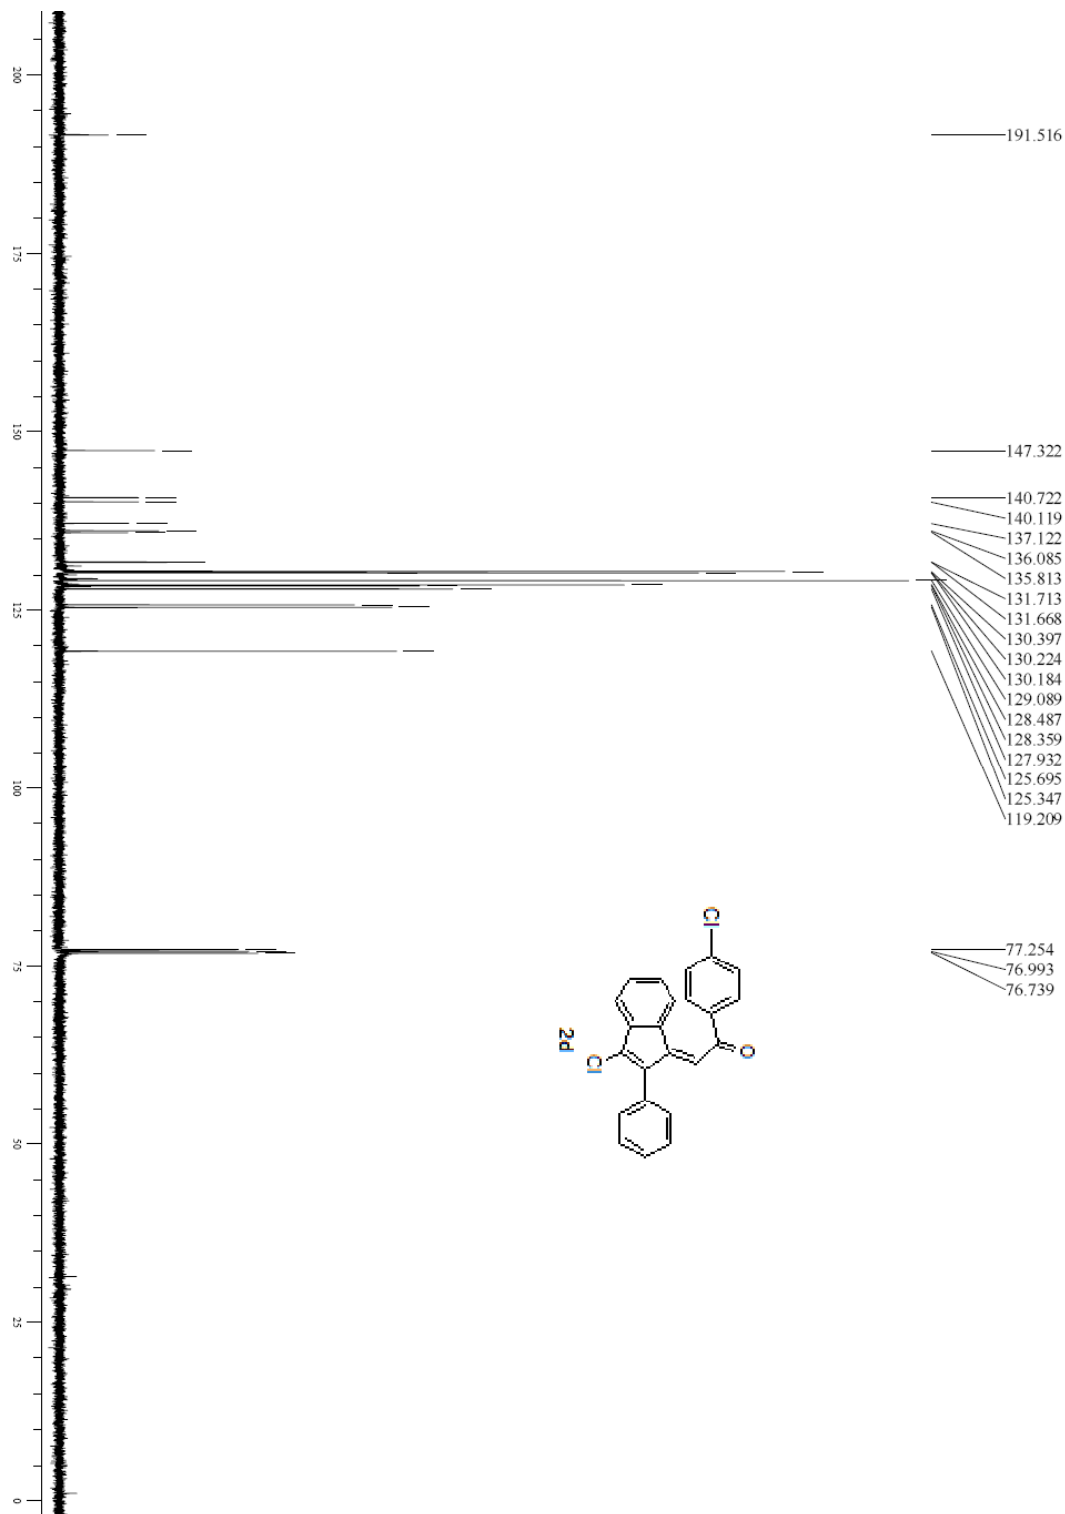



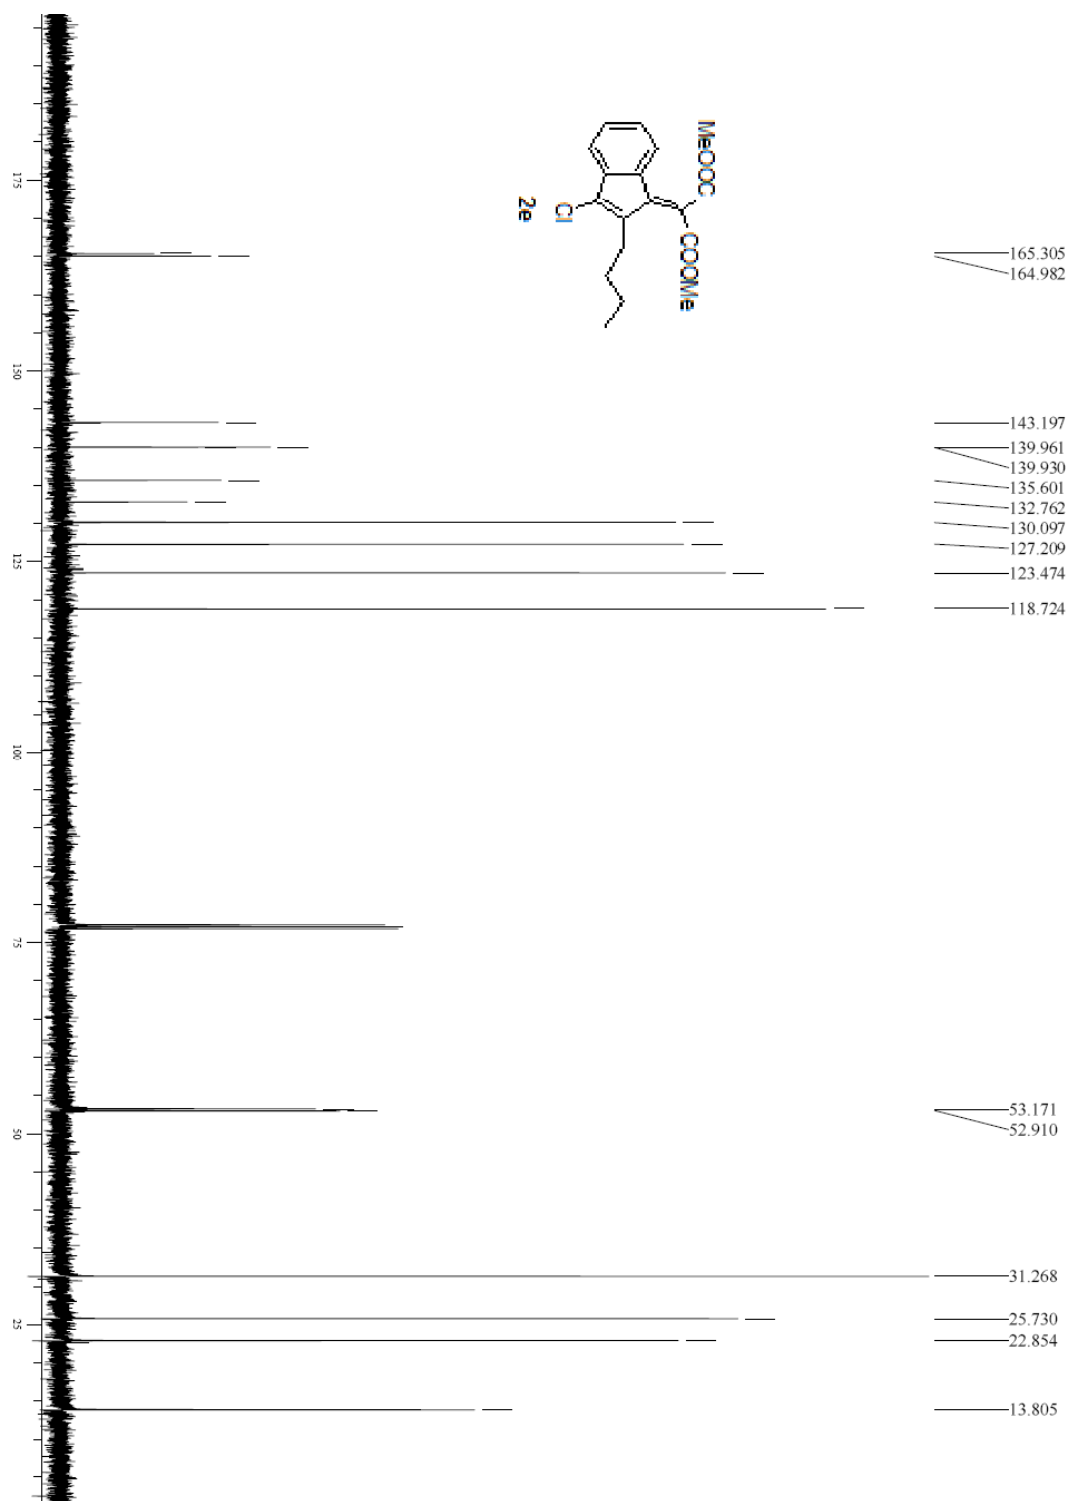

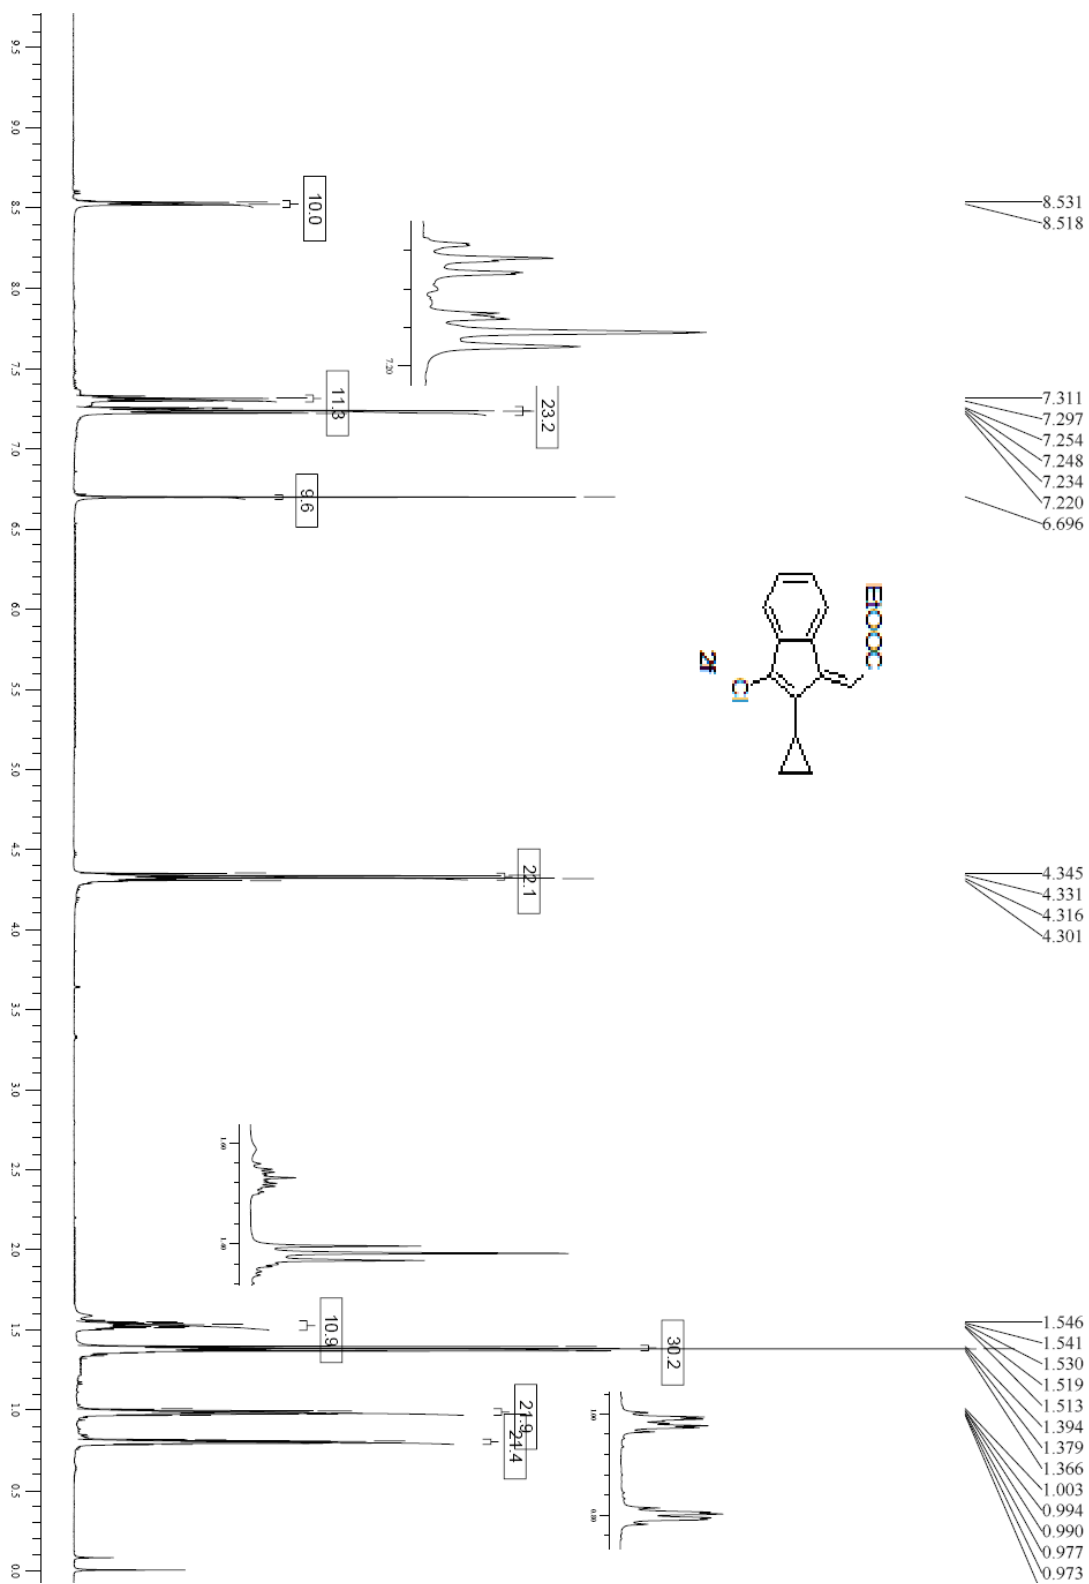

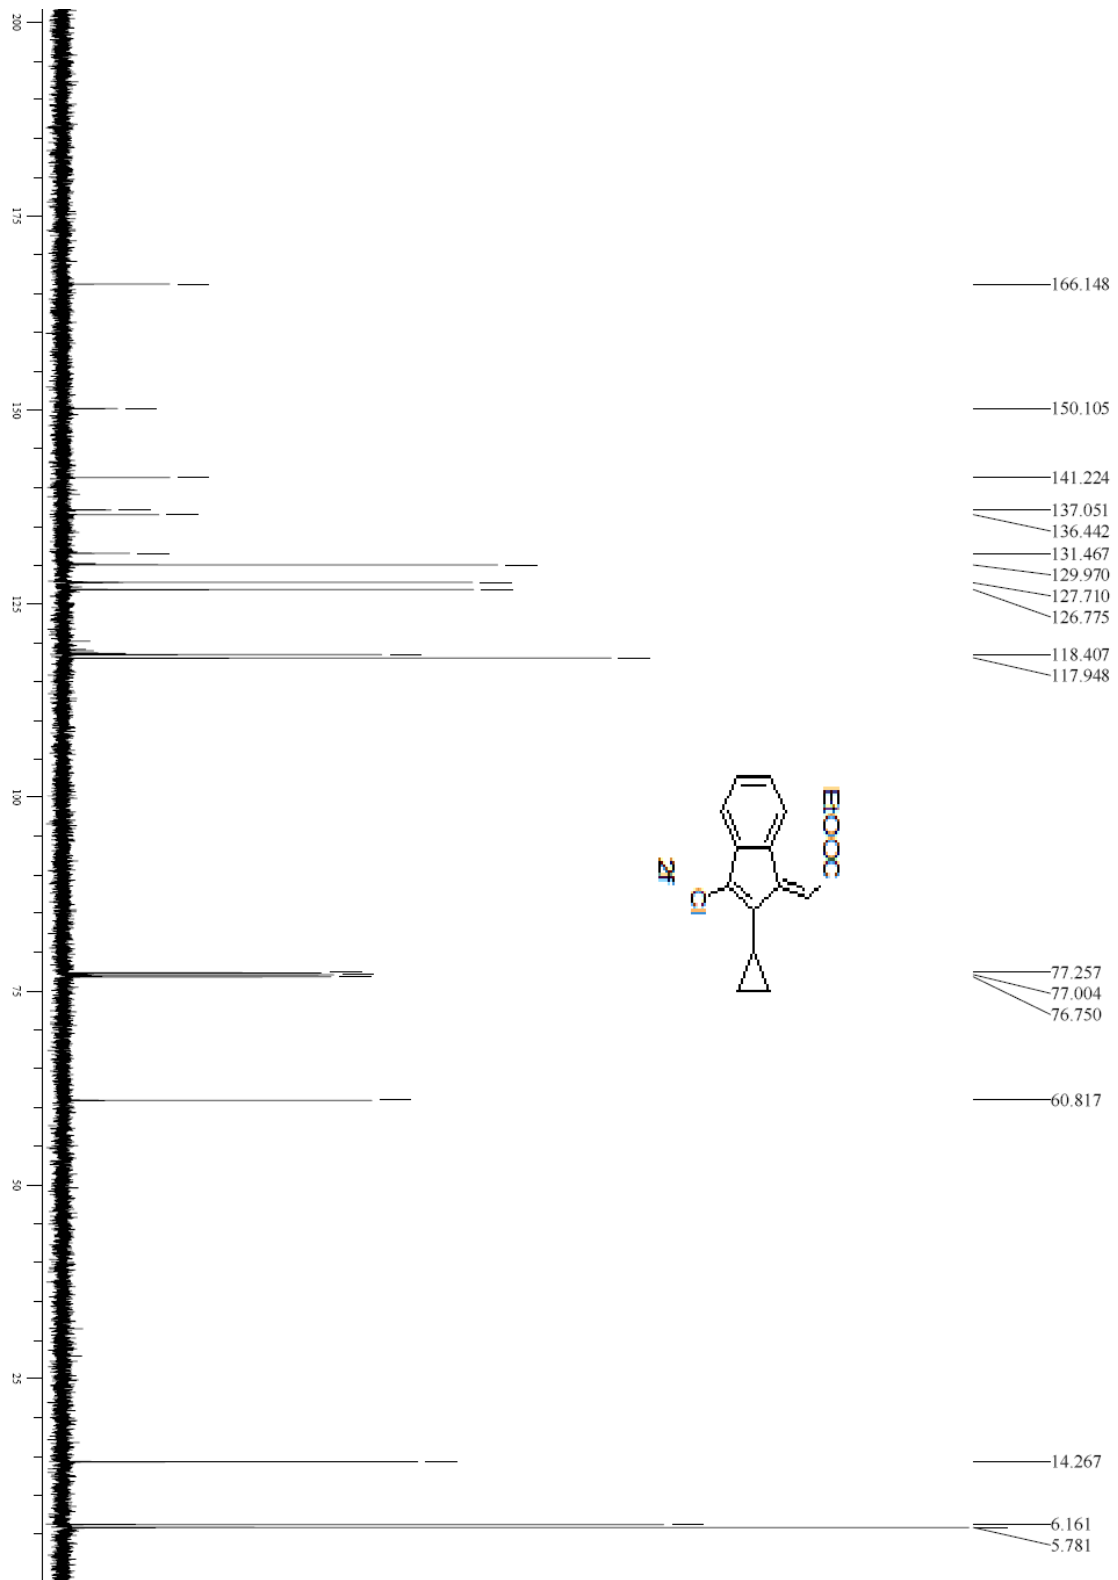



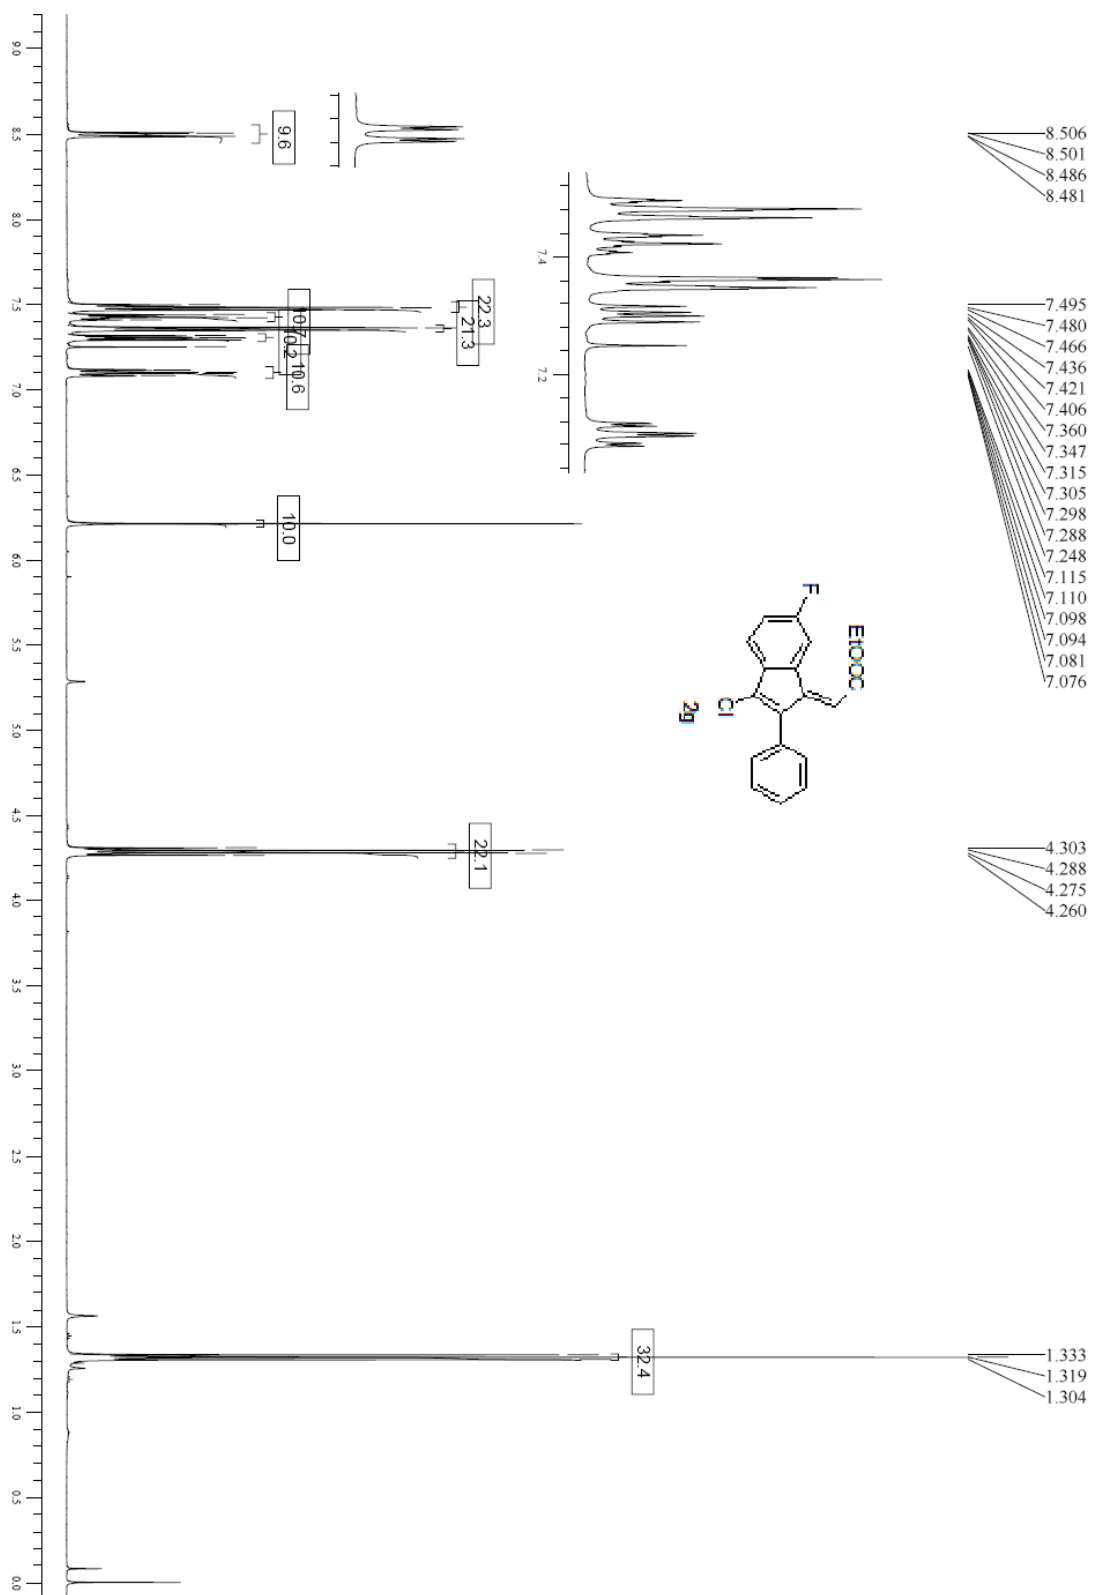

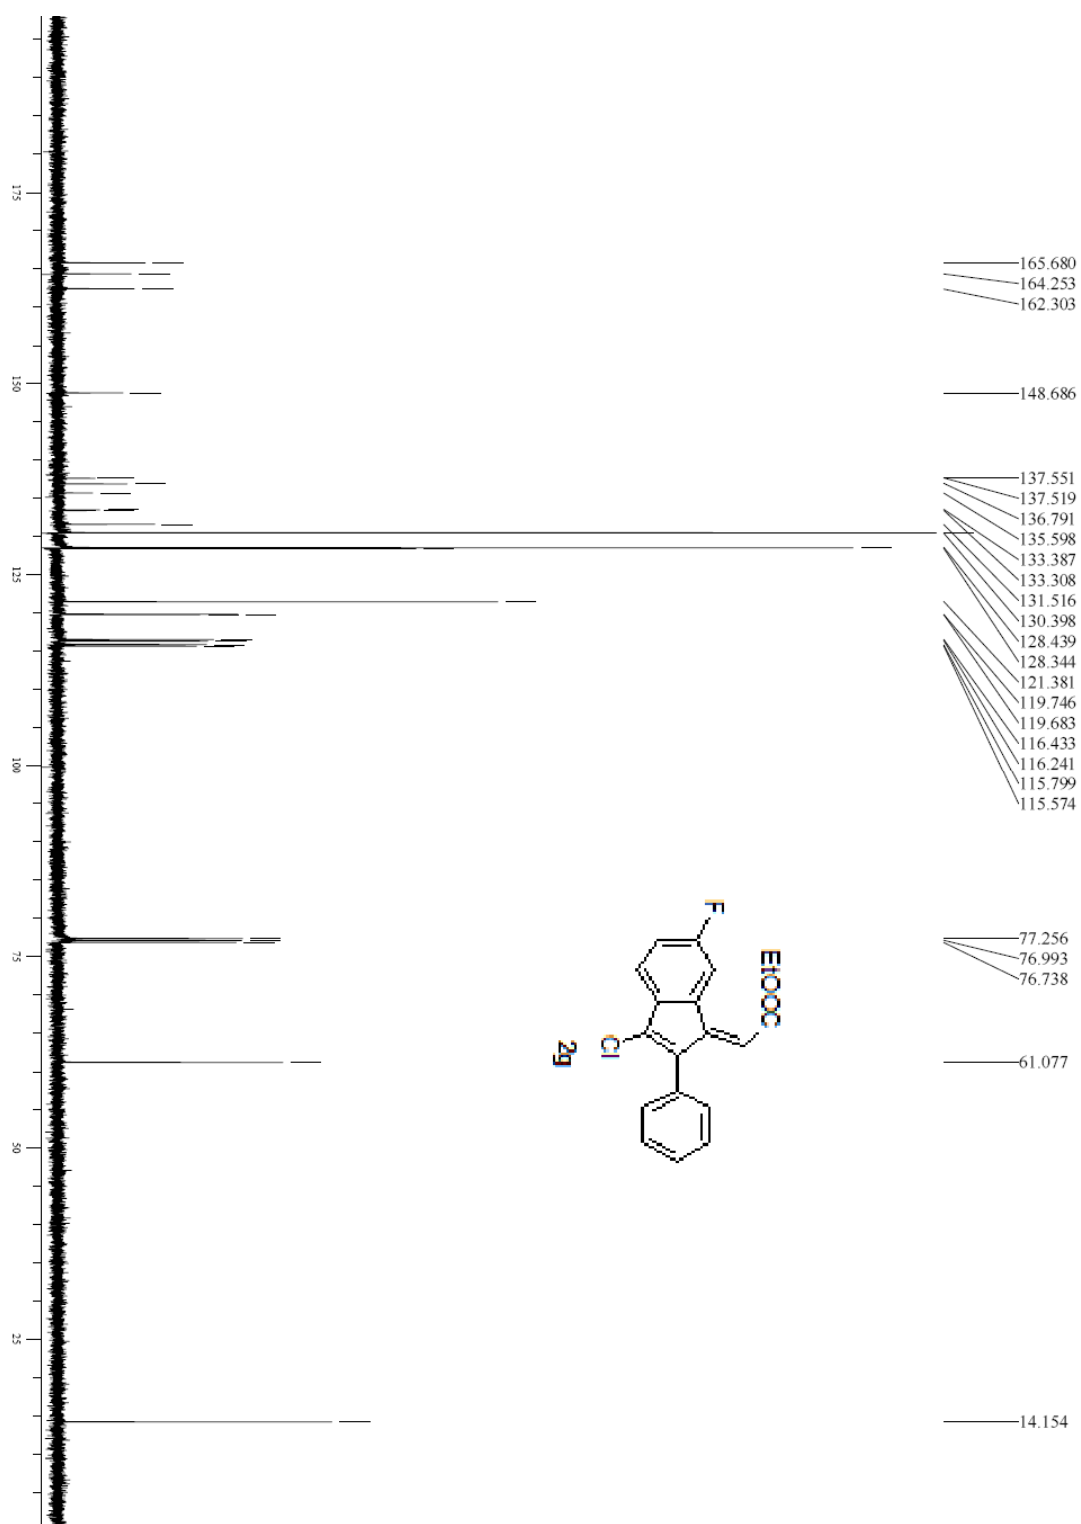

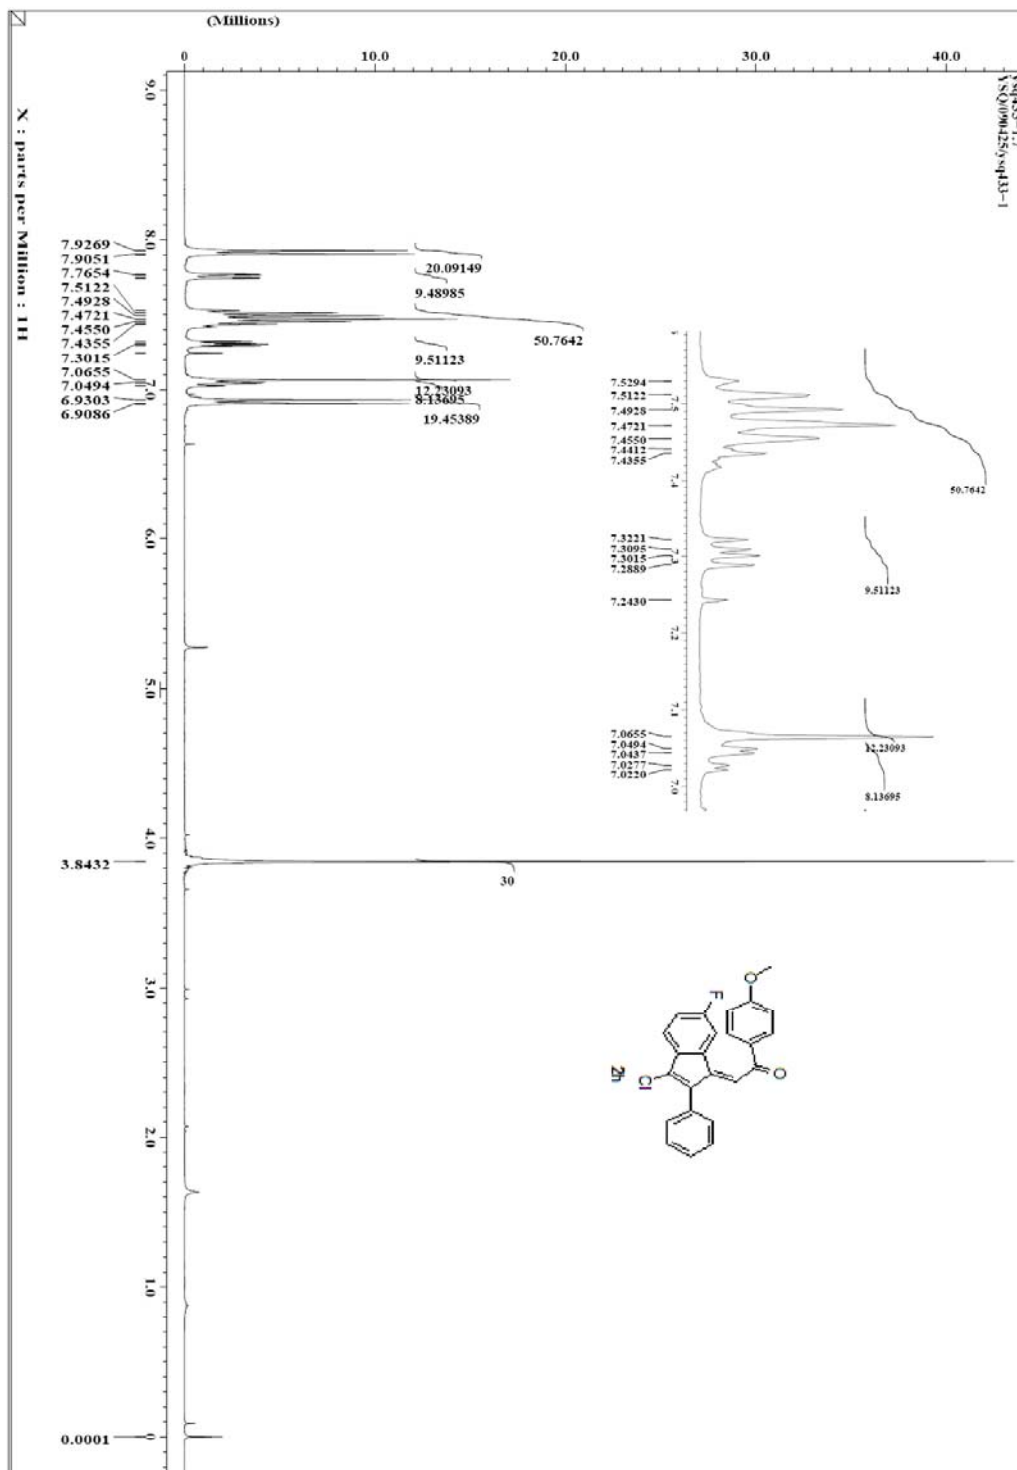

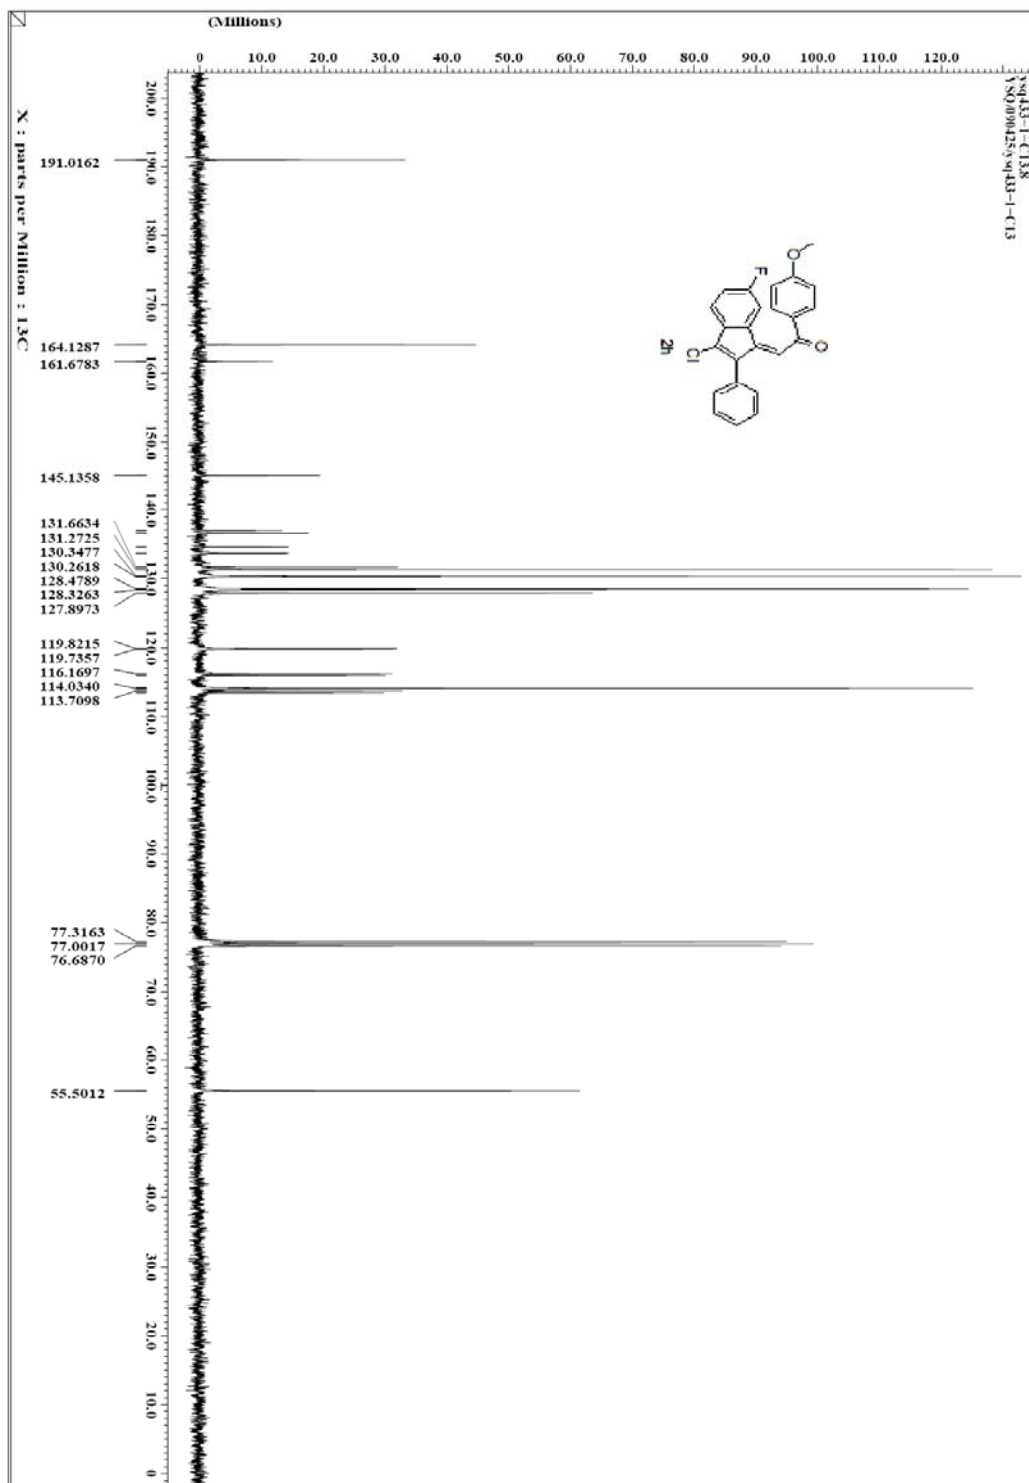

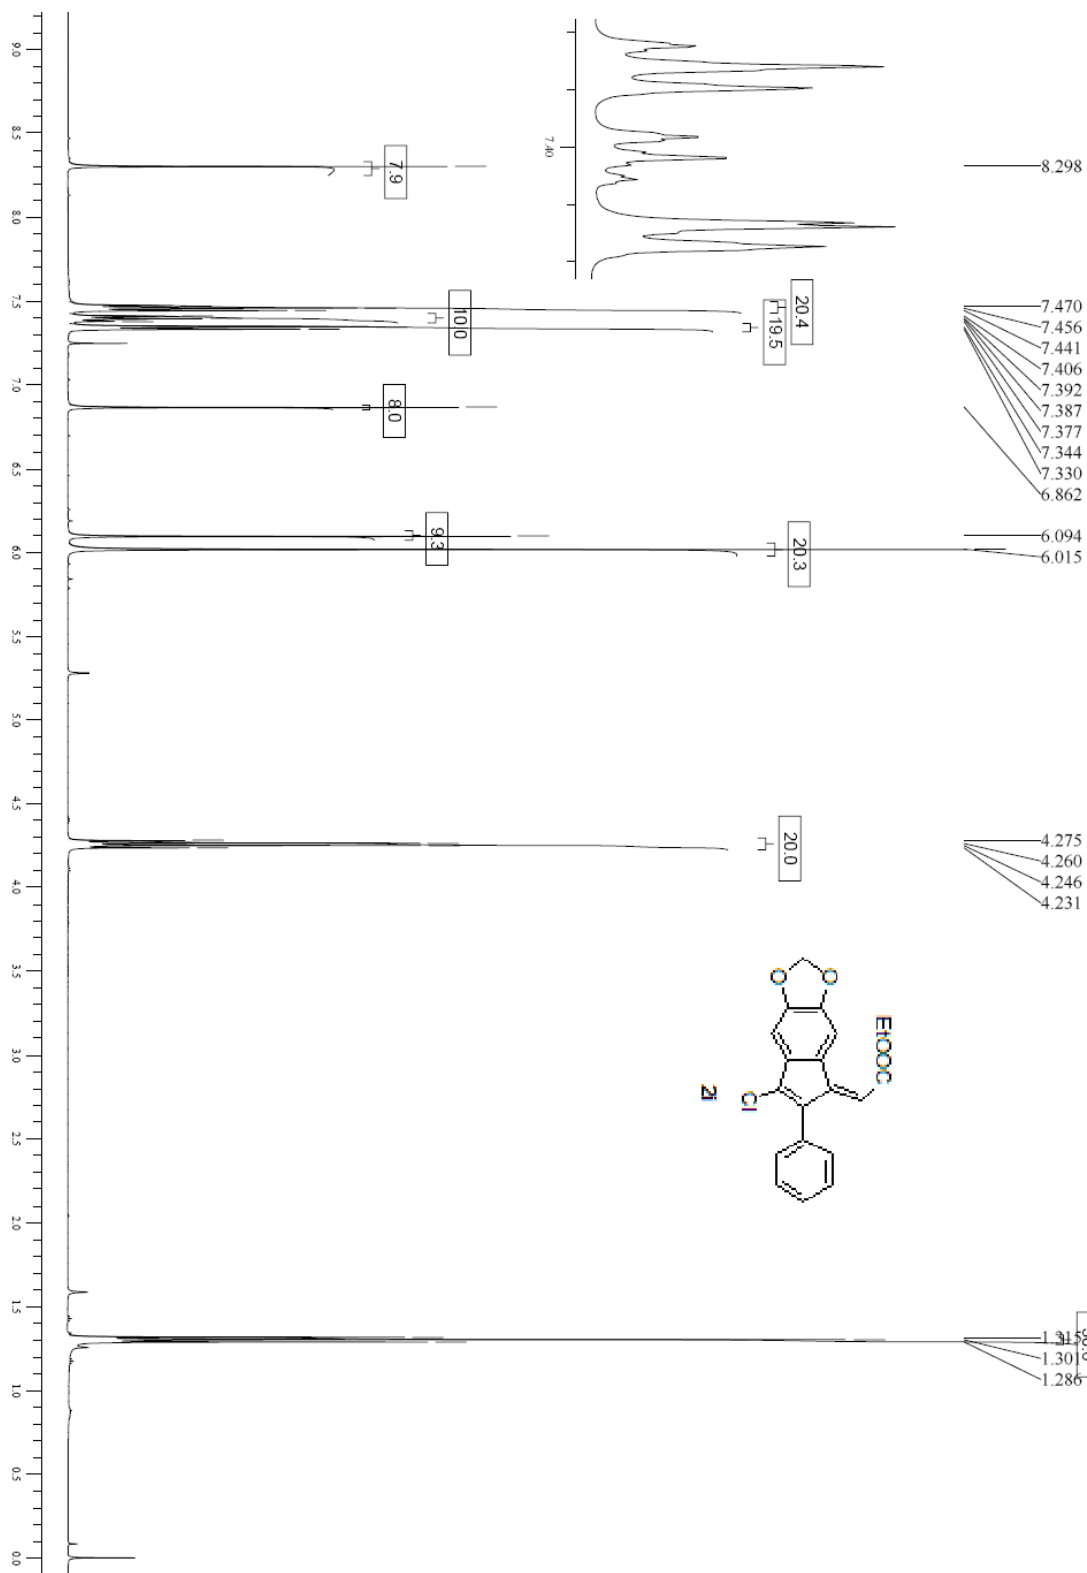

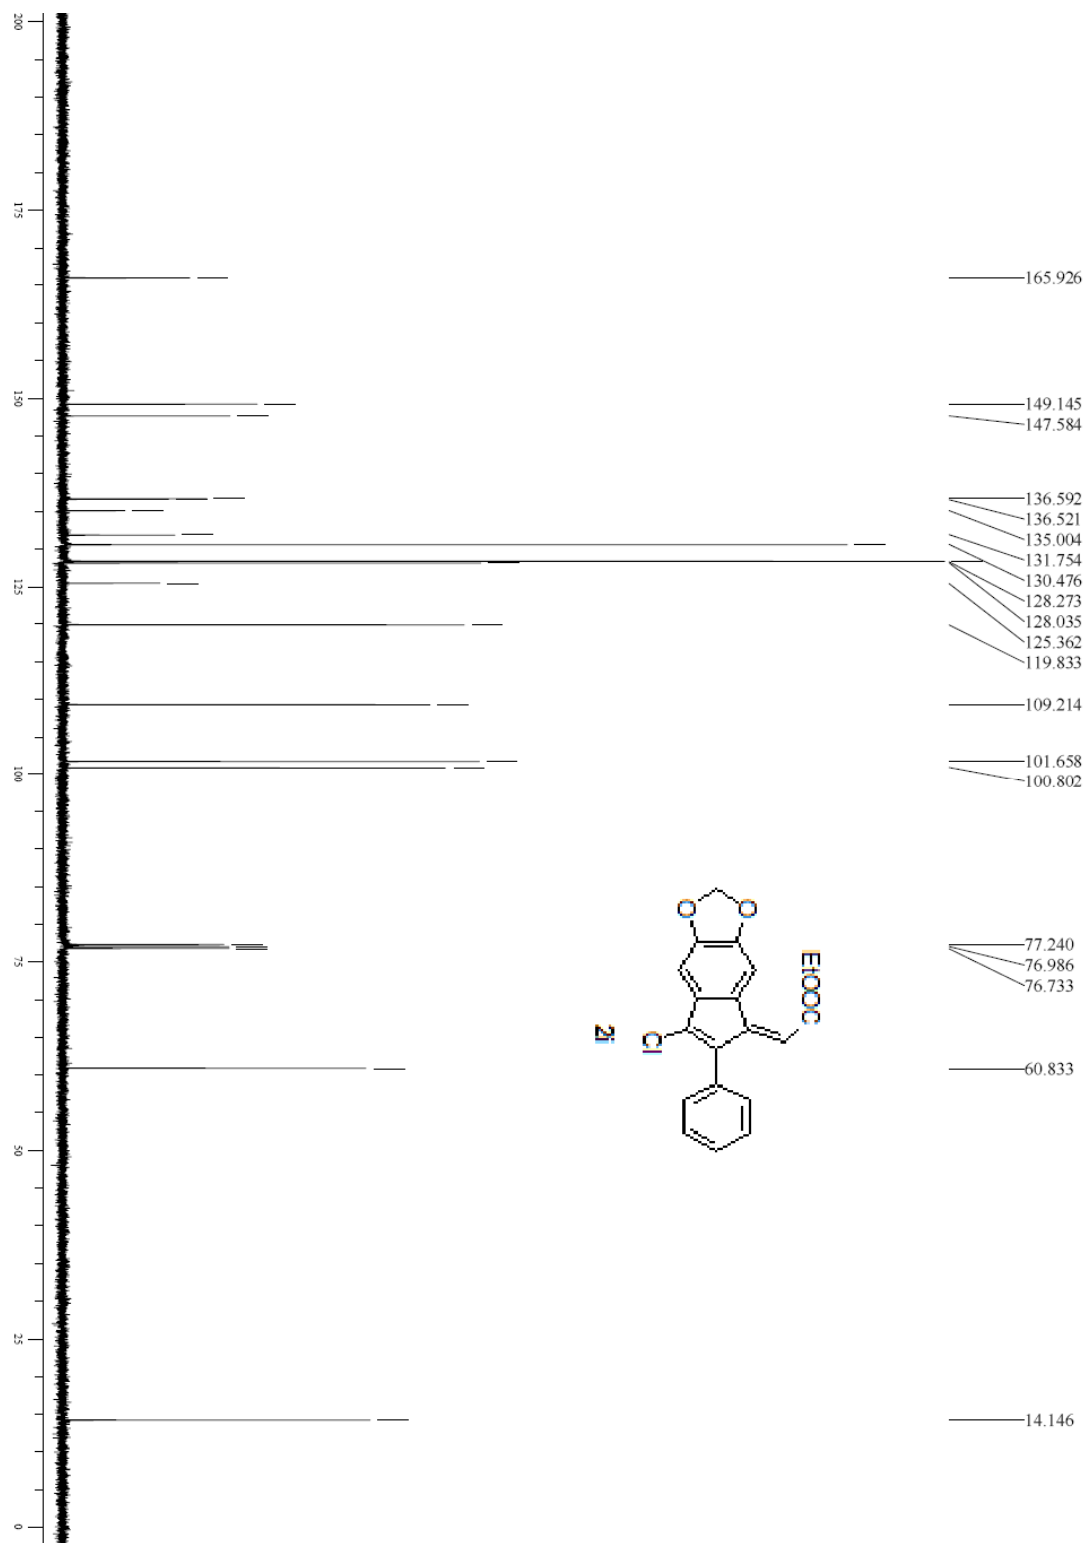

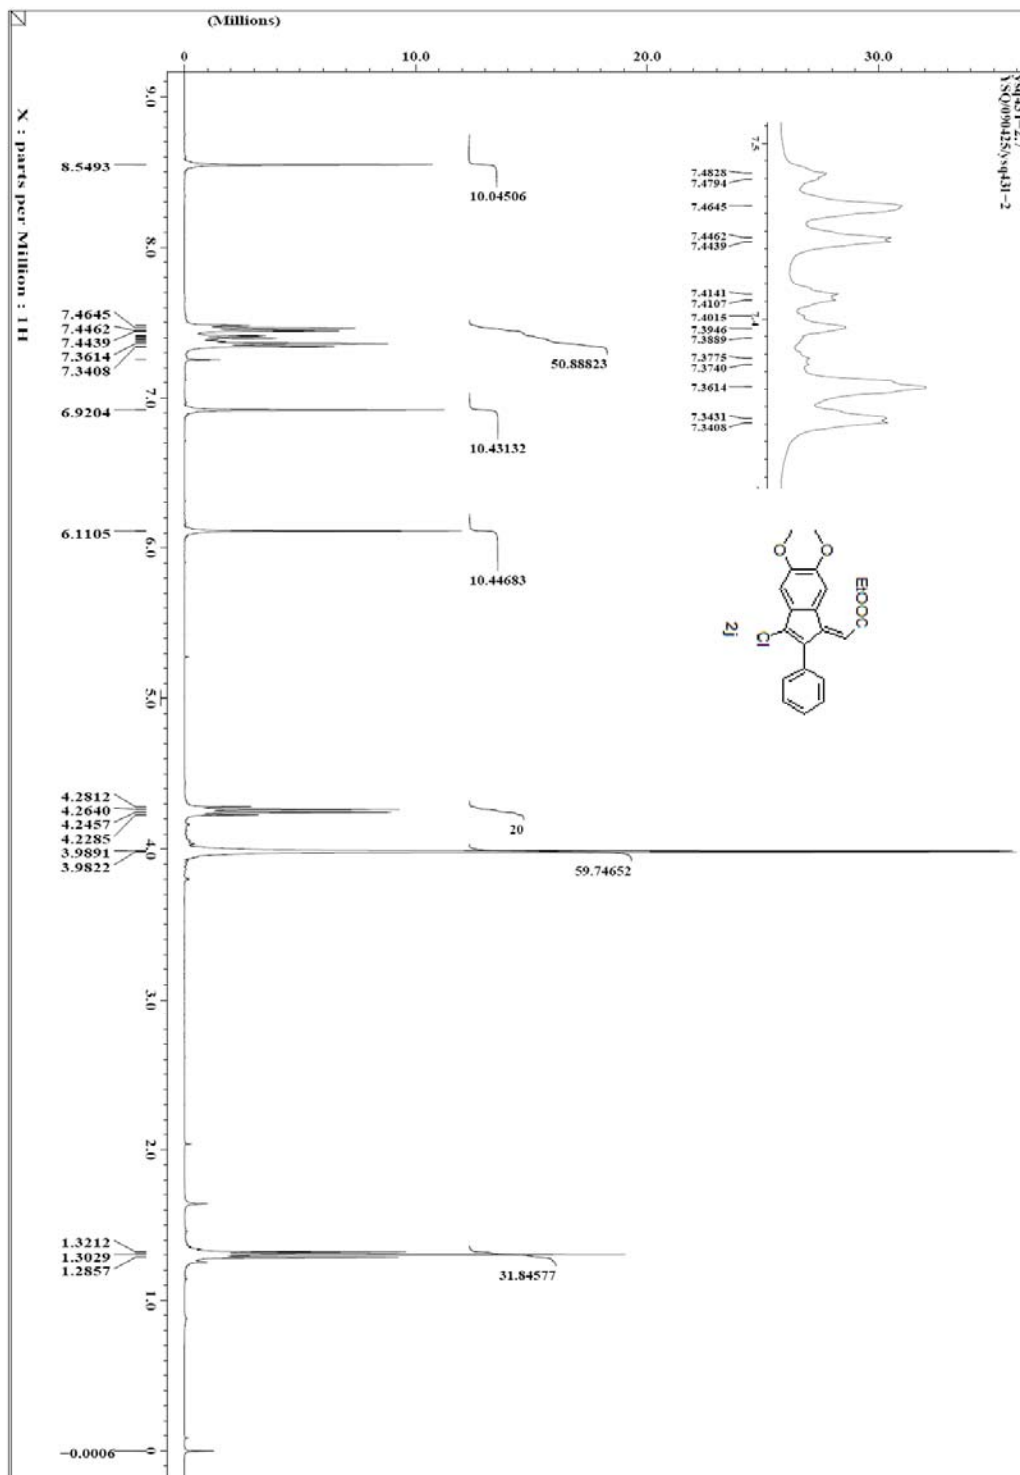

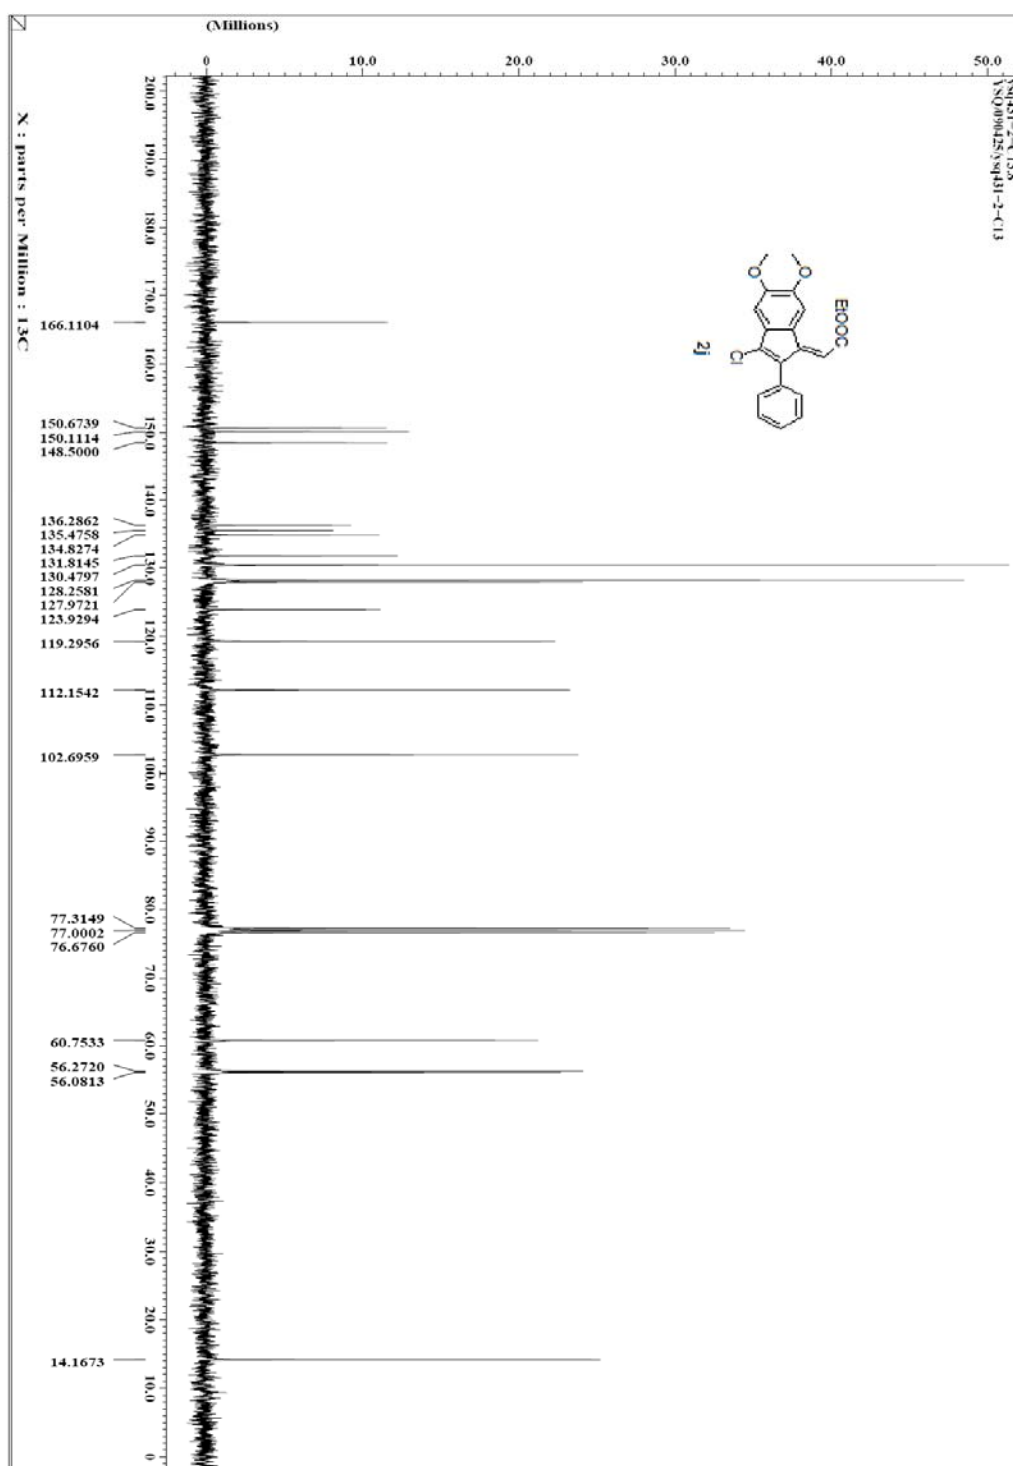



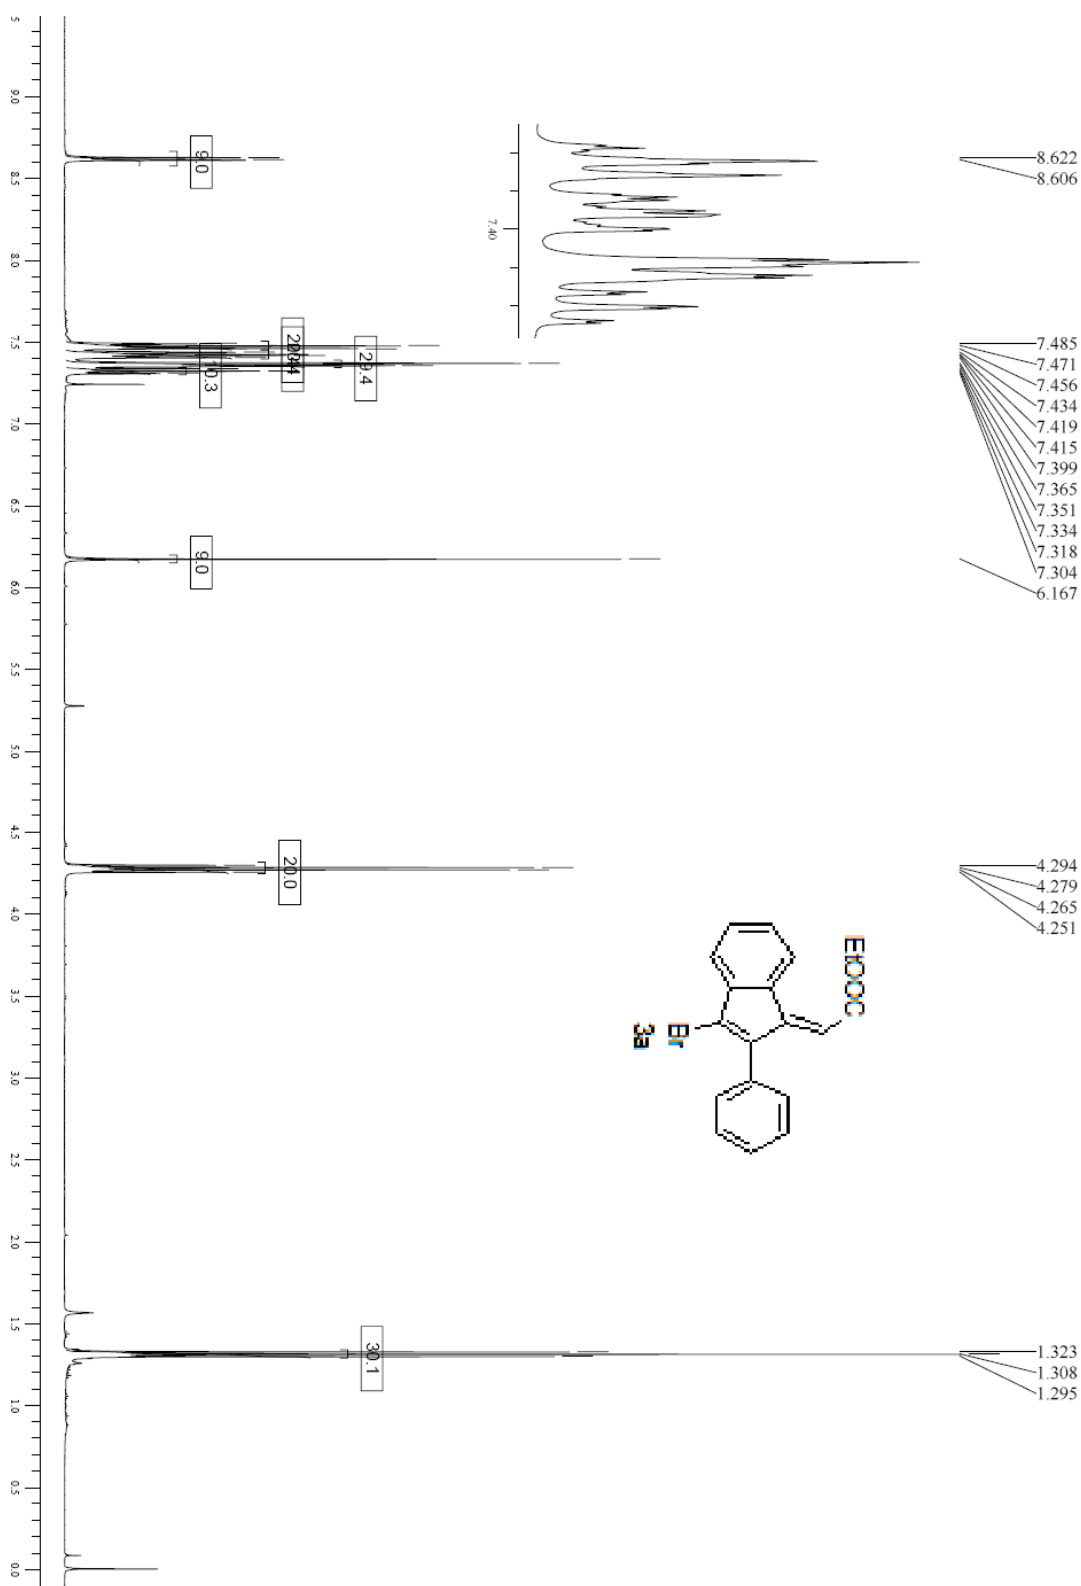

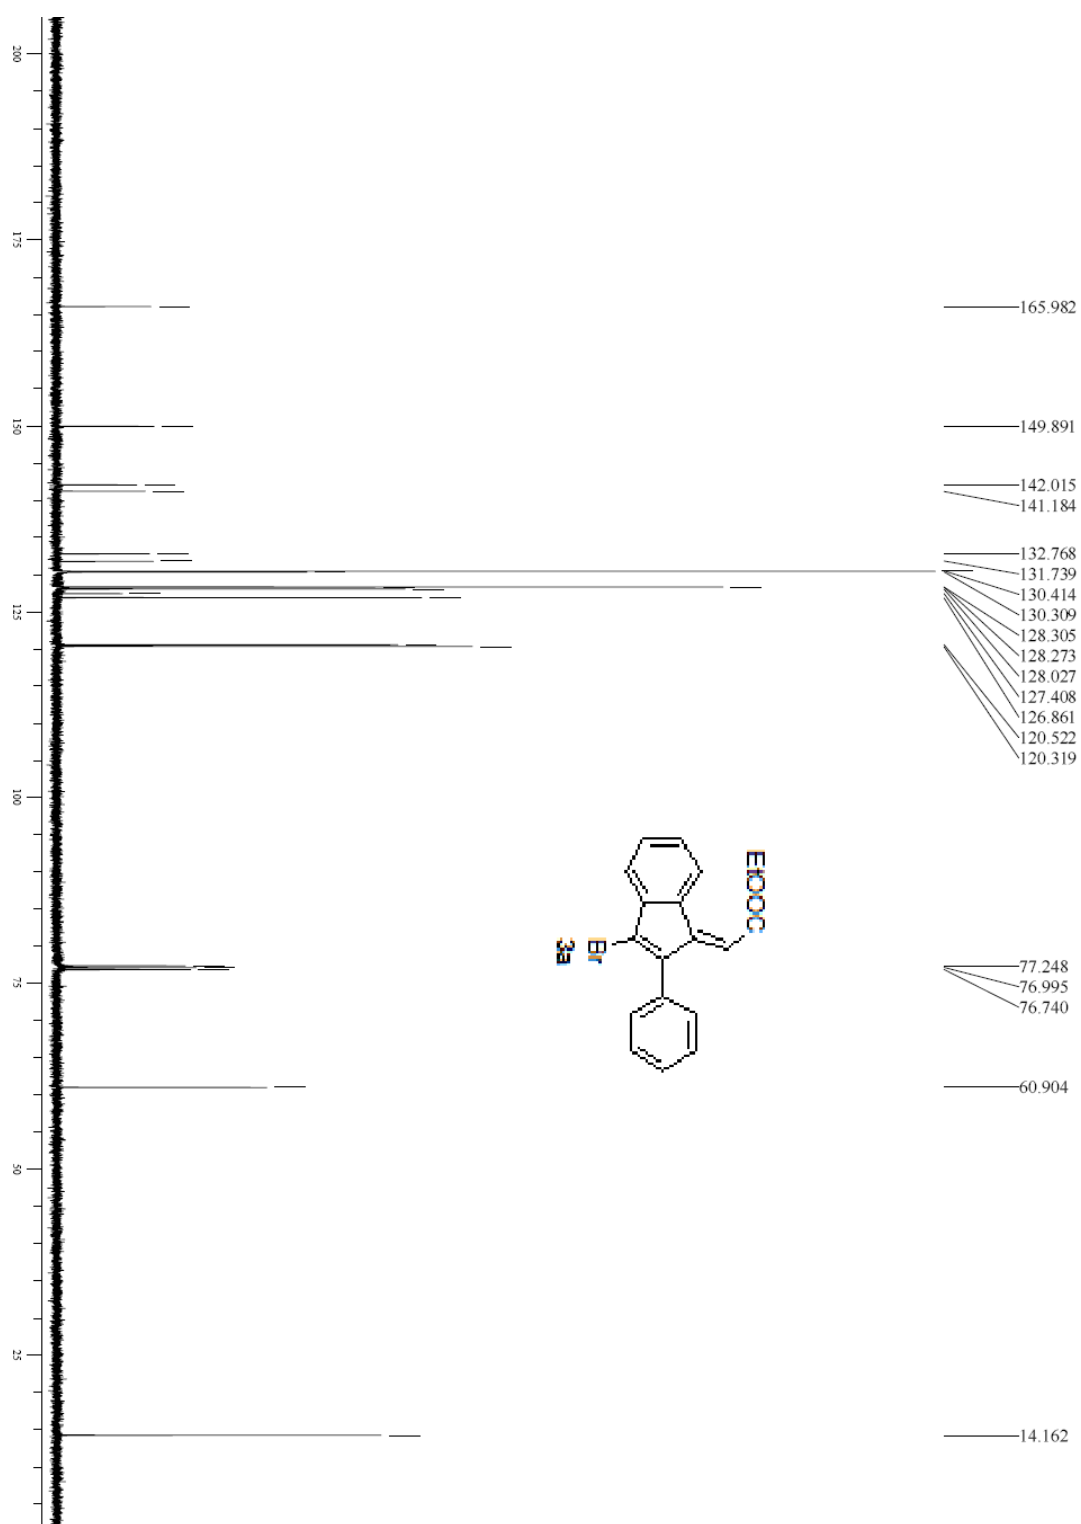

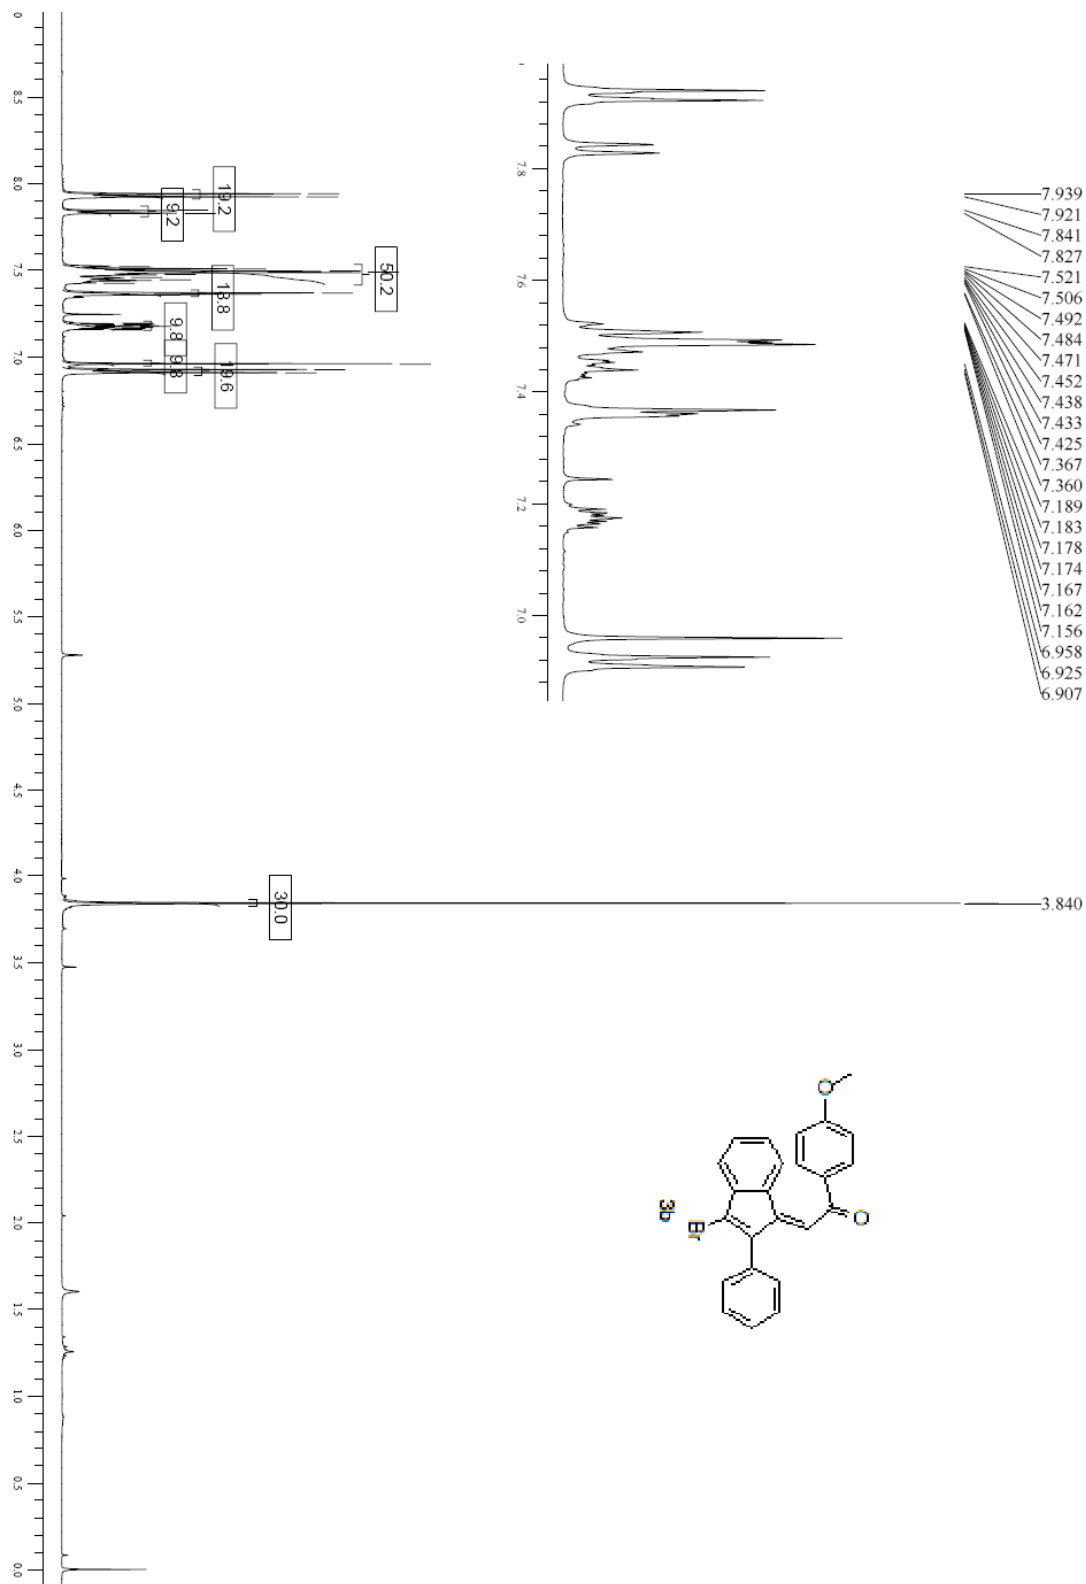

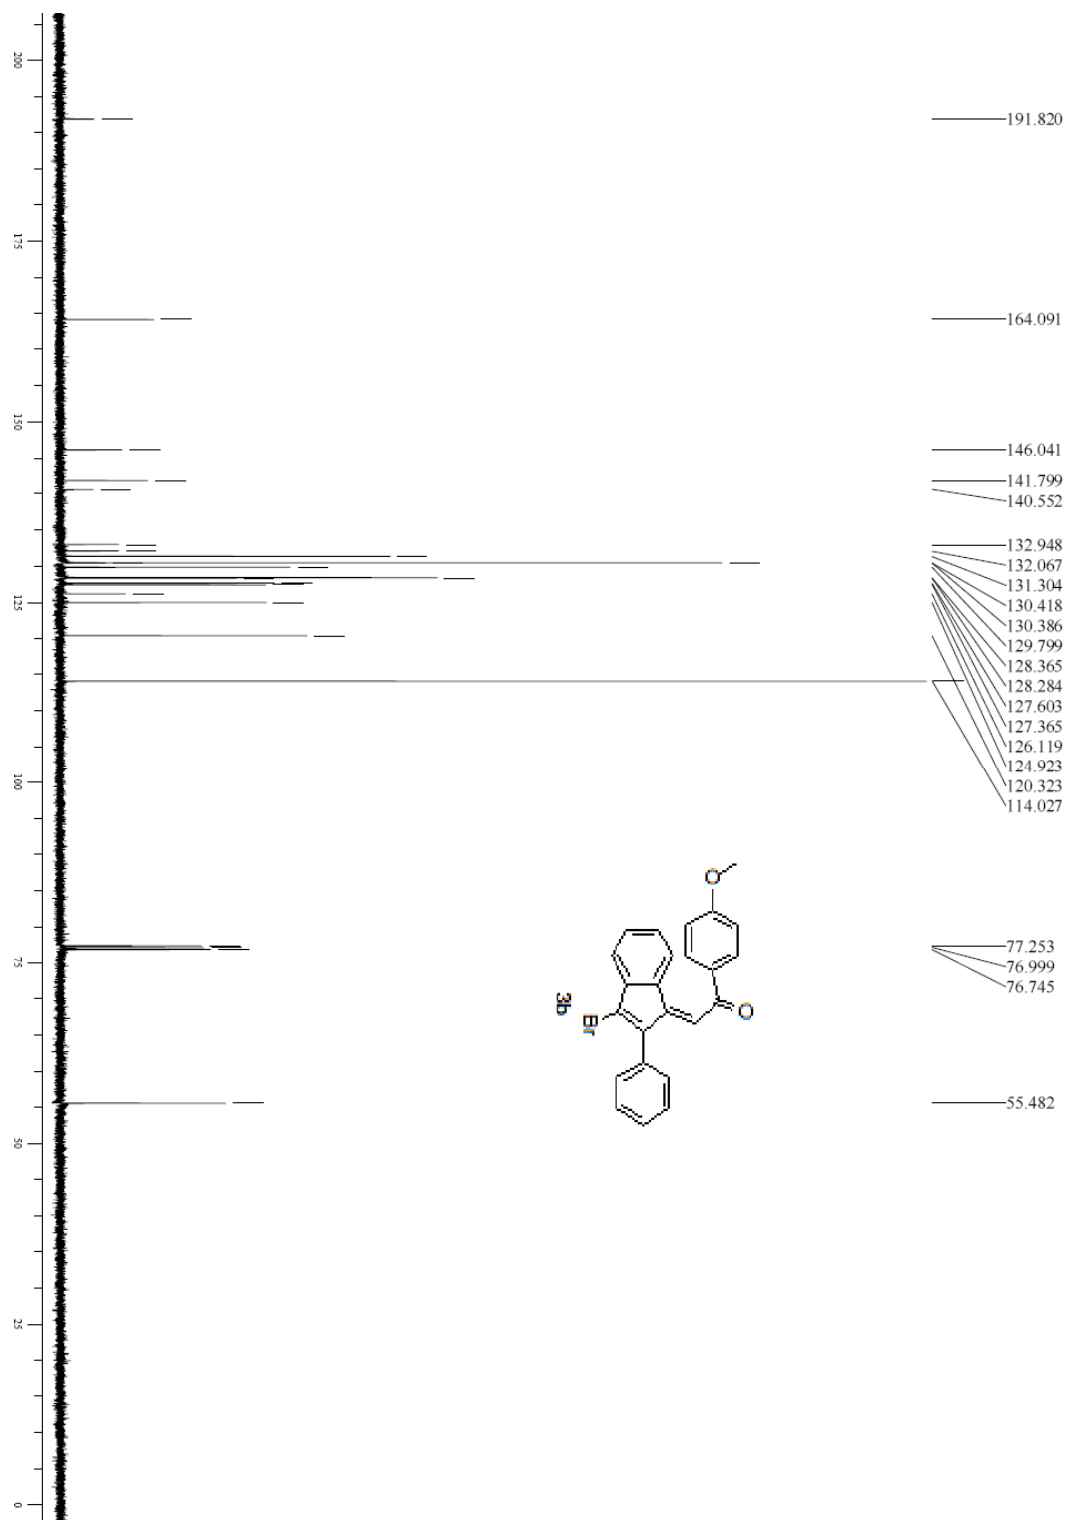

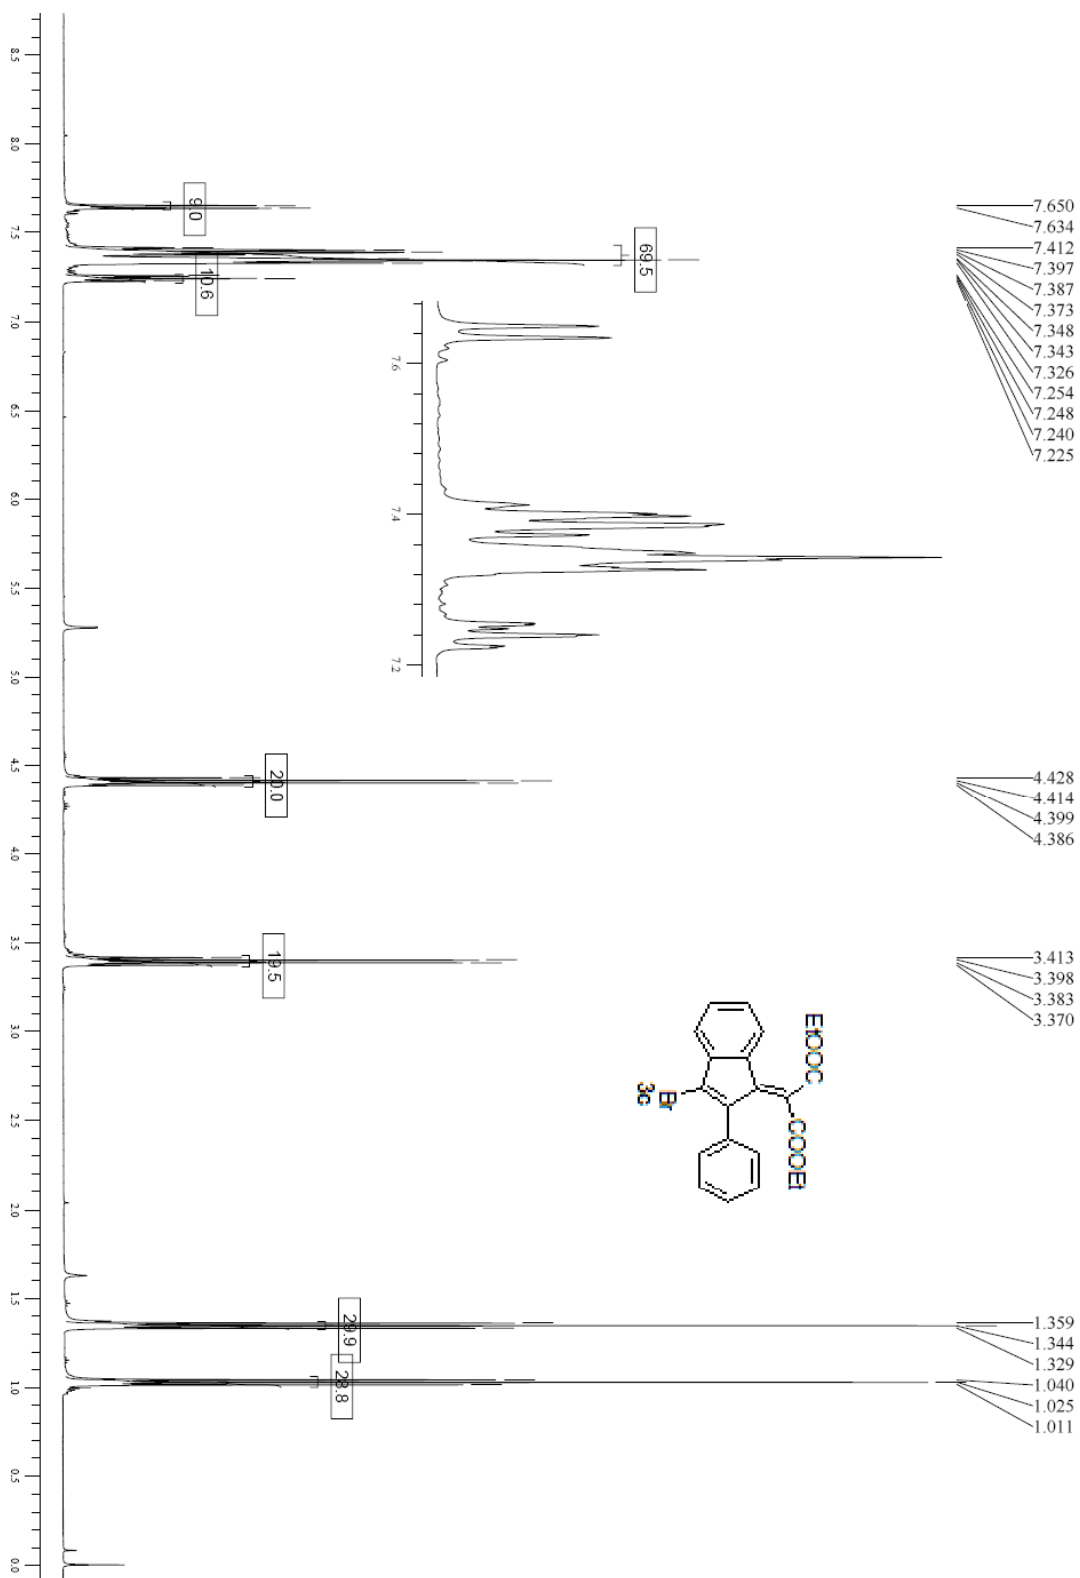

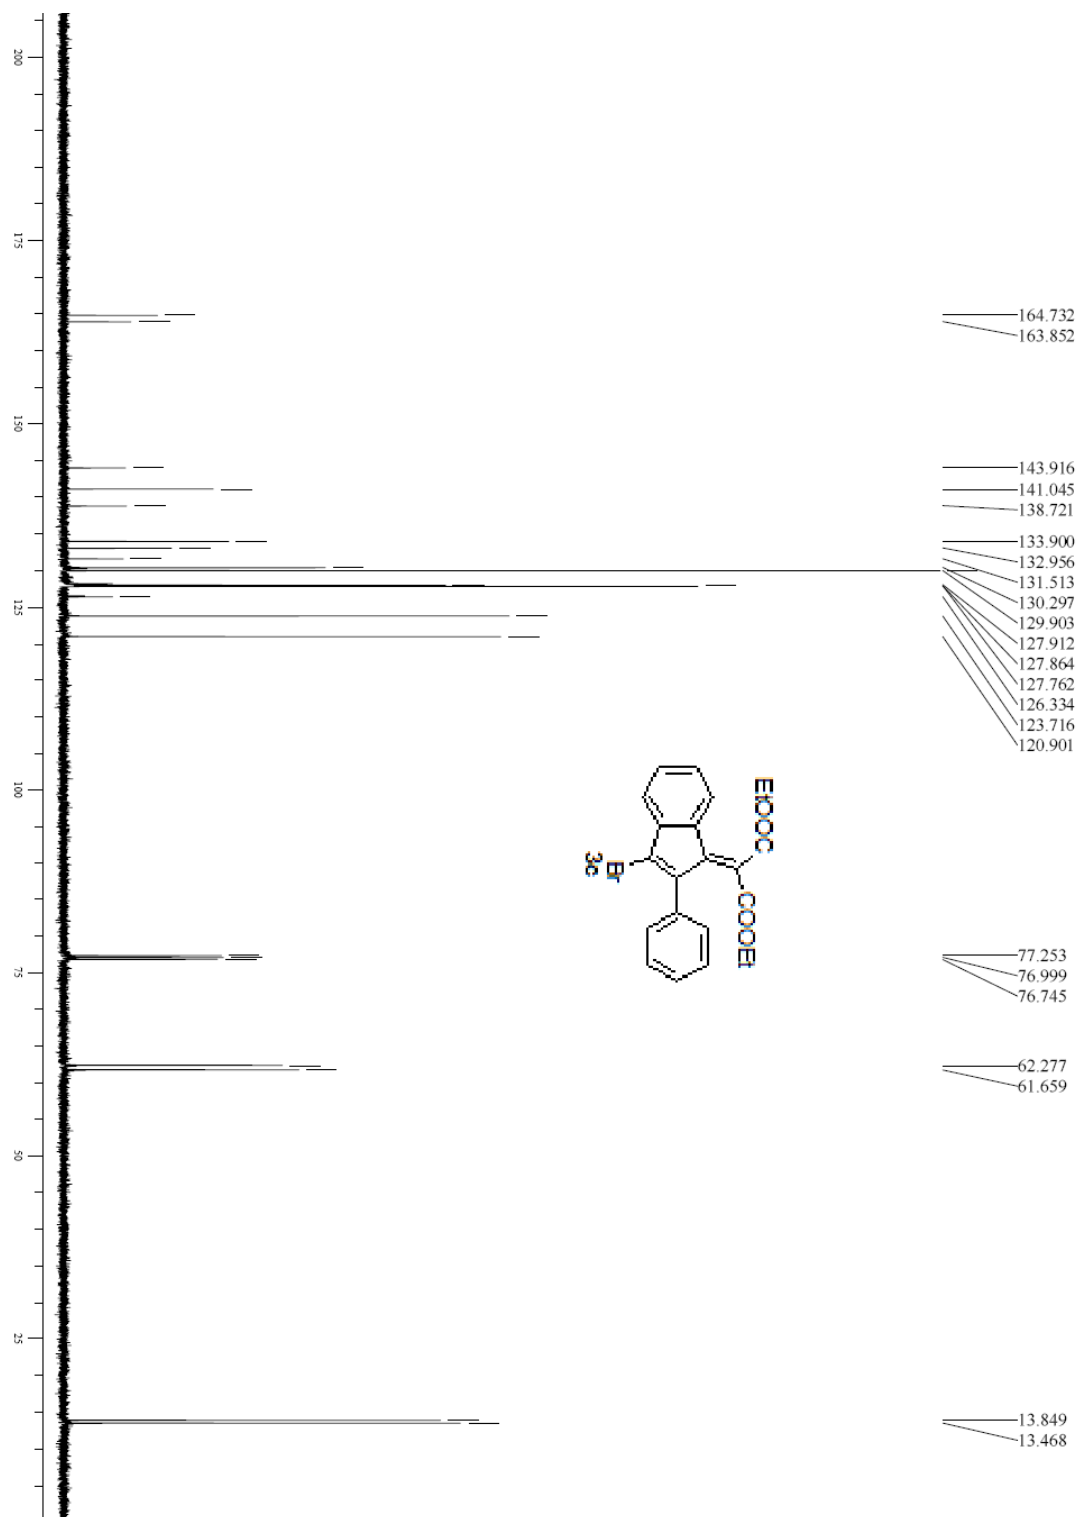

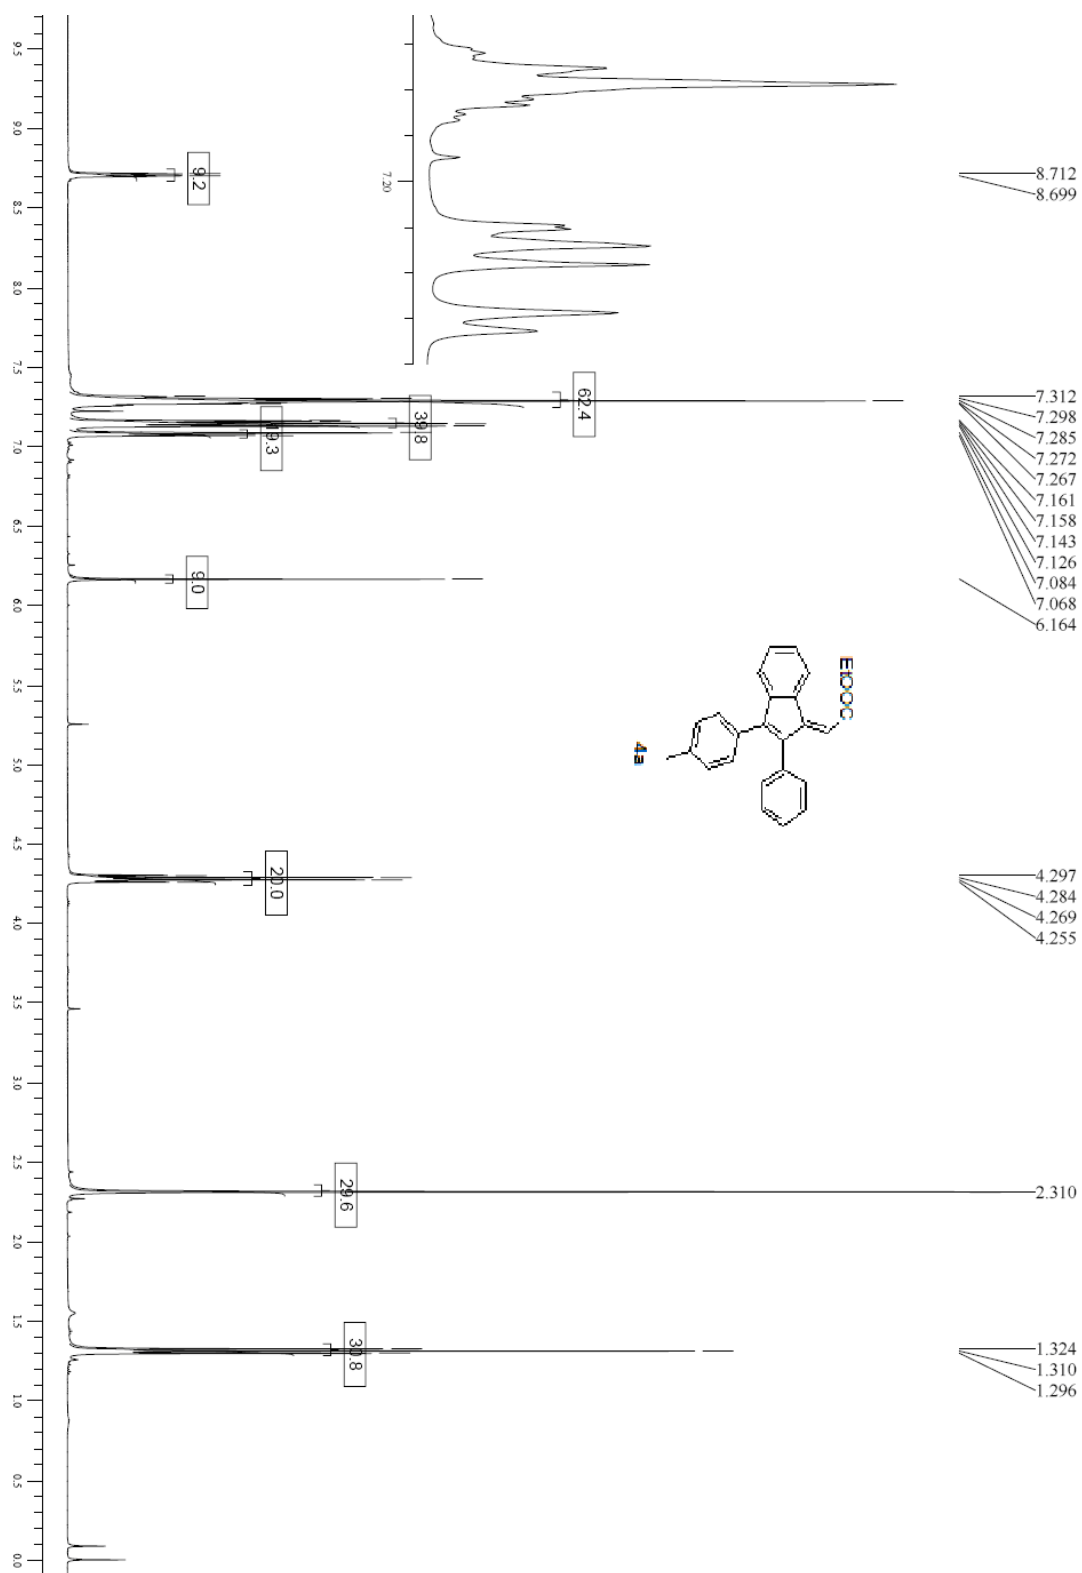

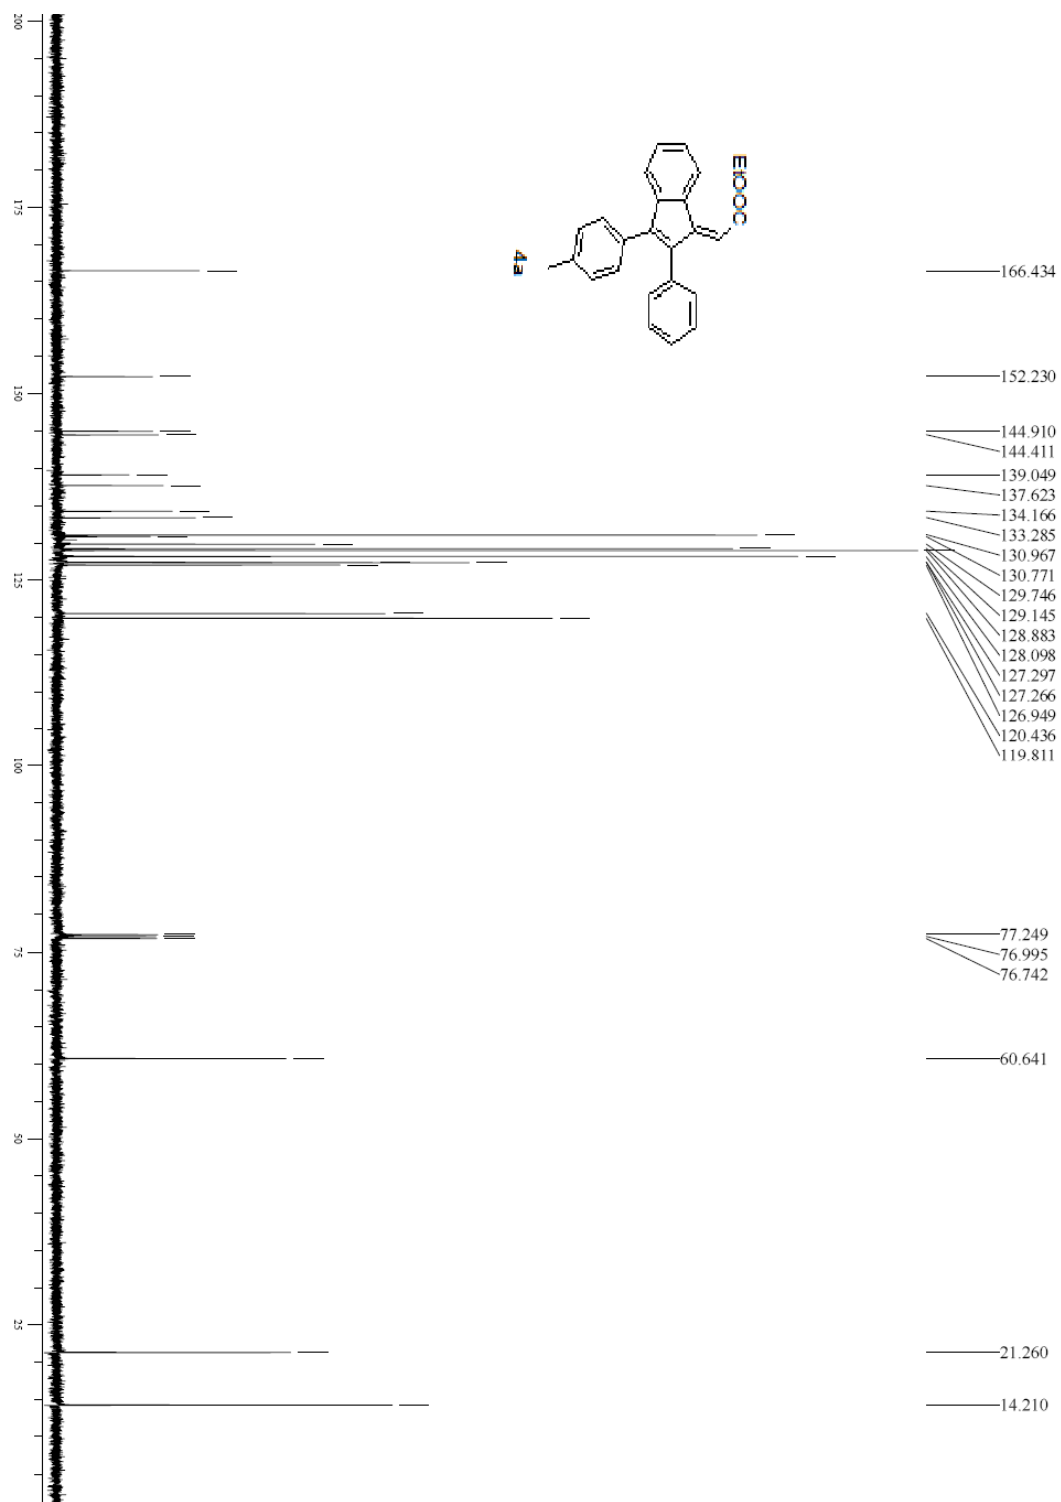



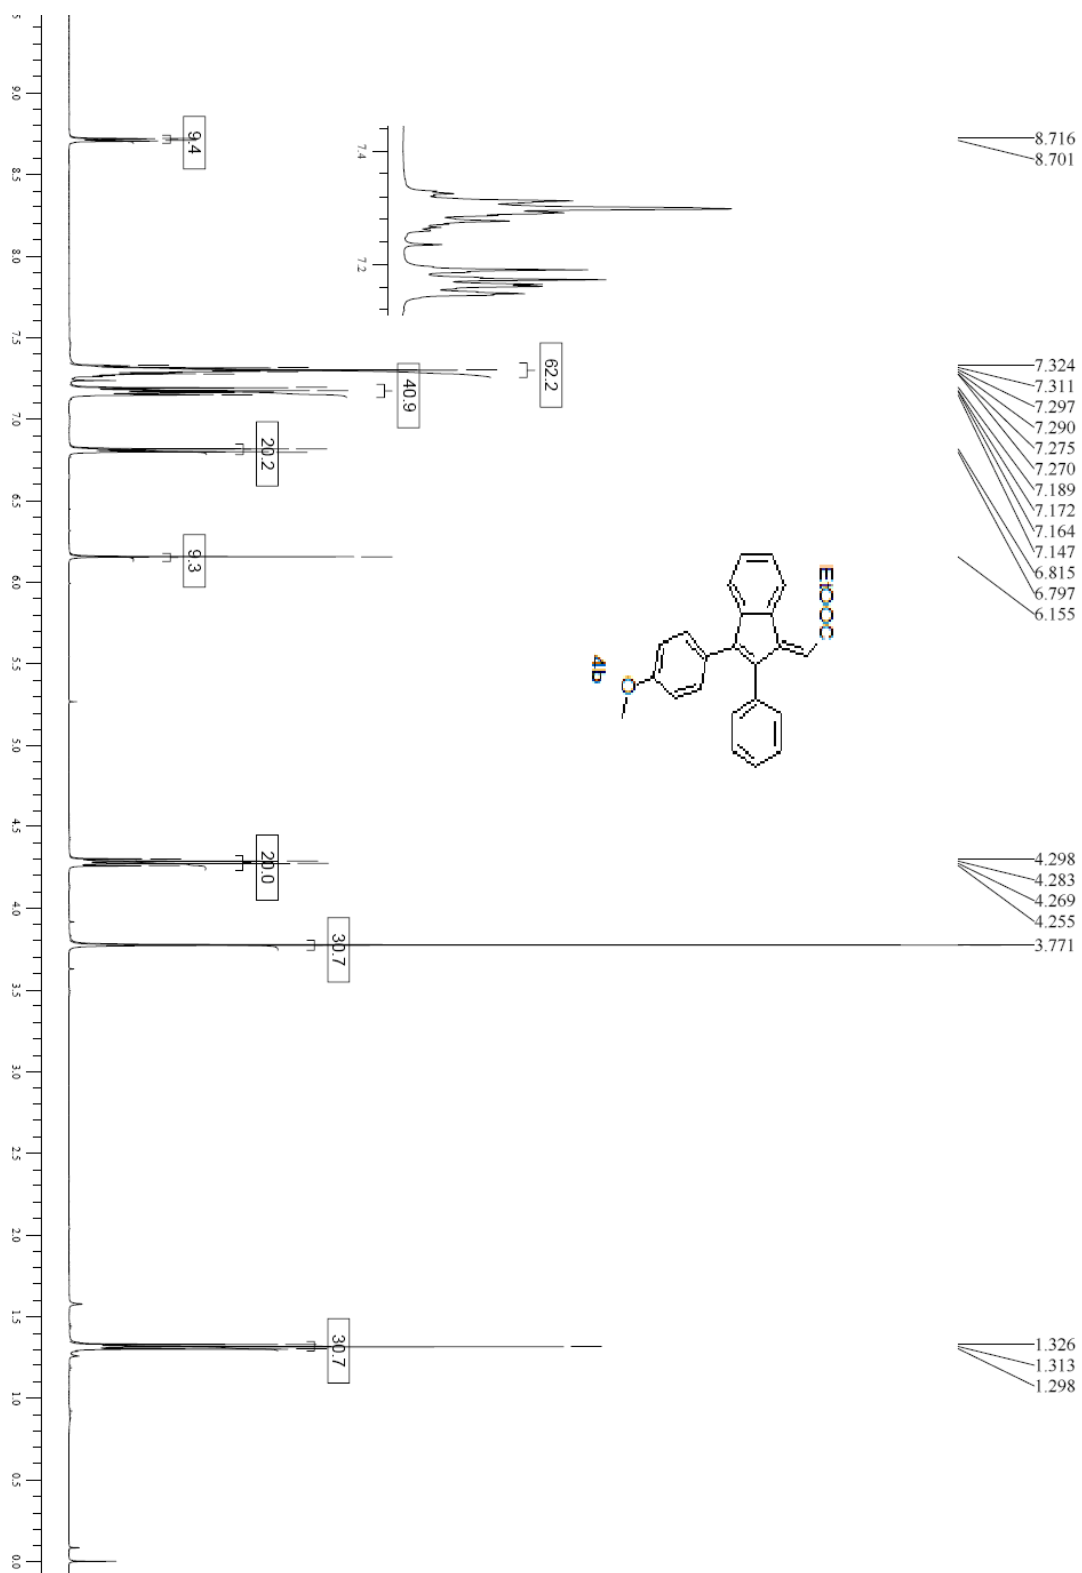

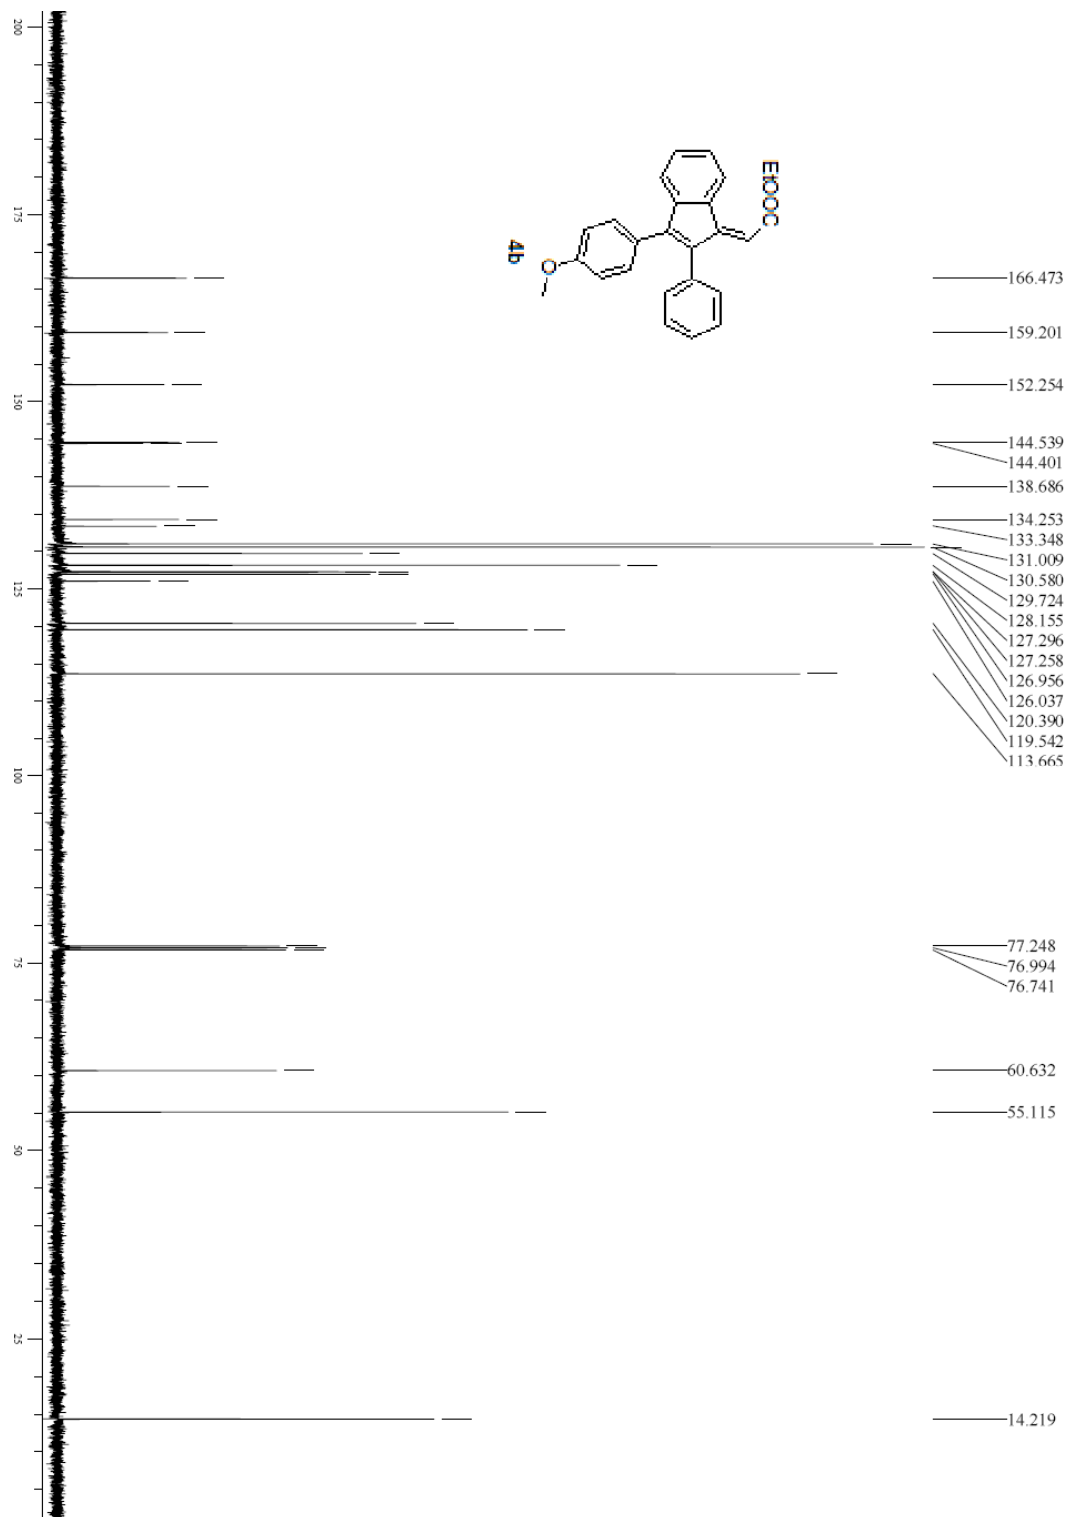

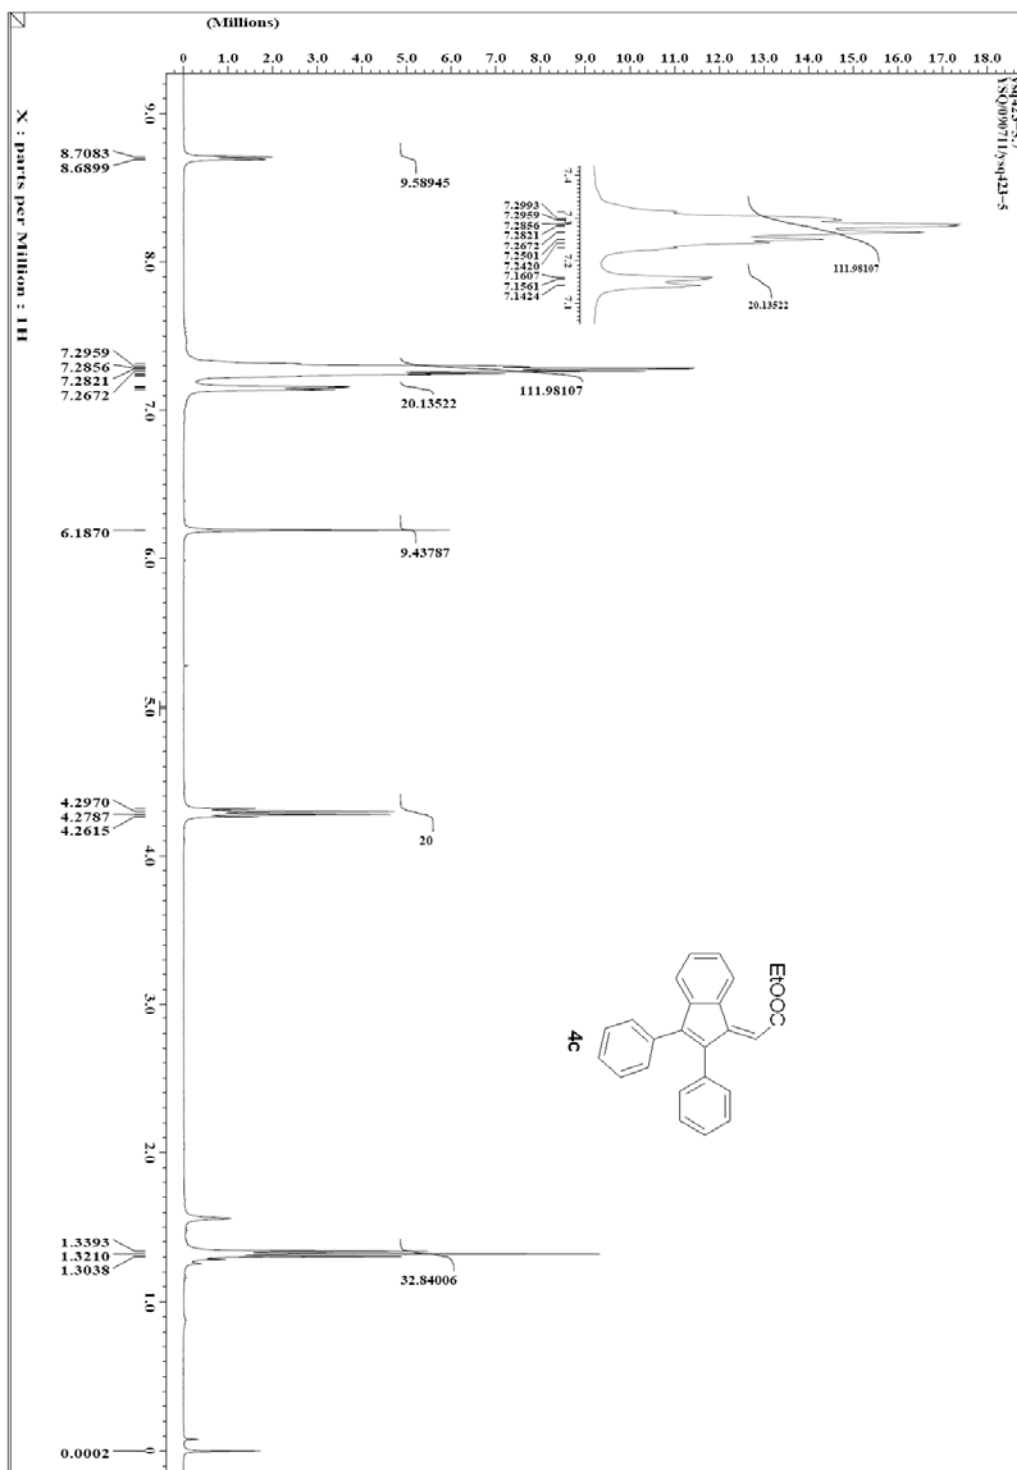

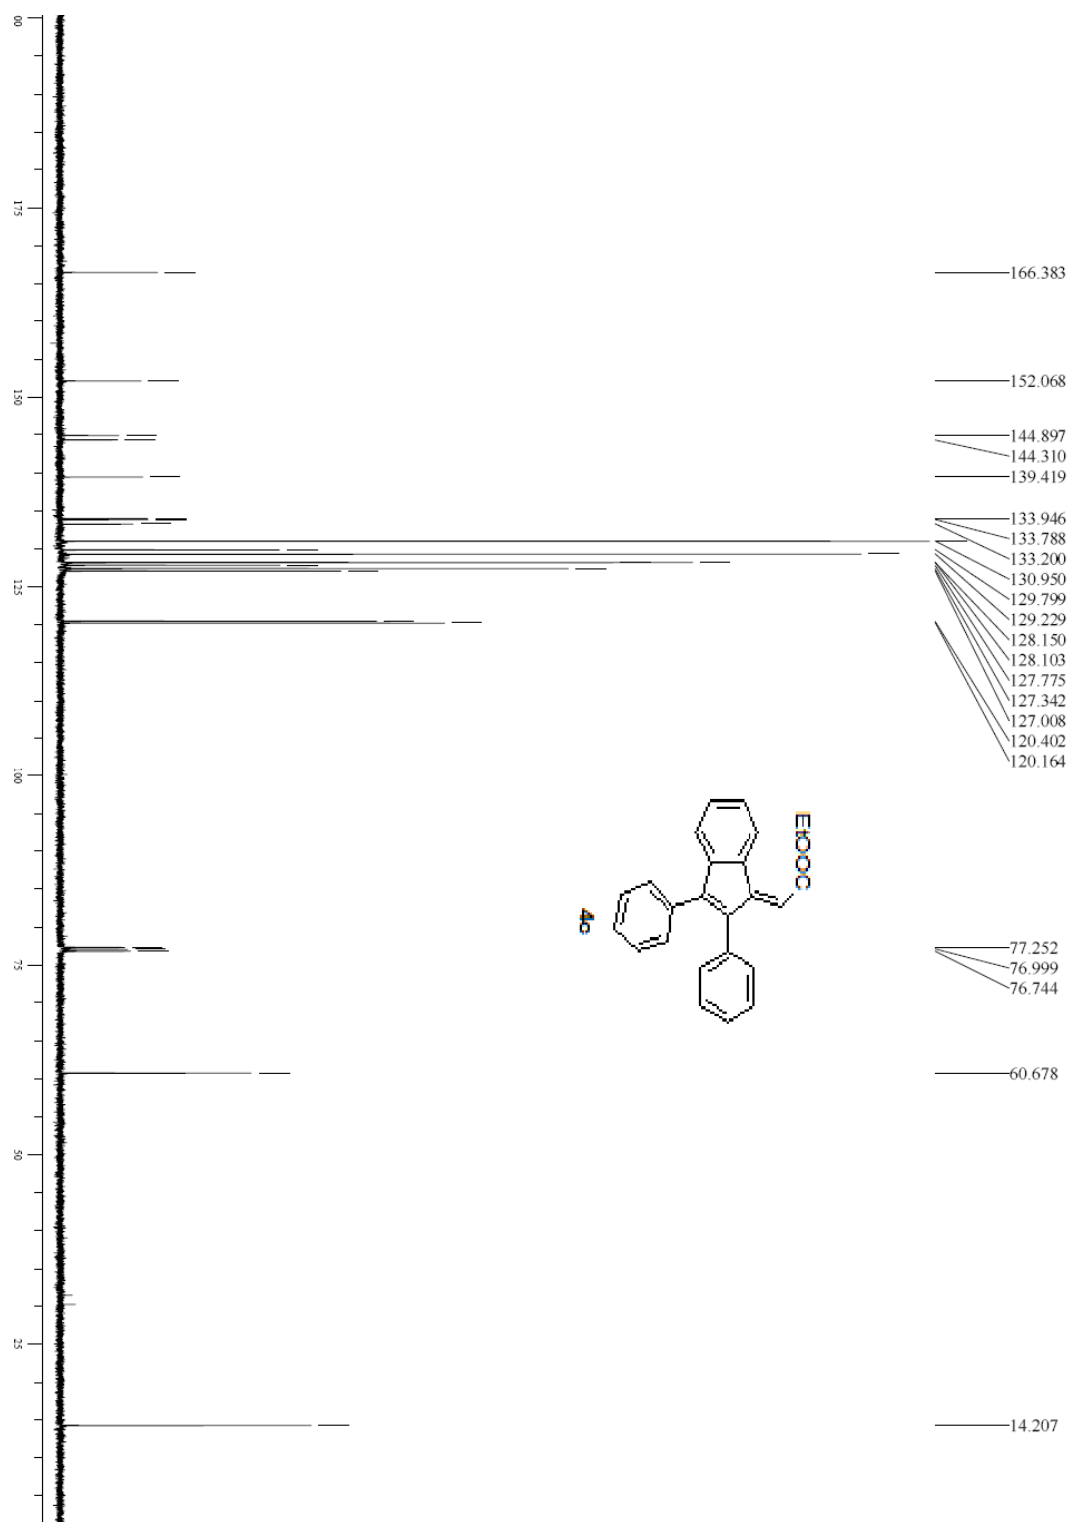

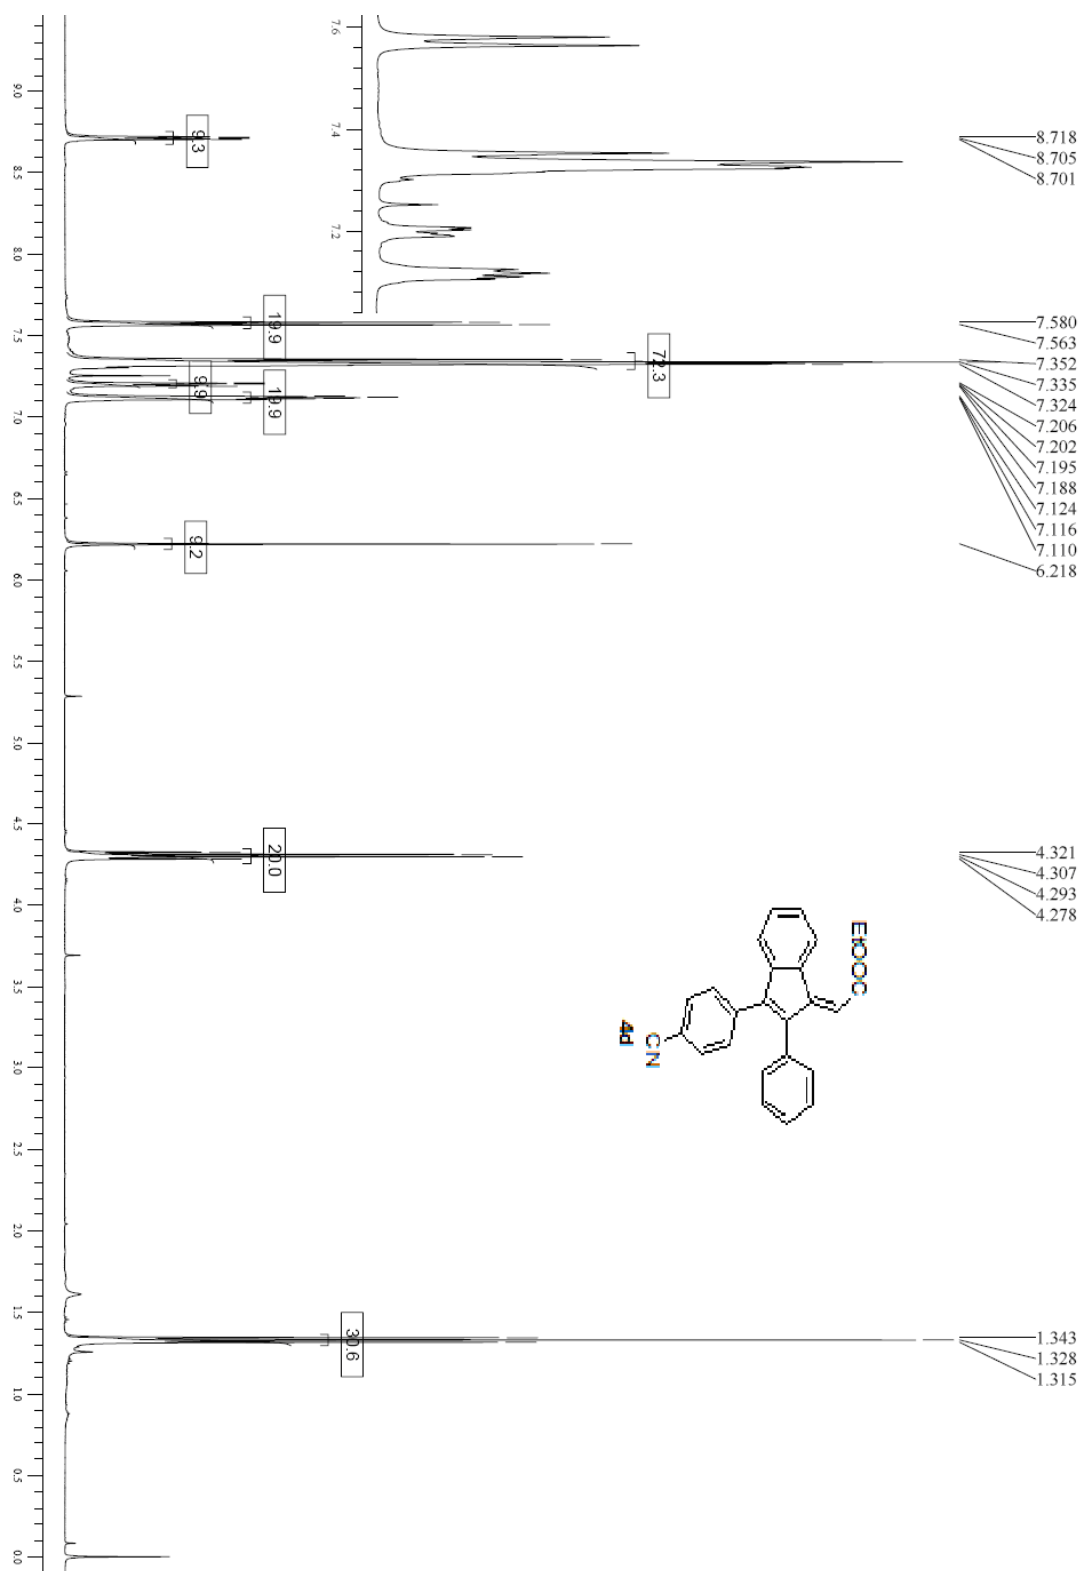

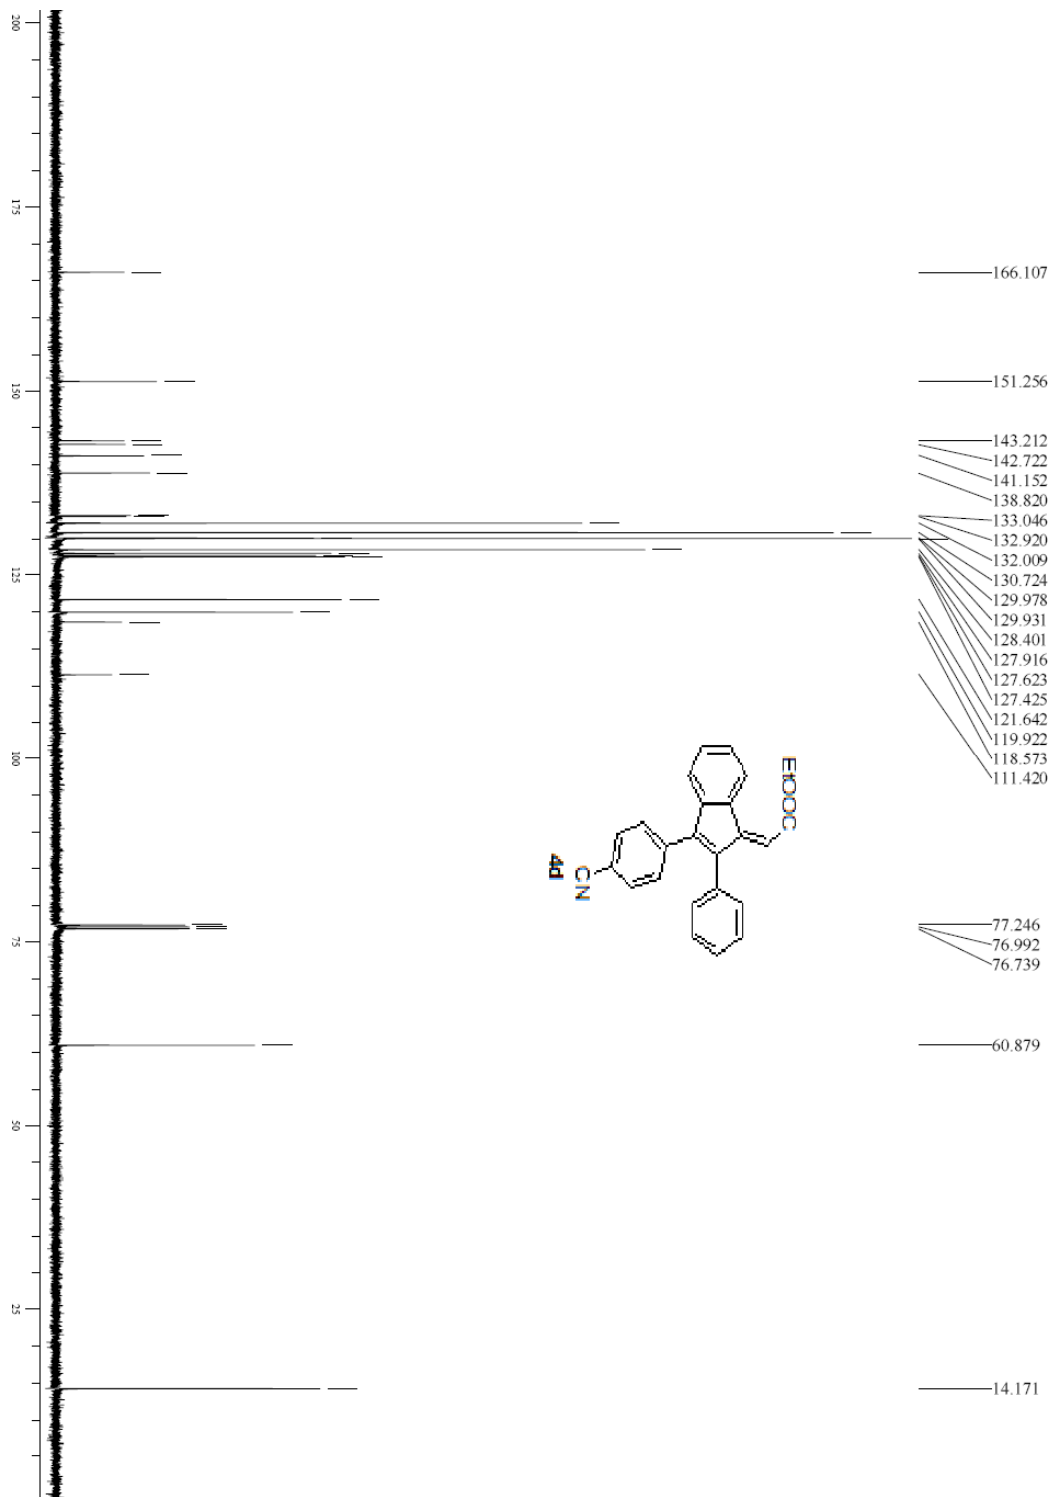

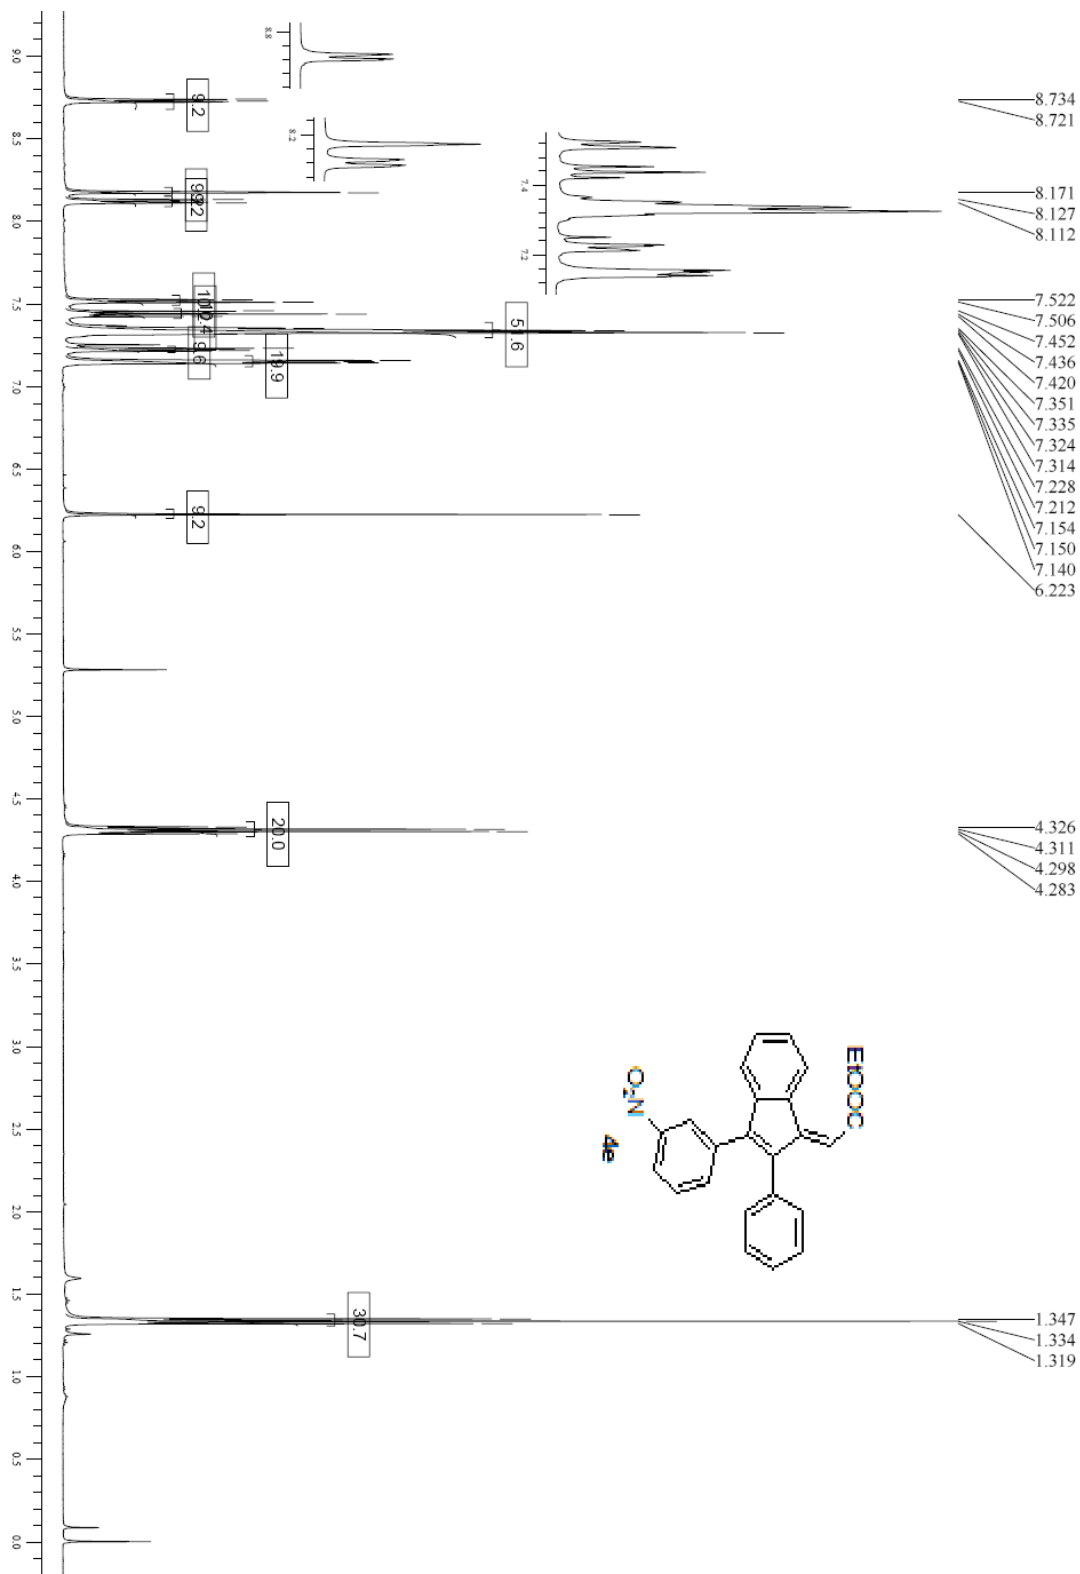

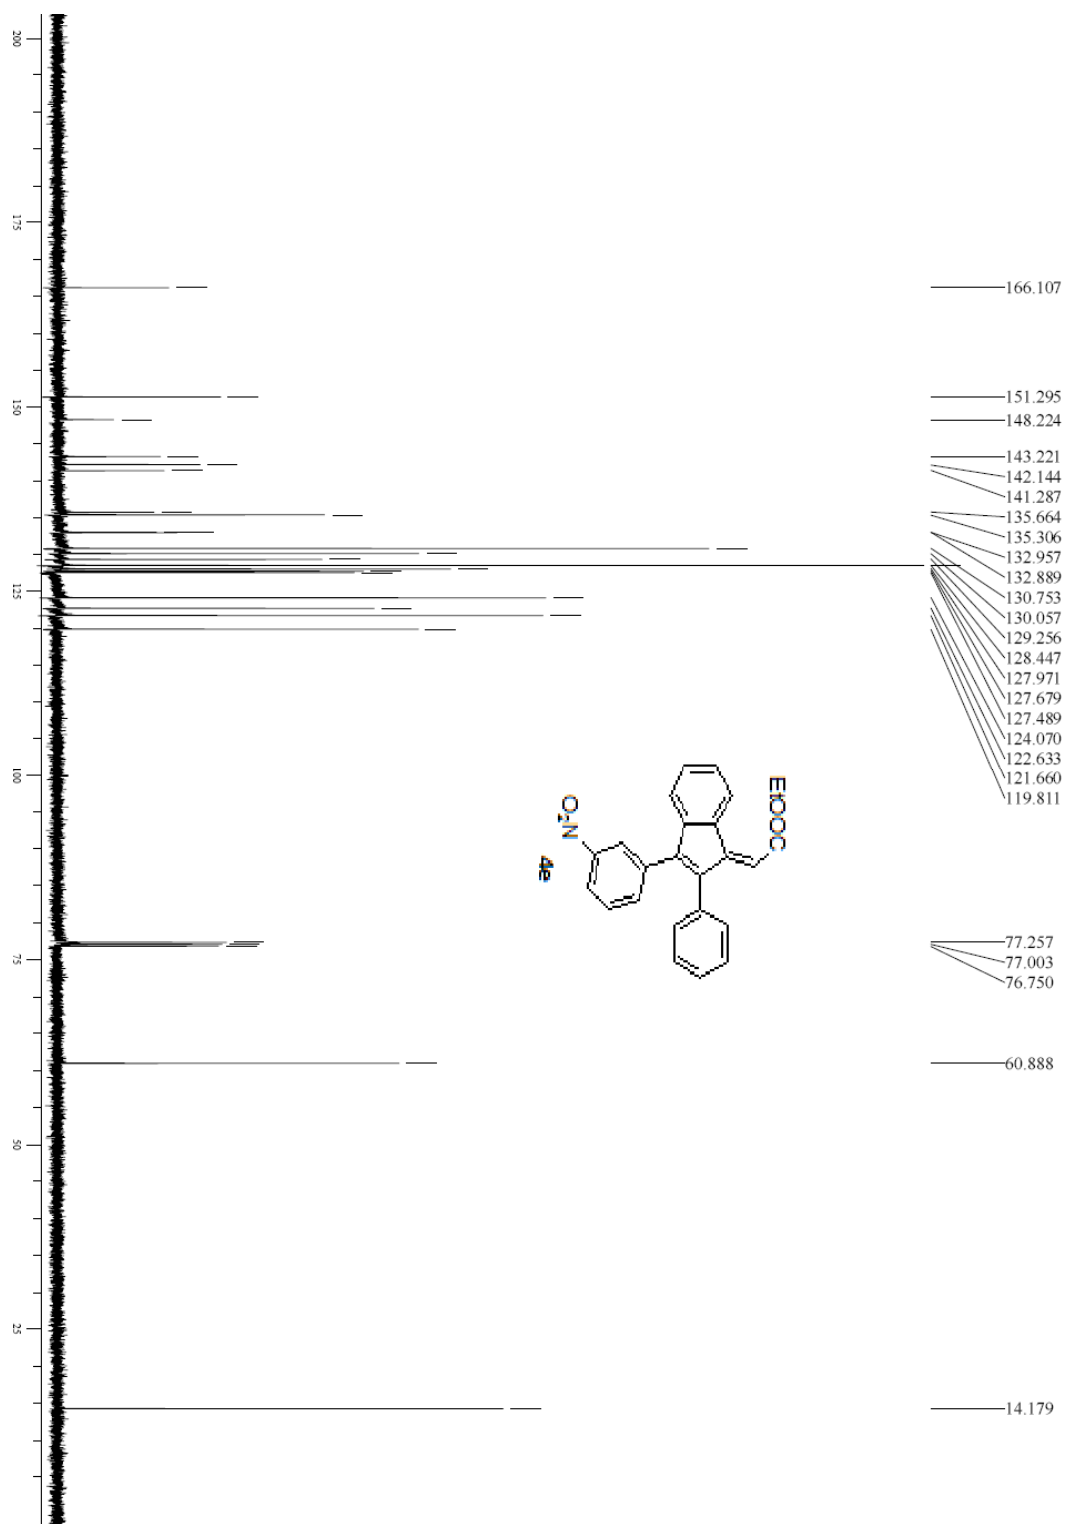



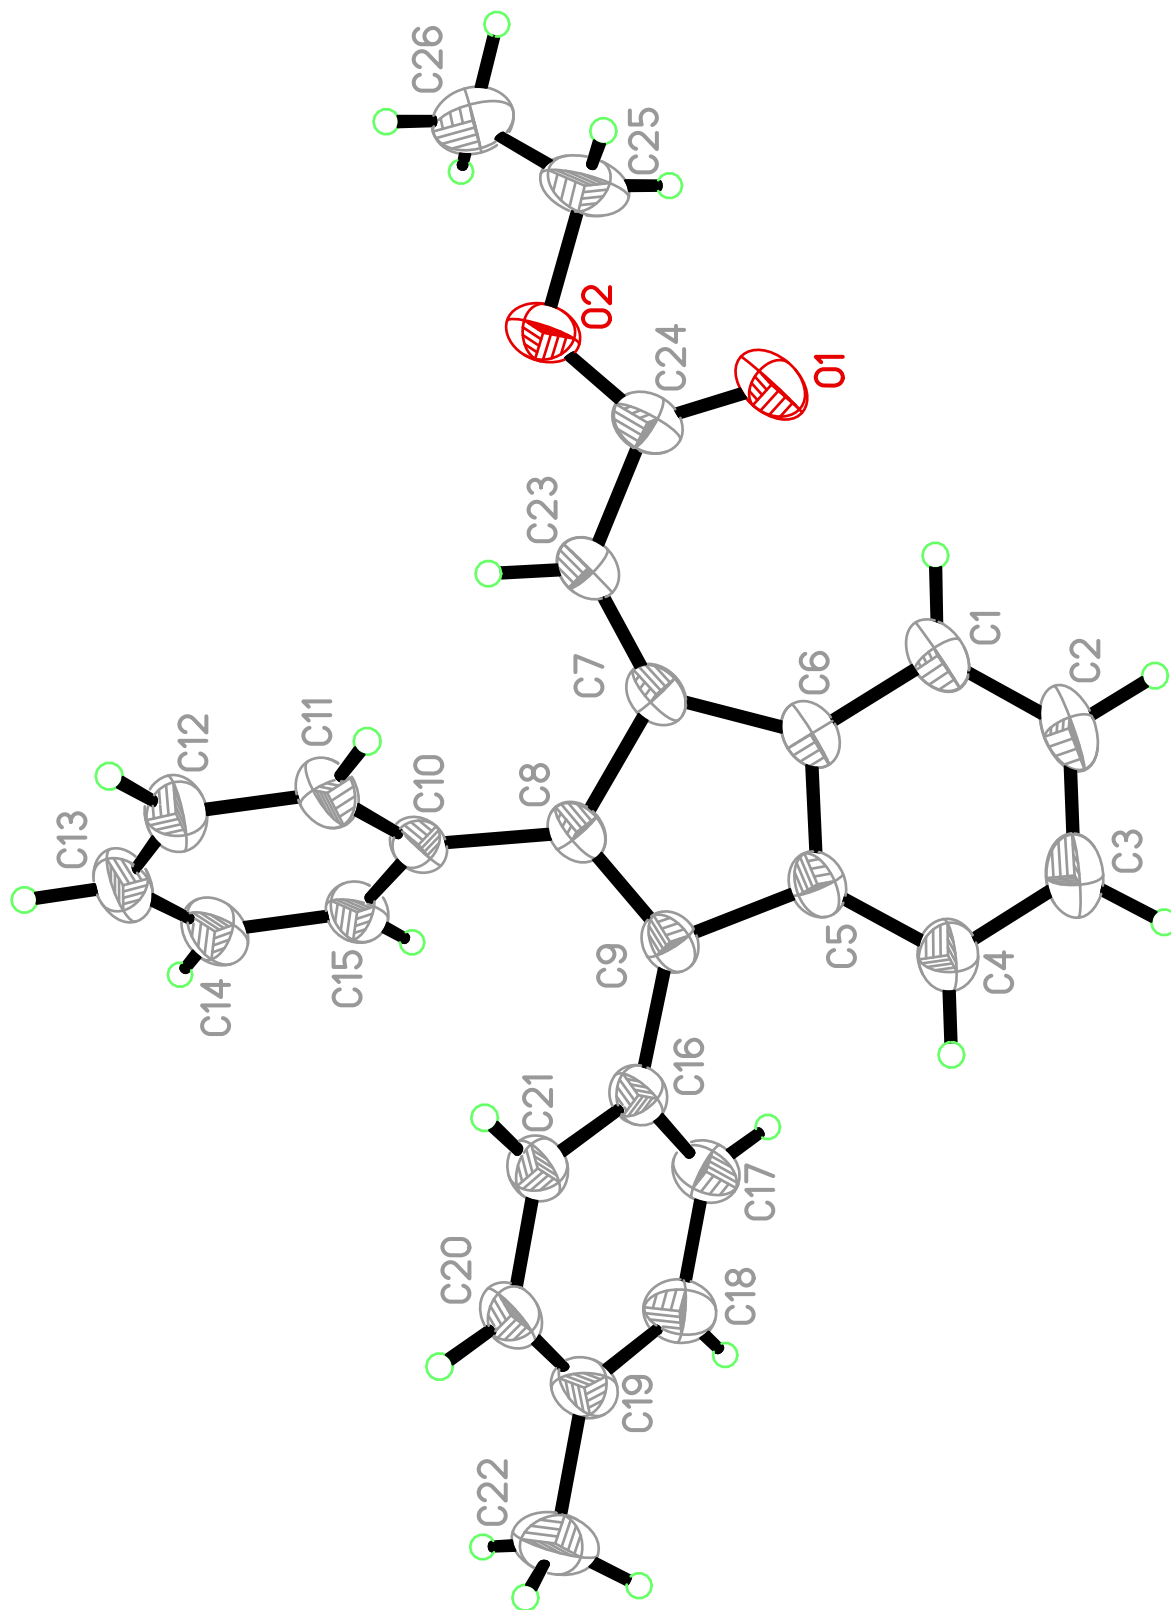

## checkCIF/PLATON report

No syntax errors found.    CIF dictionary    Interpreting this report

### Datablock: wujie090420\_0m

---

Bond precision:    C-C = 0.0029 Å

Wavelength=0.71073

Cell:            a=10.1464(3)            b=10.1719(3)            c=10.4892(3)  
                  alpha=72.943(1)        beta=79.827(1)        gamma=81.861(1)  
Temperature:    296 K

|                | Calculated  | Reported    |
|----------------|-------------|-------------|
| Volume         | 1014.04(5)  | 1014.04(5)  |
| Space group    | P -1        | P-1         |
| Hall group     | -P 1        | ?           |
| Moiety formula | C26 H22 O2  | ?           |
| Sum formula    | C26 H22 O2  | C26 H22 O2  |
| Mr             | 366.44      | 366.44      |
| Dx,g cm-3      | 1.200       | 1.200       |
| Z              | 2           | 2           |
| Mu (mm-1)      | 0.074       | 0.074       |
| F000           | 388.0       | 388.0       |
| F000'          | 388.17      |             |
| h,k,lmax       | 12,12,12    | 12,12,12    |
| Nref           | 3987        | 3946        |
| Tmin,Tmax      | 0.963,0.971 | 0.864,1.000 |
| Tmin'          | 0.954       |             |

Correction method= MULTI-SCAN

Data completeness= 0.990

Theta(max)= 25.990

R(reflections)= 0.0567( 3197)

wR2(reflections)= 0.1593( 3946)

S = 1.058

Npar= 255

---

The following ALERTS were generated. Each ALERT has the format

**test-name\_ALERT\_alert-type\_alert-level.**

Click on the hyperlinks for more details of the test.

---

#### Alert level C

ABSTM02\_ALERT\_3\_C The ratio of expected to reported Tmax/Tmin(RR') is < 0.90

Tmin and Tmax reported:            0.864            1.000

Tmin(prime) and Tmax expected:        0.954            0.971

RR(prime) =            0.880

Please check that your absorption correction is appropriate.

ABSTY02\_ALERT\_1\_C An \_exptl\_absorpt\_correction\_type has been given without

a literature citation. This should be contained in the  
\_exptl\_absorpt\_process\_details field.

Absorption correction given as multi-scan

CELLT02\_ALERT\_1\_C The cell measurement temperature is greater than the  
given melting point of the compound.  
Value of measurement temperature given = 296.000  
Value of melting point given = 0.000

SHFSU01\_ALERT\_2\_C The absolute value of parameter shift to su ratio > 0.05  
Absolute value of the parameter shift to su ratio given 0.058  
Additional refinement cycles may be required.

PLAT080\_ALERT\_2\_C Maximum Shift/Error ..... 0.06

PLAT220\_ALERT\_2\_C Large Non-Solvent C Ueq(max)/Ueq(min) ... 2.70 Ratio

PLAT061\_ALERT\_4\_C Tmax/Tmin Range Test RR' too Large ..... 0.88

PLAT063\_ALERT\_4\_C Crystal Probably too Large for Beam Size ..... 0.63 mm

PLAT153\_ALERT\_1\_C The su's on the Cell Axes are Equal (x 100000) 30 Ang.

PLAT195\_ALERT\_1\_C Missing \_cell\_measurement\_theta\_max datum .... ?

PLAT196\_ALERT\_1\_C Missing \_cell\_measurement\_theta\_min datum .... ?

### Alert level G

ABSTM02\_ALERT\_3\_G When printed, the submitted absorption T values will be  
replaced by the scaled T values. Since the ratio of scaled T's  
is identical to the ratio of reported T values, the scaling  
does not imply a change to the absorption corrections used in  
the study.  
Ratio of Tmax expected/reported 0.971  
Tmax scaled 0.971 Tmin scaled 0.839

PLAT062\_ALERT\_4\_G Rescale T(min) & T(max) by ..... 0.97

PLAT154\_ALERT\_1\_G The su's on the Cell Angles are Equal (x 10000) 100 Deg.

PLAT180\_ALERT\_4\_G Check Cell Rounding: # of Values Ending with 0 = 3

- 0 ALERT level A = In general: serious problem
- 0 ALERT level B = Potentially serious problem
- 11 ALERT level C = Check and explain
- 4 ALERT level G = General alerts; check

- 6 ALERT type 1 CIF construction/syntax error, inconsistent or missing data
- 3 ALERT type 2 Indicator that the structure model may be wrong or deficient
- 2 ALERT type 3 Indicator that the structure quality may be low
- 4 ALERT type 4 Improvement, methodology, query or suggestion
- 0 ALERT type 5 Informative message, check

### Publication of your CIF in IUCr journals

**A basic structural check has been run on your CIF. These basic checks will be run on all CIFs submitted for publication in IUCr journals (*Acta Crystallographica*, *Journal of Applied Crystallography*, *Journal of Synchrotron Radiation*); however, if you intend to submit to *Acta Crystallographica Section C* or *E*, you should make sure that full publication checks are run on the final version of your CIF prior to submission.**

### Publication of your CIF in other journals

**Please refer to the *Notes for Authors* of the relevant journal for any special instructions relating to CIF submission.**

PLATON version of 09/04/2009; check.def file version of 08/04/2009

Datablock wujie090420\_0m - ellipsoid plot

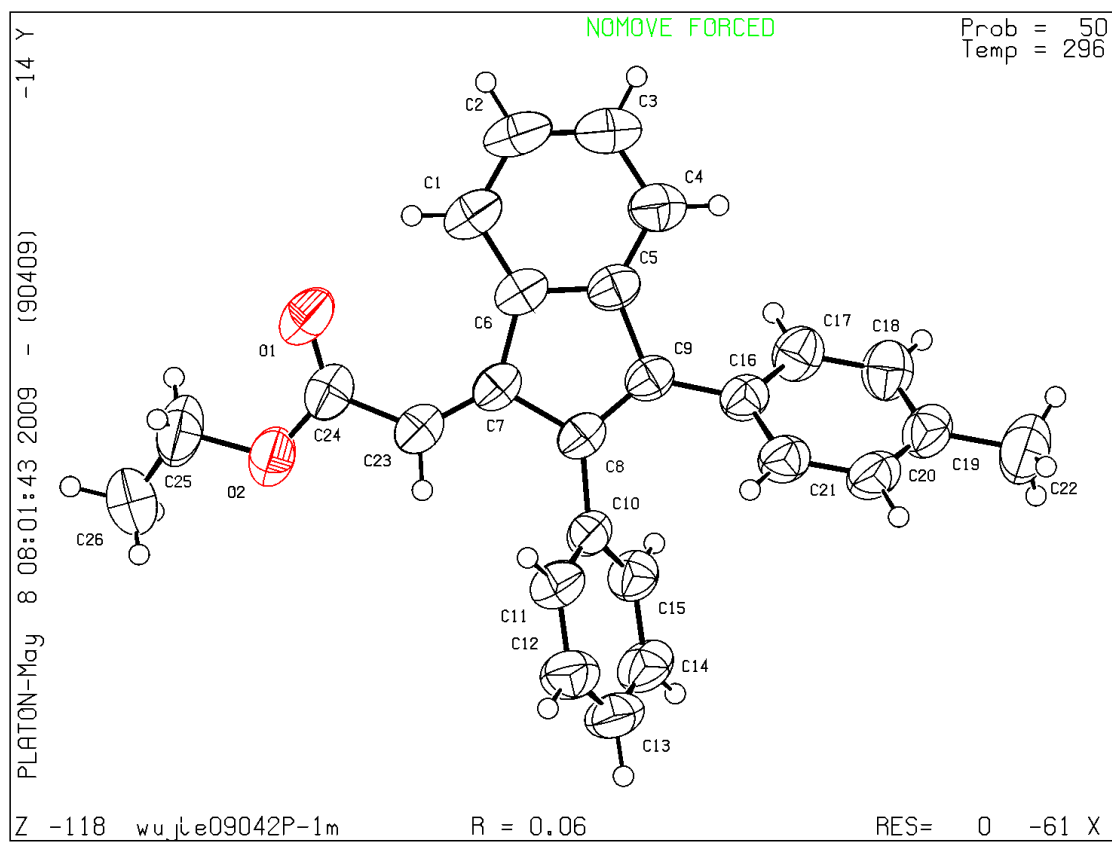

Supplement: b909178e.pdf [file b909178e.pdf]
